# Supplementary material for: Exploring cardiometabolic markers in adverse pregnancy outcomes: insights from the GROWell study
Source: Research Square preprint supplement (doi:10.21203/rs.3.rs-8844977/v1), 2026-04-23
Supplement: Supplementary file 1 [file 93a9f926ad6752bd815359b8.xlsx]

## Sheet: Table of Contents
Supplemental Table	Description
Supplemental Table 1	Lipid Profile and Modules
Supplemental Table 2	Module Trait Correlation at 10-16 weeks
Supplemental Table 3	Top 10 Consensus Hub Lipids at 10-16weeks
Supplemental Table 4	Top 10 Consensus Hub Lipids at 36-38weeks
Supplemental Table 5	Top 10 Consensus Hub Lipids at Postpartum
Supplemental Table 6	Differential Lipid Analysis at 10-16wks for APOs
Supplemental Table 7	Module Trait Correlation at 36-38 weeks
Supplemental Table 8	Differential Lipid Analysis at 36-38wks for APOs
Supplemental Table 9	Module Trait Correlation at Postpartum
Supplemental Table 10	Differential Lipid Analysis at Postpartum for APOs
Supplemental Table 11	Differential Lipid Analysis at 10-16wks for PPWR
Supplemental Table 12	Differential Lipid Analysis at 36-38wks for PPWR
Supplemental Table 13	Differential Lipid Analysis at Postpartum for PPWR
Supplemental Table 14	Early Pregnancy Triglycerides associated with APOs found in our paper and other sources
Supplemental Table 15	Postpartum Triglycerides associated with APOs found in our paper and other sources

## Sheet: S1.Lipid Profile and Modules
Lipid Profile and Module Membership Statistics
Lipid	Module	Super_class	Main_class	Sub_class	midnightblue	black	magenta	purple	tan	lightgreen	turquoise	pink	salmon	brown	yellow	royalblue	grey60	red	cyan	lightyellow	blue	green	lightcyan	darkred	greenyellow	grey
TG.50.3.Isomer.A	black	Glycerolipids	Triradylglycerols	TAG	0.605127	0.816431	0.638698	0.906546	-0.115336	-0.20266	0.542823	0.0886578	-0.072973	-0.469749	-0.356111	-0.148236	-0.344902	-0.456432	-0.18939	0.0420291	-0.0848769	0.172139	-0.133033	0.0510042	0.478319	-0.265914
TG.50.4	black	Glycerolipids	Triradylglycerols	TAG	0.601466	0.830127	0.457919	0.720975	-0.0587193	-0.119751	0.548786	0.00539149	-0.146437	-0.362246	-0.306472	-0.13248	-0.368683	-0.33308	-0.201382	-0.033894	-0.0853687	0.0713482	-0.208075	0.0430651	0.338347	-0.183753
TG.51.4	black	Glycerolipids	Triradylglycerols	TAG	0.4429	0.742274	0.193027	0.533431	0.00582076	0.0404616	0.411058	-0.113076	-0.295079	-0.423562	-0.429178	0.0332065	-0.21511	-0.168676	-0.106719	-0.0292645	-0.0551182	0.192485	0.0406575	0.0790589	0.148219	0.0807513
TG.52.3	black	Glycerolipids	Triradylglycerols	TAG	0.624015	0.873794	0.755577	0.826658	-0.0521241	-0.381249	0.232465	0.134798	-0.011032	-0.349014	-0.198644	-0.213393	-0.378925	-0.470155	-0.0869721	0.274372	0.129774	0.203236	-0.0624836	0.0358364	0.20734	-0.305181
TG.52.4	black	Glycerolipids	Triradylglycerols	TAG	0.712831	0.95045	0.59481	0.701168	-0.109726	-0.396329	0.198265	0.19696	0.0252948	-0.258589	-0.190303	-0.259745	-0.474681	-0.424705	-0.155455	0.204019	0.153164	0.235203	0.0174763	0.00966145	0.133256	-0.322692
TG.52.5	black	Glycerolipids	Triradylglycerols	TAG	0.664054	0.953443	0.460276	0.542354	0.0217596	-0.327963	0.125979	0.0970135	-0.0856723	-0.238042	-0.189307	-0.231009	-0.45928	-0.34927	-0.191893	0.134711	0.146427	0.164139	-0.00476675	0.0376728	-0.0108654	-0.169367
TG.53.4	black	Glycerolipids	Triradylglycerols	TAG	0.525857	0.889865	0.644774	0.730673	0.168865	-0.177498	0.314733	0.046224	-0.0826014	-0.404432	-0.309795	-0.186175	-0.363246	-0.416346	-0.174674	0.126927	0.0743948	0.104657	-0.0213021	0.0153773	0.0753652	-0.182106
TG.54.5.Isomer.A	black	Glycerolipids	Triradylglycerols	TAG	0.575003	0.881463	0.720467	0.513244	0.128242	-0.337259	0.0470976	0.189184	0.0787089	-0.160011	-0.055458	-0.329094	-0.492989	-0.458898	-0.251838	0.0766921	0.227424	0.162199	-0.0196636	-0.0212378	-0.0781493	-0.341508
TG.54.6.Isomer.A	black	Glycerolipids	Triradylglycerols	TAG	0.446846	0.834129	0.475968	0.331592	0.221323	-0.228809	0.00920851	0.0589953	-0.107586	-0.129066	-0.0868107	-0.13127	-0.370496	-0.249947	-0.254669	0.0502097	0.19701	0.0926229	0.0165744	0.0355658	-0.23758	-0.0405923
TG.54.7.Isomer.A	black	Glycerolipids	Triradylglycerols	TAG	0.2295	0.592086	0.150736	0.0937221	0.178571	-0.173381	-0.146154	-0.0972884	-0.147419	-0.00871041	0.0265549	-0.0109984	-0.210196	-0.0258963	-0.203461	0.0410788	0.166497	-0.0099053	-0.0473721	0.0225144	-0.278569	0.138822
PC.O.37.0	blue	Glycerophospholipids	Glycerophosphocholines	O-PC	-0.08013	0.0475412	0.0534128	0.00788184	-0.264722	-0.338623	-0.253804	-0.0448339	-0.0192545	-0.0567432	0.145501	0.116528	0.120315	-0.149997	0.485964	0.344915	0.810209	0.660455	0.371966	0.245604	0.106363	-0.146632
SM.20.3.2O.24.0	blue	Sphingolipids	Phosphosphingolipids	SM	0.125917	0.190952	0.135271	-0.0679724	-0.105772	-0.463426	-0.481104	0.0546675	0.0592714	0.173538	0.34542	0.0359539	0.133359	-0.0878871	0.216101	0.632741	0.675304	0.185726	0.157496	0.114939	-0.171793	-0.149611
SM.24.1	blue	Sphingolipids	Phosphosphingolipids	SM	-0.00709037	0.163795	0.279184	0.0959983	-0.19617	-0.49149	-0.384804	-0.114524	-0.0767368	0.00370162	0.327521	0.0457933	0.142895	-0.183013	0.311898	0.594769	0.781734	0.377467	0.175808	0.194307	0.0566334	-0.19175
SM.42.1.3O	blue	Sphingolipids	Phosphosphingolipids	SM	-0.103634	0.247197	0.260163	0.0876651	-0.0639262	-0.387547	-0.291383	-0.201167	-0.114784	-0.163074	0.264011	0.0921911	0.174239	-0.2642	0.323617	0.448951	0.759001	0.396319	0.203609	0.201983	0.0139756	-0.0305008
SM.44.1.2O	blue	Sphingolipids	Phosphosphingolipids	SM	-0.257981	-0.0206151	-0.142389	-0.106529	0.109974	-0.13934	-0.300227	-0.302098	-0.285437	-0.056763	0.101413	0.360222	0.438334	0.038831	0.384962	0.254555	0.601938	0.318339	0.246459	0.237642	-0.0714169	0.375725
SM.d40.0.Isomer.A	blue	Sphingolipids	Phosphosphingolipids	SM	-0.0727691	0.0183531	0.0202031	-0.0990972	-0.295256	-0.343581	-0.383108	-0.00996729	0.0641575	0.0463444	0.250457	0.0257236	0.118992	-0.165018	0.468676	0.338586	0.849098	0.652031	0.349265	0.15772	0.0386728	-0.229753
SM.d40.1	blue	Sphingolipids	Phosphosphingolipids	SM	-0.00947957	0.0471096	0.0550729	-0.0626891	-0.326149	-0.381588	-0.362852	0.0295677	0.115162	0.0293283	0.222346	0.0066188	0.0955371	-0.168186	0.455142	0.328798	0.831379	0.668616	0.374124	0.140402	0.0587161	-0.27517
SM.d42.0	blue	Sphingolipids	Phosphosphingolipids	SM	-0.0627754	-0.0372771	-0.00437523	-0.167157	-0.180867	-0.376907	-0.45969	-0.0852982	0.0113166	0.0674499	0.347061	0.0575579	0.122249	-0.144734	0.391203	0.343624	0.866807	0.395746	0.162766	0.0209585	-0.0692725	-0.196929
SM.d42.1	blue	Sphingolipids	Phosphosphingolipids	SM	-0.272066	-0.11395	-0.066624	-0.216063	0.0570742	-0.187022	-0.360319	-0.292682	-0.235526	9.52335e-05	0.212939	0.341459	0.443068	0.00353245	0.494693	0.342369	0.728455	0.30694	0.210285	0.117673	-0.136999	0.226633
SM.d42.3	blue	Sphingolipids	Phosphosphingolipids	SM	0.202873	0.219438	0.243067	-0.0266008	-0.278631	-0.523045	-0.486003	0.338738	0.308547	0.220498	0.355119	-0.121712	-0.00563893	-0.209793	0.196374	0.551808	0.607988	0.40153	0.355894	0.0577956	-0.157381	-0.436237
SM.d43.1.Isomer.B	blue	Sphingolipids	Phosphosphingolipids	SM	-0.221053	0.0308036	-0.0897164	-0.130165	-0.174414	-0.273471	-0.42416	-0.252146	-0.169649	-0.0644985	0.246657	0.0653201	0.296625	-0.169591	0.498835	0.350879	0.807361	0.606542	0.424068	0.190117	0.0268768	0.0336135
SM.d44.1	blue	Sphingolipids	Phosphosphingolipids	SM	-0.0712315	0.1537	0.0904004	0.0441413	0.0184576	-0.397717	-0.301659	-0.253806	-0.24542	-0.0560185	0.214257	0.231621	0.274896	-0.205857	0.476046	0.452174	0.850763	0.427591	0.205568	0.183748	0.0227166	0.0751678
SM.d44.2.isomer.A	blue	Sphingolipids	Phosphosphingolipids	SM	-0.00336273	0.131123	0.178561	0.0469395	-0.0775311	-0.44397	-0.312279	-0.187221	-0.180907	-0.0397124	0.310472	0.0463109	0.0756414	-0.236628	0.237683	0.487789	0.811216	0.245179	0.0224108	0.0598858	0.070434	-0.121331
MG.20.4	brown	Glycerolipids	Monoradylglycerols	MAG	0.192987	-0.0076867	-0.0772578	-0.250947	-0.276023	-0.26835	-0.34697	0.431525	0.517314	0.695698	0.522439	-0.301492	-0.1466	0.0196853	-0.0172742	0.0328177	0.0940347	0.158869	0.207758	-0.149795	-0.23304	-0.432515
PE.36.4	brown	Glycerophospholipids	Glycerophosphoethanolamines	PE	-0.135773	-0.325631	-0.248241	-0.509047	-0.0424981	-0.119373	-0.45159	0.388619	0.487489	0.901904	0.679999	-0.279761	-0.020077	0.0696574	-0.0470631	0.0945279	0.0163433	-0.0571958	0.143983	-0.230898	-0.307627	-0.210615
PE.38.4	brown	Glycerophospholipids	Glycerophosphoethanolamines	PE	0.0439999	-0.282349	-0.281185	-0.547687	-0.0921444	-0.094175	-0.454044	0.338706	0.388473	0.82067	0.668404	-0.239668	-0.1882	-0.000944119	-0.199335	-0.0908208	0.0500792	-0.0728288	0.0306371	-0.386682	-0.419286	-0.161089
PE.38.5	brown	Glycerophospholipids	Glycerophosphoethanolamines	PE	-0.199726	-0.427406	-0.456205	-0.552409	-0.0653586	-0.0347329	-0.427808	0.265403	0.300828	0.751933	0.577842	-0.263659	-0.0846624	0.10118	0.00476711	0.0540948	0.0529835	-0.0541626	0.0891039	-0.246783	-0.168724	-0.138271
PE.38.6	brown	Glycerophospholipids	Glycerophosphoethanolamines	PE	0.128602	-0.29838	-0.276724	-0.441498	-0.104216	-0.0295433	-0.291748	0.292337	0.397786	0.804459	0.479701	-0.318414	-0.204683	0.0872571	-0.266292	-0.163772	-0.22181	-0.231429	-0.146451	-0.459685	-0.302114	-0.189541
PE.O.16.1_22.6	brown	Glycerophospholipids	Glycerophosphoethanolamines	O-PE	-0.0572549	-0.2816	-0.36947	-0.542928	-0.105755	-0.0514193	-0.392865	0.240956	0.308153	0.78805	0.518228	-0.206436	-0.0391746	0.15034	-0.10516	-0.0284289	-0.0176978	-0.0132249	0.212952	-0.17106	-0.374227	0.0147418
PE.O.18.1_22.6	brown	Glycerophospholipids	Glycerophosphoethanolamines	O-PE	0.0422229	-0.28706	-0.272079	-0.548056	-0.0879023	-0.232644	-0.453193	0.235374	0.348082	0.850024	0.621434	-0.256994	-0.128529	0.0712497	-0.114382	-0.0188835	0.104603	-0.0345686	0.0753295	-0.27357	-0.412001	-0.129913
PE.O.40.5.Isomer.B	brown	Glycerophospholipids	Glycerophosphoethanolamines	O-PE	-0.185304	-0.357089	-0.212341	-0.468874	0.0359825	-0.11156	-0.340565	0.186441	0.355617	0.73652	0.508981	-0.0757385	0.0788263	0.180362	0.012291	0.0358006	0.0288374	-0.116649	0.160982	-0.381115	-0.415908	-0.121858
PE.O.40.6.Isomer.B	brown	Glycerophospholipids	Glycerophosphoethanolamines	O-PE	-0.0189085	-0.213857	-0.301389	-0.416189	-0.00534934	-0.25609	-0.400162	0.179786	0.216985	0.733189	0.464903	-0.194163	-0.101788	0.126794	-0.00939902	0.0488754	-0.0109554	-0.134442	0.0933748	-0.126845	-0.334589	-0.0581966
PE.P.36.4.or.PE.O.36.5	brown	Glycerophospholipids	Glycerophosphoethanolamines	O-PE	-0.0631591	-0.336014	-0.302543	-0.539545	-0.144845	-0.124	-0.473117	0.383083	0.504451	0.931247	0.701358	-0.355719	-0.0904498	0.0766424	-0.0459976	0.0574789	-0.00445436	-0.094718	0.077615	-0.365486	-0.316057	-0.29171
PE.P.38.5.or.PE.O.38.6	brown	Glycerophospholipids	Glycerophosphoethanolamines	O-PE	-0.106271	-0.26925	-0.344896	-0.574671	-0.05898	-0.0889003	-0.522162	0.215991	0.292053	0.902502	0.713129	-0.286711	-0.099472	0.152893	-0.0292364	0.0737659	0.0441287	-0.107246	0.0636428	-0.278537	-0.418479	-0.112323
PE.P.40.4.or.PE.O.40.5.Isomer.A	brown	Glycerophospholipids	Glycerophosphoethanolamines	O-PE	0.0328774	-0.131629	-0.0610847	-0.279661	-0.22408	-0.367899	-0.459077	0.184506	0.369327	0.786506	0.768818	-0.297367	-0.07217	-0.0937494	0.121822	0.234962	0.220403	0.110274	0.13987	-0.381568	-0.212494	-0.408417
Phosphatidylethanolamine.alkenyl.16.0.20.4	brown	Glycerophospholipids	Glycerophosphoethanolamines	PE	-0.156088	-0.290047	-0.294122	-0.448979	0.0303536	-0.0254357	-0.36207	0.264761	0.358697	0.800151	0.499509	-0.159937	0.0392947	0.154397	0.0140159	0.0527305	0.0165792	0.00114311	0.311962	-0.268079	-0.410133	-0.0108397
Cer.18.2.2O.22.0	cyan	Sphingolipids	Ceramides	Cer	-0.380218	-0.371845	-0.261331	-0.229411	-0.197392	-0.0535181	-0.29738	-0.324947	-0.130177	0.134062	0.258826	0.114914	0.62399	0.299834	0.852941	0.49967	0.238711	0.207066	0.263855	0.103267	0.0139045	0.0978432
Cer.18.2.2O.23.0	cyan	Sphingolipids	Ceramides	Cer	-0.310071	-0.247678	-0.281543	-0.172532	-0.101678	-0.00773615	-0.259197	-0.401991	-0.287777	0.100384	0.171871	0.227151	0.601758	0.229047	0.765368	0.533326	0.180348	0.222804	0.354921	0.00669542	-0.00789624	0.233551
Cer.d36.1	cyan	Sphingolipids	Ceramides	Cer	-0.255663	-0.224519	-0.220758	-0.0742072	-0.0964719	-0.090786	-0.223877	-0.23811	-0.154132	-0.0801355	-0.0851166	0.137926	0.560929	0.307621	0.837429	0.496445	0.266127	0.290039	0.453669	0.222848	0.00571284	0.157486
Cer.d38.1	cyan	Sphingolipids	Ceramides	Cer	-0.251945	-0.0877923	-0.0545984	0.0115804	-0.0376326	-0.112674	-0.204882	-0.453575	-0.352462	-0.197481	-0.0283101	0.252673	0.630204	0.141215	0.895403	0.551883	0.440439	0.354804	0.298746	0.223355	0.0762468	0.254826
Cer.d40.1	cyan	Sphingolipids	Ceramides	Cer	-0.296096	-0.149673	-0.115738	-0.106132	0.0301544	-0.171879	-0.176725	-0.375717	-0.350867	-0.116965	0.00726486	0.295776	0.497588	0.227972	0.868626	0.564004	0.492199	0.216728	0.213422	0.271851	-0.0823621	0.247687
Cer.d40.2	cyan	Sphingolipids	Ceramides	Cer	-0.464946	-0.27147	-0.0961796	-0.0964535	-0.0251111	-0.0871935	-0.224612	-0.375705	-0.31206	-0.0958909	0.0422418	0.118813	0.500609	0.14243	0.808355	0.481251	0.341865	0.303954	0.251024	0.263954	0.123614	0.190988
Cer.d42.1	cyan	Sphingolipids	Ceramides	Cer	-0.139996	-0.00173236	0.0254598	0.126581	-0.0121976	-0.160976	-0.170341	-0.417536	-0.359451	-0.247726	-0.0299639	0.252409	0.498431	0.0506029	0.790819	0.693992	0.508007	0.257933	0.170799	0.231007	0.101372	0.222845
LPC.16.0	darkred	Glycerophospholipids	Glycerophosphocholines	LPC	-0.298411	0.0296485	-0.0361304	0.073084	0.0379311	0.0244188	0.0878876	-0.176496	-0.228212	-0.394189	-0.401604	0.592697	0.47463	0.440631	0.250517	0.215424	0.171378	0.0930887	0.0900044	0.926505	0.10567	0.421618
LPC.16.1	darkred	Glycerophospholipids	Glycerophosphocholines	LPC	-0.262417	0.100652	0.0105781	0.136685	0.000851441	-0.117711	0.0432101	-0.0194333	-0.154415	-0.237451	-0.210348	0.222292	0.203369	0.222874	0.124121	0.234145	0.0623481	0.0339287	0.0188414	0.797116	0.3712	0.111571
LPC.17.0	darkred	Glycerophospholipids	Glycerophosphocholines	LPC	-0.284146	0.0661472	-0.0590838	0.040085	0.0869712	0.131272	0.133896	-0.268891	-0.386178	-0.406508	-0.406653	0.500639	0.342464	0.353488	0.337547	0.169234	0.185408	0.161819	0.165605	0.88414	0.0217457	0.46787
LPC.18.0	darkred	Glycerophospholipids	Glycerophosphocholines	LPC	-0.323923	0.0663017	0.043296	0.0255484	0.109855	0.0679485	0.0901965	-0.156319	-0.247582	-0.344859	-0.31911	0.585784	0.376619	0.38669	0.223192	0.11449	0.263783	0.124265	0.146723	0.927647	-0.0632129	0.401742
LPC.18.1	darkred	Glycerophospholipids	Glycerophosphocholines	LPC	-0.379229	-0.09528	0.0336032	-0.0453658	0.0121016	0.0335818	0.078219	-0.0341799	-0.0341848	-0.262892	-0.177502	0.359905	0.322156	0.326747	0.116503	0.040799	0.0870924	0.0256137	0.0310226	0.888081	0.112017	0.149104
SM.18.0.2O.21.0	green	Sphingolipids	Phosphosphingolipids	SM	0.0634333	0.201231	0.130233	0.267748	-0.305025	-0.198611	-0.0327319	-0.135715	-0.109139	-0.291015	-0.102187	0.0415477	0.166936	-0.282201	0.440747	0.148798	0.439278	0.789409	0.504105	0.0714944	0.289753	-0.0975812
SM.d34.2	green	Sphingolipids	Phosphosphingolipids	SM	-0.0163911	0.146897	0.208665	0.0491517	-0.216495	-0.277054	-0.294782	0.217287	0.22444	0.0738763	0.191256	0.0073098	0.108748	-0.235653	0.199251	0.289255	0.528275	0.600927	0.4957	0.0310344	-0.00518415	-0.313396
SM.d37.1.Isomer.B	green	Sphingolipids	Phosphosphingolipids	SM	0.187554	0.103813	-0.0434769	0.0691058	-0.457134	-0.128752	-0.192976	0.272541	0.265986	0.0679561	0.0631429	-0.184592	-0.0158537	-0.245832	0.188905	0.063713	0.187944	0.799124	0.709749	-0.028896	0.166939	-0.312043
SM.d38.0.Isomer.A	green	Sphingolipids	Phosphosphingolipids	SM	0.189058	0.256053	0.181573	0.194705	-0.36823	-0.141126	-0.131562	0.149986	0.117576	-0.180356	-0.0756631	0.0311783	0.0592707	-0.297418	0.354717	0.176261	0.535324	0.891293	0.623337	0.172834	0.116785	-0.238276
SM.d38.1	green	Sphingolipids	Phosphosphingolipids	SM	0.2178	0.209145	0.21604	0.196986	-0.452007	-0.185674	-0.173272	0.198508	0.230381	-0.155444	-0.00738124	-0.0792458	0.018879	-0.356859	0.321584	0.170281	0.508735	0.870223	0.543066	0.0978074	0.185722	-0.367186
SM.d39.1	green	Sphingolipids	Phosphosphingolipids	SM	0.0614428	0.0192957	-0.002374	0.142581	-0.442321	-0.0530791	-0.0614774	0.0538827	0.0982917	-0.200184	-0.0635783	-0.0574901	0.0716713	-0.347716	0.336948	-0.0110949	0.285538	0.826991	0.423636	-0.0148409	0.395784	-0.233301
SM.d39.2.Isomer.B	green	Sphingolipids	Phosphosphingolipids	SM	0.161747	0.176253	0.053507	0.115524	-0.292863	-0.0483176	-0.0512286	0.396865	0.256757	0.0102335	-0.0477876	-0.159743	-0.0677969	-0.307905	0.111207	0.0402999	0.18037	0.717272	0.679888	-0.0194578	0.124834	-0.373322
SM.d40.2.Isomer.B	green	Sphingolipids	Phosphosphingolipids	SM	0.142662	0.0828995	0.193504	-0.00376881	-0.405239	-0.212438	-0.218719	0.375878	0.385888	0.117589	0.223647	-0.205956	-0.140483	-0.393899	0.176729	0.103499	0.496686	0.733538	0.432072	-0.0619112	0.0799893	-0.549934
SM.d41.0	green	Sphingolipids	Phosphosphingolipids	SM	-0.118308	0.0276974	0.000496279	0.0391177	-0.242253	-0.146442	-0.312584	-0.139436	-0.0698105	-0.186759	-0.00473526	0.0350427	0.270875	-0.240557	0.493445	0.264944	0.641947	0.81006	0.580568	0.113008	0.163962	0.010126
SM.d41.1	green	Sphingolipids	Phosphosphingolipids	SM	-0.0572556	0.0838834	0.00996749	0.0753219	-0.329864	-0.172388	-0.309705	-0.0834298	-0.0153533	-0.210206	0.018464	0.0234696	0.230593	-0.259149	0.482273	0.24319	0.658126	0.823501	0.527661	0.117293	0.254929	-0.099015
SM.d41.2.Isomer.B	green	Sphingolipids	Phosphosphingolipids	SM	0.0301246	0.0859805	0.0969478	0.131057	-0.455288	-0.243476	-0.228557	0.177525	0.158605	-0.0122863	0.148707	-0.13079	0.0726023	-0.379328	0.33693	0.252647	0.478636	0.887969	0.613445	-0.0303158	0.280524	-0.35778
PC.14.0_16.1	greenyellow	Glycerophospholipids	Glycerophosphocholines	PC	0.0585844	0.16774	0.157202	0.481284	-0.248708	0.108364	0.437998	-0.112608	-0.15327	-0.319275	-0.141756	0.0181444	-0.0842718	-0.286721	-0.192046	-0.116893	-0.206396	0.0687657	-0.311485	0.0552369	0.840284	-0.13375
PC.16.0_14.0	greenyellow	Glycerophospholipids	Glycerophosphocholines	PC	0.0274096	0.0612409	-0.00311494	0.34473	-0.334959	0.0369413	0.335231	-0.153331	-0.123563	-0.396377	-0.21849	-0.0330015	0.0388167	-0.271282	0.0360093	-0.0694905	-0.108278	0.191195	-0.183463	0.129754	0.918902	-0.166873
PC.28.0	greenyellow	Glycerophospholipids	Glycerophosphocholines	PC	-0.0397785	-0.0681535	-0.0519274	0.19093	-0.322969	0.168617	0.365731	-0.12132	-0.0495259	-0.279141	-0.101978	-0.0306825	-0.0885614	-0.18451	-0.22637	-0.278701	-0.21363	-0.0278621	-0.39148	-0.0287113	0.772527	-0.193589
PC.29.0	greenyellow	Glycerophospholipids	Glycerophosphocholines	PC	-0.0686083	-0.0364323	-0.0944589	0.272631	-0.314413	0.0773926	0.267915	-0.246952	-0.18757	-0.450514	-0.305473	0.0427885	0.0891489	-0.156036	0.161104	-0.0752079	-0.0840239	0.24223	-0.15218	0.170718	0.869392	-0.0257636
PC.31.1	greenyellow	Glycerophospholipids	Glycerophosphocholines	PC	-0.137512	0.00767619	0.0460872	0.39887	-0.258109	-0.0169154	0.223038	-0.185002	-0.137037	-0.338872	-0.1534	0.00306497	0.211025	-0.150235	0.202661	0.168198	-0.110798	0.172692	-0.0966034	0.0846473	0.899214	-0.129921
PC.32.1	greenyellow	Glycerophospholipids	Glycerophosphocholines	PC	0.121363	0.236534	0.259026	0.566401	-0.310282	-0.180944	0.269525	-0.0246725	-0.071875	-0.36514	-0.143646	-0.124105	-0.0767834	-0.317115	-0.0374572	0.122709	-0.0954472	0.127375	-0.179543	0.103507	0.917864	-0.307922
PC.33.1	greenyellow	Glycerophospholipids	Glycerophosphocholines	PC	0.0662729	0.179138	0.1759	0.471628	-0.356617	-0.108965	0.235624	-0.0375363	-0.0816919	-0.393109	-0.174297	-0.146504	-0.107046	-0.373595	0.086382	0.0612975	-0.0127604	0.32595	-0.0849869	0.137476	0.907766	-0.31686
PC.35.1	greenyellow	Glycerophospholipids	Glycerophosphocholines	PC	0.0752712	0.225393	0.321441	0.36055	-0.251913	-0.19694	0.0679837	0.187849	0.11181	-0.213843	0.0569206	-0.240617	-0.29798	-0.56514	-0.0363452	0.0361447	0.207026	0.417638	0.0525294	0.103248	0.59983	-0.524018
acylcarnitine.08.0	grey	Fatty Acyls	Fatty esters	Acyl carnitines	0.153279	0.366836	0.329117	0.271862	0.184995	-0.12716	-0.105569	-0.270311	-0.395035	-0.266076	0.0637057	-0.158873	-0.096007	-0.460533	0.184329	0.37219	0.378478	0.236047	0.0763106	-0.150495	0.0663602	0.0564147
acylcarnitine.08.1	grey	Fatty Acyls	Fatty esters	Acyl carnitines	0.133328	0.425885	0.296988	0.171572	0.0591413	-0.22962	-0.147758	-0.177141	-0.272495	-0.333401	-0.0417043	-0.00783191	0.117945	-0.286869	0.277934	0.350623	0.443839	0.275368	0.175948	0.0901653	-0.109345	0.0208408
acylcarnitine.10.0	grey	Fatty Acyls	Fatty esters	Acyl carnitines	-0.00418912	0.120169	-0.154234	-0.0389715	-0.0859467	-0.00250245	-0.134528	-0.109528	-0.260594	-0.208376	-0.071515	0.0457168	-0.0878316	-0.0228817	0.00745436	-0.0652818	0.0180858	0.0215872	-0.00964993	0.00110571	-0.0205254	0.153085
acylcarnitine.10.1	grey	Fatty Acyls	Fatty esters	Acyl carnitines	0.0340896	0.407376	0.105509	0.138887	0.126005	-0.156831	-0.12609	-0.230408	-0.380266	-0.212695	0.0234809	-0.0677318	-0.11803	-0.271864	0.113374	0.159919	0.162365	0.131904	0.0305016	-0.098744	0.0255963	0.115807
acylcarnitine.12.1	grey	Fatty Acyls	Fatty esters	Acyl carnitines	0.125693	0.0547634	0.159192	0.00040759	0.165836	-0.0517441	0.0596408	-0.037232	-0.036185	0.101855	0.123922	0.0900243	-0.038445	-0.200475	-0.054794	0.00199288	0.00345909	-0.0940806	-0.2266	-0.22873	-0.126315	0.075532
acylcarnitine.14.1	grey	Fatty Acyls	Fatty esters	Acyl carnitines	-0.366576	-0.134707	-0.277591	-0.23825	0.0326189	-0.00406678	-0.406547	-0.35714	-0.284318	-0.0215212	0.0724176	0.12355	0.252276	0.389067	0.192972	0.108781	0.0662557	-0.125238	0.0699243	0.0877513	-0.211017	0.411637
acylcarnitine.16.0	grey	Fatty Acyls	Fatty esters	Acyl carnitines	-0.0354077	-0.0716711	-0.0200135	0.137873	-0.0828879	0.010282	0.104997	0.027002	-0.0374118	-0.204029	-0.237855	0.159318	0.266785	0.0886468	0.209323	0.024119	0.0221218	0.0722586	0.0863488	0.254761	0.207165	0.00853263
acylcarnitine.18.0.Isomer.A	grey	Fatty Acyls	Fatty esters	Acyl carnitines	0.0830828	-0.122355	0.107325	0.0164996	-0.0519542	0.0358546	0.0977015	0.148145	0.168559	-0.110448	-0.124417	0.0822376	0.0976801	0.0727625	0.121302	-0.213508	0.108391	0.0535206	0.0010921	0.155093	-0.0189121	-0.173723
acylcarnitine.18.1	grey	Fatty Acyls	Fatty esters	Acyl carnitines	0.132942	-0.0529874	0.167269	0.0263827	-0.15982	-0.107929	-0.177295	0.185614	0.119904	0.0427391	0.0982737	0.000520033	0.00590836	-0.0744991	0.131414	-0.00495366	0.255142	0.162433	0.0901646	0.0992363	-0.0393328	-0.24879
acylcarnitine.18.2.Isomer.A	grey	Fatty Acyls	Fatty esters	Acyl carnitines	0.00105352	-0.0509315	-0.125714	-0.323717	-0.0525087	-0.121752	-0.337439	0.394765	0.293651	0.278494	0.0390291	0.0650952	0.0260095	0.324787	-0.0494228	-0.0729141	0.171064	0.0421582	0.303463	0.226358	-0.374857	-0.14007
acylcarnitine.20.1	grey	Fatty Acyls	Fatty esters	Acyl carnitines	-0.0243961	-0.00978793	0.121764	-0.0178207	-0.104482	-0.123542	-0.196699	-0.0455195	-0.0882886	-0.0293754	0.110846	0.0950322	0.0625315	-0.00520999	0.208431	0.0594356	0.435468	0.202708	0.112501	0.214893	-0.133994	-0.0504429
C16.Lactosyl.Ceramide..d18.1.16.0.	grey	Sphingolipids	Neutral_glycosphingolipids	LacCer	-0.441474	-0.151312	0.0899821	-0.0215109	0.0827657	-0.291634	-0.137152	-0.342619	-0.210029	0.00512177	0.288235	0.11945	0.388585	0.0493868	0.440209	0.516103	0.347228	-0.0658029	0.0166548	0.205794	0.0581526	0.0295781
CE_13.HODE	grey	Sterol Lipids	Sterol esters	Chol. esters	0.309046	0.468381	0.26358	0.267401	-0.0862033	-0.0459144	-0.0313508	0.258312	0.120747	-0.195788	-0.143358	-0.239856	-0.320078	-0.367622	-0.143002	0.00921425	0.199044	0.427543	0.240502	0.0633215	0.0266457	-0.173456
CE.18.1	grey	Sterol Lipids	Sterol esters	Chol. esters	0.343534	0.445886	0.411251	0.629693	-0.204191	-0.200265	0.225375	0.00525412	-0.138387	-0.401657	-0.169507	-0.134226	-0.275164	-0.54815	-0.0206681	0.17927	0.187832	0.431279	0.00926402	-0.0142282	0.473135	-0.212933
CE.18.2	grey	Sterol Lipids	Sterol esters	Chol. esters	0.587015	0.618158	0.594772	0.641587	-0.176356	-0.251901	0.208957	0.299139	0.133362	-0.247967	-0.136831	-0.341412	-0.49981	-0.700331	-0.126787	0.0923506	0.194263	0.49088	0.118636	-0.143356	0.302816	-0.495824
Cer.18.0.2O.24.0	grey	Sphingolipids	Ceramides	DHCer	-0.0853916	-0.206546	-0.211398	-0.235606	0.125742	0.238679	0.0485248	-0.289937	-0.184258	-0.162856	-0.148915	0.40097	0.287167	0.299462	0.323704	-0.0324293	0.0941273	-0.202507	-0.245448	0.100193	-0.127195	0.243788
Cer.18.0.3O.16.0..2OH.	grey	Sphingolipids	Ceramides	PhytoCer	-0.271252	-0.183946	-0.343308	-0.382831	0.348083	0.269622	-0.180146	-0.45979	-0.471643	0.123752	0.12462	0.197505	0.180403	0.139171	0.161591	0.137766	0.13306	-0.137817	-0.0411052	-0.0124319	-0.291872	0.595224
Cer.18.0.3O.24.0..2OH.	grey	Sphingolipids	Ceramides	PhytoCer	-0.259131	0.00413356	-0.134195	-0.0827484	0.374438	0.110095	0.0532197	-0.0619781	-0.182082	0.0843524	-0.0130706	0.0884897	-0.000747745	0.102003	-0.0921802	0.0661171	-0.124877	-0.18624	-0.00535659	0.157722	-0.259299	0.437167
Cer.18.1.2O_26.0..2OH.	grey	Sphingolipids	Ceramides	Cer	0.15807	0.4347	0.377838	0.645296	-0.00476639	-0.332069	0.218867	-0.391979	-0.492293	-0.40703	-0.138573	0.132978	0.120665	-0.268558	0.286105	0.409734	0.284861	0.190275	-0.0718501	0.0740344	0.455722	0.0530062
Cer.18.1.2O.26.0	grey	Sphingolipids	Ceramides	Cer	-0.281222	-0.369803	-0.54268	-0.487626	0.00835301	0.0635067	-0.433725	-0.259515	-0.146281	0.1981	0.260387	0.254462	0.435762	0.223966	0.48279	0.347852	0.423789	0.134996	0.166615	-0.0144717	-0.260851	0.360306
Cer.20.0.2O.24.0	grey	Sphingolipids	Ceramides	DHCer	-0.127024	-0.119841	-0.239784	-0.223121	0.371205	0.395429	0.0527237	-0.259968	-0.290105	-0.123118	-0.129772	0.273817	0.04956	-0.0348816	0.0596272	-0.157631	0.025002	-0.125167	-0.114931	-0.0120678	-0.213498	0.47318
Cer.20.0.2O.25.0	grey	Sphingolipids	Ceramides	DHCer	-0.33609	-0.247016	-0.330434	-0.299463	0.328086	0.202226	-0.118231	-0.0640508	-0.10419	0.192164	-0.0704122	0.389599	0.238151	0.416113	-0.134505	0.0109032	-0.175763	-0.199563	0.14628	0.094263	-0.42796	0.561363
Cer.20.0.2O.26.0	grey	Sphingolipids	Ceramides	DHCer	-0.185332	-0.272517	-0.432282	-0.36759	0.0483829	0.133324	-0.230916	-0.076148	-0.0715952	0.203092	-0.0102223	0.239648	0.144065	0.441545	0.0132069	-0.00580244	-0.18734	-0.157864	-0.0225292	0.0672635	-0.24795	0.419936
Cer.20.0.3O.24.0..2OH.	grey	Sphingolipids	Ceramides	PhytoCer	-0.237981	-0.173603	-0.143353	-0.244362	0.41981	0.134241	-0.119548	-0.0551228	-0.149258	0.146919	0.0137866	0.218051	0.0828126	0.144115	-0.129064	0.13224	-0.0638909	-0.227475	0.000736053	0.0521799	-0.353285	0.445992
Cer.22.0.2O.26.0	grey	Sphingolipids	Ceramides	DHCer	-0.340858	-0.211802	-0.236612	-0.163749	0.267756	0.248719	-0.0326264	-0.0818616	-0.153446	-0.0529078	-0.221689	0.372253	0.181972	0.268566	-0.0433968	0.0223759	-0.0608348	-0.124509	0.026658	0.226001	-0.137816	0.483204
Cer.d34.0	grey	Sphingolipids	Ceramides	DHCer	-0.316001	-0.0388046	-0.162021	-0.0995387	0.0881738	0.0607896	-0.0457034	-0.33647	-0.32821	-0.11539	-0.032381	0.275556	0.363256	0.0911917	0.538922	0.259157	0.311717	0.147339	0.175869	0.246499	-0.0825241	0.38154
Cer.d34.2.Isomer.A	grey	Sphingolipids	Ceramides	Cer	-0.410465	-0.173034	-0.353365	-0.267751	0.411598	0.203979	-0.0892397	-0.426341	-0.358698	0.0566342	-0.063112	0.390697	0.360817	0.415944	0.20315	0.203838	0.0274608	-0.131315	0.106612	0.224177	-0.296492	0.735543
Cer.d36.2	grey	Sphingolipids	Ceramides	Cer	-0.34268	-0.295696	-0.317917	-0.264765	0.00593266	0.0805995	-0.184154	-0.137673	-0.114407	0.115557	-0.0903079	0.107462	0.335614	0.41936	0.49508	0.194874	0.110032	0.208369	0.437333	0.179832	-0.0966825	0.270644
Cer.d39.1	grey	Sphingolipids	Ceramides	Cer	-0.047671	-0.00197158	-0.0356969	-0.0266609	-0.119133	-0.237843	-0.403867	-0.288007	-0.123425	-0.0520709	0.0946586	-0.0623189	0.27063	-0.0475856	0.552382	0.253103	0.276114	0.337518	0.31849	0.079664	0.0664843	0.0298393
Cer.d40.0	grey	Sphingolipids	Ceramides	DHCer	-0.0719057	-0.0114768	0.14161	0.122404	0.209328	0.226656	0.265016	-0.313616	-0.260546	-0.424796	-0.373807	0.416065	0.241744	0.133453	0.245055	0.0692169	0.062326	-0.179516	-0.329392	0.230989	0.108626	0.254941
Cer.d41.1	grey	Sphingolipids	Ceramides	Cer	0.100625	0.301868	0.24833	0.474048	-0.224567	-0.150721	0.0283377	-0.189707	-0.248961	-0.531544	-0.310989	0.0776057	0.207382	-0.286635	0.537714	0.424708	0.351488	0.628188	0.326375	0.215622	0.428708	-0.0422043
Cer.d41.2	grey	Sphingolipids	Ceramides	Cer	-0.103198	-0.148532	-0.117092	0.02488	-0.166517	-0.011037	-0.217338	-0.0740018	-0.128963	-0.0461293	-0.092976	0.00957227	0.398767	0.119731	0.586306	0.534254	0.176606	0.313607	0.435567	0.240833	0.152793	0.0939996
Cer.d42.0	grey	Sphingolipids	Ceramides	DHCer	0.0172377	0.0835215	0.152907	0.202307	0.253706	0.204757	0.233958	-0.367276	-0.345857	-0.483693	-0.390301	0.356625	0.265459	0.0825054	0.358781	0.18559	0.0823838	-0.160655	-0.279536	0.239968	0.12078	0.30493
Cer.d43.1	grey	Sphingolipids	Ceramides	Cer	-0.0731709	0.0669672	-0.0621079	0.143245	0.130308	-0.0168014	-0.0757862	-0.339903	-0.411968	-0.318616	-0.292225	0.296986	0.352593	0.0557866	0.522432	0.41194	0.240223	0.263303	0.193365	0.258171	0.0256285	0.42935
Cer.d43.2	grey	Sphingolipids	Ceramides	Cer	-0.215292	0.0809057	-0.162926	0.0145309	0.136854	0.113947	-0.043927	-0.308925	-0.265784	-0.0881966	-0.0880966	0.275062	0.189687	0.165241	-0.0157856	0.0255858	-0.0208749	0.0754642	0.117625	0.197924	0.0180139	0.369992
Cer.d44.1	grey	Sphingolipids	Ceramides	Cer	-0.0856313	0.135781	0.0420125	0.162381	0.148335	-0.100456	-0.117939	-0.449393	-0.484499	-0.330289	-0.125383	0.160412	0.411203	0.0113158	0.600554	0.620306	0.315222	0.134082	0.199973	0.0670737	-0.0626943	0.348374
Cer.d44.2	grey	Sphingolipids	Ceramides	Cer	-0.279673	-0.183339	-0.412212	-0.354301	0.1581	0.0219417	-0.306264	-0.171182	-0.134206	0.234324	0.0688744	0.328064	0.27369	0.430118	0.0142278	0.132229	-0.0604529	-0.164006	0.0881463	0.065739	-0.294392	0.493394
Cer.d46.1	grey	Sphingolipids	Ceramides	Cer	-0.271664	-0.229652	-0.316545	-0.270229	0.26422	0.265156	-0.101176	-0.369249	-0.319315	0.018752	-0.0796418	0.323924	0.234628	0.272935	0.0643575	-0.0594516	-0.118917	-0.229025	-0.107636	0.0778627	-0.218772	0.655974
Cer.d46.2	grey	Sphingolipids	Ceramides	Cer	-0.340868	-0.257702	-0.27742	-0.142829	0.281066	0.215173	0.00587191	-0.232506	-0.187382	0.0808497	-0.0114205	0.298955	0.221222	0.10778	-0.00253208	-0.0073419	-0.114272	-0.0539808	0.061375	0.0105086	-0.00723322	0.466848
Cer.NDS.d39.0	grey	Sphingolipids	Ceramides	Cer	-0.101758	-0.0162947	-0.227613	-0.126174	0.310433	0.130125	-0.0630208	-0.403562	-0.356692	-0.168112	-0.184213	0.34391	0.200994	0.216425	0.0506016	0.0778764	-0.0169738	-0.152066	-0.00858684	0.167668	-0.227421	0.582176
Cer.NDS.d40.0	grey	Sphingolipids	Ceramides	DHCer	-0.173296	-0.102321	-0.124036	-0.0735496	0.240824	0.233232	0.223706	-0.272408	-0.237585	-0.282272	-0.309181	0.477569	0.361025	0.400458	0.304128	0.00773087	0.000319908	-0.280223	-0.218852	0.283027	-0.114135	0.374875
Cer.NDS.d41.0	grey	Sphingolipids	Ceramides	Cer	-0.0573839	0.171133	-0.0178664	0.133773	0.269759	0.183217	0.297749	-0.421476	-0.42694	-0.399864	-0.41447	0.482598	0.308934	0.243915	0.194387	-0.0981172	-0.149893	-0.110415	-0.0846181	0.335201	0.0035175	0.498694
Cer.NDS.d43.0	grey	Sphingolipids	Ceramides	Cer	-0.409474	-0.286098	-0.423727	-0.361324	0.240956	0.24353	-0.0374284	-0.281184	-0.26875	0.0686012	-0.0620892	0.356698	0.291398	0.37764	0.0125552	-0.0295396	-0.0951746	-0.197592	0.0482708	0.178771	-0.280536	0.591732
Cer.NP.t42.0	grey	Sphingolipids	Ceramides	PhytoCer	-0.00553503	0.293278	0.307238	0.34275	0.0907774	-0.127981	0.0411643	-0.174098	-0.290118	-0.319832	-0.292143	0.154188	0.0622982	-0.150019	0.237284	0.276694	0.196336	0.367805	0.272394	0.159584	-0.00222259	0.171892
Cholesterol	grey	Sterol Lipids	Sterols	Cholesterols	-0.0714205	0.115699	-0.098053	-0.0167145	0.171016	0.0490091	-0.108843	-0.416197	-0.471592	-0.0477376	0.00885048	0.311121	0.243864	0.101186	0.259425	0.183772	0.194444	0.112164	0.108758	0.0295277	-0.293336	0.581016
cholesterol.3.sulfate	grey	Sterol Lipids	Sterols	Cholesterols	-0.45226	-0.31636	-0.336519	-0.385504	0.252213	0.228348	-0.135528	-0.280062	-0.206666	-0.0811069	-0.0748681	0.274034	0.176505	0.152206	0.0687766	0.00638991	0.111566	0.0788197	0.173337	0.281507	-0.131887	0.477966
cis.13.docosenoic.acid	grey	Fatty Acyls	Fatty acids	Unsaturated FA	-0.200037	-0.152492	-0.321971	-0.280727	-0.0559342	0.07938	-0.164845	-0.0959432	-0.126109	0.109264	0.053041	0.204493	0.0364442	0.211293	0.00329003	-0.144349	0.0930783	0.280262	0.195315	0.0564669	-0.195445	0.32841
DG.18.1_18.2	grey	Glycerolipids	Diradylglycerols	DAG	0.424897	0.585619	0.514782	0.370724	-0.0459806	-0.359925	0.0404217	0.2223	0.0837162	-0.0252509	0.0628878	-0.143021	-0.371603	-0.345318	-0.169338	-0.0244755	0.206241	0.177049	0.031334	-0.0553317	-0.110648	-0.365185
DG.34.1	grey	Glycerolipids	Diradylglycerols	DAG	0.179057	0.29245	0.52028	0.528958	0.000886335	-0.24025	0.217475	-0.29431	-0.314135	-0.37944	-0.0828475	0.347665	0.116884	-0.20647	0.142694	0.129511	0.180079	0.0380237	-0.212589	0.0775874	0.082603	0.093319
docosanamide	grey	Fatty Acyls	Fatty amides	Primary amides	0.114288	0.0853262	0.0475401	0.00453257	0.0947418	-0.17744	-0.219617	-0.152531	-0.125994	-0.126075	-0.011738	0.169686	0.096279	0.137756	-0.0461607	0.121832	-0.00574763	-0.156478	-0.0490309	0.107674	-0.269143	0.272704
FA.14.0..myristic.acid.	grey	Fatty Acyls	Fatty acids	Saturated FA	-0.191845	-0.296218	-0.420793	-0.212415	0.177636	0.591355	0.333019	-0.108503	-0.194038	-0.108685	-0.374304	0.160728	0.102791	0.296942	-0.187196	-0.39862	-0.529885	-0.220259	-0.000791492	0.0278212	0.0561262	0.456135
FA.14.1..physeteric.acid.	grey	Fatty Acyls	Fatty acids	Unsaturated FA	-0.212446	-0.177064	-0.418173	-0.269855	-0.0453776	0.305461	0.16365	-0.0359051	-0.0801841	-0.0238104	-0.12536	0.139923	0.0361338	0.211347	-0.0790743	-0.25091	-0.0554975	0.141038	0.309482	0.0867179	-0.0762491	0.252226
FA.15.0..pentadecylic.acid.	grey	Fatty Acyls	Fatty acids	Saturated FA	-0.105815	-0.197197	-0.353952	-0.302817	0.353384	0.435994	-0.0231584	0.0420115	-0.0376642	0.0566473	-0.220243	0.015549	-0.0797516	-0.00732625	-0.153486	-0.22065	-0.199145	-0.0368544	0.14605	-0.114004	-0.201127	0.423398
FA.15.1	grey	Fatty Acyls	Fatty acids	Unsaturated FA	-0.220222	-0.104608	-0.403705	-0.306242	0.0616661	0.184982	-0.0374576	-0.119404	-0.13357	0.0393019	0.00733037	0.171743	0.00218175	0.132855	-0.0957305	-0.104223	0.0856834	0.141341	0.237835	0.0170323	-0.154818	0.36525
FA.16.1..palmitoleic.acid.	grey	Fatty Acyls	Fatty acids	Unsaturated FA	-0.0246805	0.0112412	-0.356195	-0.0647662	-0.0503175	0.224141	0.0599523	-0.0752551	-0.156	-0.118506	-0.255797	0.122761	-0.0765283	0.254179	-0.170915	-0.0951337	-0.157018	-0.028513	0.113938	0.0221783	0.00345653	0.380404
FA.17.0..margaric.acid.	grey	Fatty Acyls	Fatty acids	Saturated FA	-0.352333	-0.149674	-0.268503	-0.146845	0.318419	0.290107	0.0211843	-0.38308	-0.477959	-0.174646	-0.156388	0.350867	0.318935	0.0506878	0.304364	0.0930285	0.0914613	0.113562	0.214889	-0.0487316	-0.199869	0.620388
FA.18.1..oleic.acid.	grey	Fatty Acyls	Fatty acids	Unsaturated FA	-0.185851	-0.0994814	-0.0537923	-0.0695214	0.059133	-0.051949	-0.132081	-0.379227	-0.295978	-0.107136	-0.0169275	0.170459	0.240665	0.543021	0.15358	0.189148	-0.280662	-0.405708	-0.172172	0.0839784	-0.123461	0.304822
FA.19.1	grey	Fatty Acyls	Fatty acids	Unsaturated FA	-0.220101	-0.0144474	-0.259067	0.0383575	0.295803	0.378523	0.336513	-0.352963	-0.476194	-0.30363	-0.448554	0.329284	0.216021	0.37027	0.143078	-0.0436429	-0.173157	-0.196179	0.0570485	0.231756	-0.064699	0.648009
FA.20.2..eicosadienoic.acid.	grey	Fatty Acyls	Fatty acids	Unsaturated FA	-0.236646	-0.159448	-0.357453	-0.199415	0.0495661	0.0927809	-0.0362521	-0.384995	-0.299088	0.0257415	-0.0914272	0.359123	0.339955	0.714993	0.224838	0.160259	-0.100055	-0.416295	-0.166978	0.106659	-0.260145	0.477874
FA.22.0..behenic.acid.	grey	Fatty Acyls	Fatty acids	Saturated FA	-0.250406	-0.267503	-0.430883	-0.319802	0.410991	0.380906	-0.0564434	-0.0385155	-0.155224	0.0186046	-0.235726	0.238379	0.0817794	0.193014	-0.115071	-0.186494	-0.170226	-0.0868199	0.0678607	0.00331846	-0.185791	0.586132
FA.22.1..erucic.acid.	grey	Fatty Acyls	Fatty acids	Unsaturated FA	-0.198477	0.1782	-0.0355209	0.145463	0.396701	-0.0156726	0.0726669	-0.434574	-0.42067	-0.26312	-0.342637	0.332849	0.259971	0.264144	0.133221	0.156584	0.0238615	0.00218918	0.201997	0.272039	-0.100121	0.63843
FA.22.2..docosadienoic.acid.	grey	Fatty Acyls	Fatty acids	Unsaturated FA	-0.096297	-0.0135891	-0.263001	-0.00509158	0.0662334	0.2051	0.141003	-0.225851	-0.287674	-0.0269	-0.0903917	0.242094	0.0293631	0.254226	-0.0788532	-0.0210409	-0.127104	-0.12807	0.00282393	0.127281	-0.232417	0.501414
FA.23.0	grey	Fatty Acyls	Fatty acids	Saturated FA	-0.252384	-0.197558	-0.288101	-0.224338	0.520306	0.49449	0.0497029	-0.100249	-0.207449	-0.00510738	-0.239011	0.180678	0.135664	0.152772	0.0155662	-0.0188225	-0.255157	-0.240978	-0.0390239	-0.0567512	-0.286504	0.574305
FA.24.1..nervonic.acid.	grey	Fatty Acyls	Fatty acids	Unsaturated FA	-0.376418	-0.098845	-0.170371	-0.105563	0.519382	0.199195	0.0237776	-0.514328	-0.514038	-0.191575	-0.268309	0.347176	0.381164	0.368204	0.199263	0.155218	-0.0265372	-0.190956	0.0346905	0.372182	-0.229767	0.788594
FA.28.0..montanic.acid.	grey	Fatty Acyls	Fatty acids	Saturated FA	0.0650553	0.0484018	-0.258687	-0.144124	0.264751	0.257561	-0.0708765	0.205128	0.0418496	0.0951903	-0.205094	0.0451774	-0.179339	-0.0374495	-0.236238	-0.176993	-0.159023	0.0504888	0.228114	-0.0775961	-0.265654	0.361487
FA.30.0	grey	Fatty Acyls	Fatty acids	Saturated FA	0.0743814	0.0739851	-0.353646	-0.143527	0.106396	0.22313	-0.0334891	0.0699774	-0.0852603	0.0288012	-0.237019	0.181653	-0.0856232	0.0577229	-0.0620067	-0.206882	-0.0218065	0.250181	0.282617	-0.0562998	-0.197224	0.404207
FA.32.0	grey	Fatty Acyls	Fatty acids	Saturated FA	0.240246	0.252518	-0.055304	0.0988194	0.12954	0.226828	-0.00115391	0.102101	-0.116202	-0.109727	-0.254521	0.0307341	-0.283904	-0.166114	-0.273823	-0.212067	-0.0399509	0.264957	0.151706	-0.0587224	-0.0776189	0.263726
FAHFA.18.0.20.2	grey	Fatty Acyls	Fatty esters	FAHFA	-0.163803	-0.244807	-0.235398	-0.243474	0.145322	0.219036	-0.0774676	0.141337	0.0387413	0.0547448	-0.0423328	0.018754	-0.0738808	0.0240963	-0.183897	-0.10178	-0.261621	-0.204246	-0.14809	0.00353109	-0.0652587	0.172098
FAHFA.38.4	grey	Fatty Acyls	Fatty esters	FAHFA	-0.132184	-0.111893	0.017496	-0.0455662	-0.0451363	-0.125894	-0.138011	-0.295654	-0.177883	-0.0394621	0.0647217	0.057025	0.189944	0.455776	0.158473	0.196963	-0.235891	-0.346956	-0.212562	0.055843	0.00844989	0.0975942
GlcCer.d34.1	grey	Sphingolipids	Glycosphingolipids	HexCer	-0.400466	-0.0957527	-0.000451556	-0.00747925	0.159498	-0.220004	-0.0448676	-0.467043	-0.432694	-0.0488652	0.170429	0.194919	0.378602	0.125422	0.41552	0.52615	0.2445	-0.134426	-0.0432579	0.217249	0.0355154	0.25487
GlcCer.d40.1	grey	Sphingolipids	Glycosphingolipids	HexCer	-0.00116832	0.22802	0.274567	0.153836	0.16757	-0.232514	0.0318774	-0.193011	-0.0721193	-0.150749	-0.0048788	0.127842	0.0716366	-0.278675	0.0123061	0.0503935	0.201237	0.21091	-0.00611036	0.131648	-0.0767386	0.183797
GlcCer.d41.1	grey	Sphingolipids	Glycosphingolipids	HexCer	-0.091373	0.0639605	0.0812276	0.0610501	0.109155	0.0627664	-0.0254077	-0.119586	-0.0273044	-0.232714	-0.251374	0.29352	0.237695	-0.0354113	-0.0744414	-0.131112	0.0803667	0.260436	0.193754	0.228511	-0.0533166	0.339376
GlcCer.d42.1	grey	Sphingolipids	Glycosphingolipids	HexCer	-0.0804577	0.143991	0.134301	0.0456286	0.269079	-0.0263143	0.0355092	-0.328227	-0.260009	-0.224616	-0.154632	0.286823	0.151457	-0.0988201	0.153733	0.0149661	0.263932	0.164133	0.0822857	0.240359	-0.229053	0.409957
GlcCer.d42.2	grey	Sphingolipids	Glycosphingolipids	HexCer	0.0339721	0.197607	0.301906	0.218434	0.0431955	-0.17868	-0.0420738	-0.134794	-0.0560122	0.0241591	0.125633	0.107465	0.156693	-0.202969	0.108649	0.338786	0.232937	0.216762	0.108577	-0.00314181	-0.053884	0.127762
GlcCerd14.14E.20.02OH	grey	Sphingolipids	Glycosphingolipids	HexCer	-0.217886	0.0537536	-0.168031	-0.11846	-0.265585	-0.219896	-0.313751	-0.232757	-0.177302	-0.171711	0.116034	0.197121	0.368085	0.0514187	0.430709	0.391126	0.570166	0.430142	0.340016	0.355863	0.0811744	0.140773
Hex3Cer.18.1.2O.16.0	grey	Sphingolipids	Glycosphingolipids	Hex3Cer	-0.145731	-0.00999161	0.0760284	-0.0621013	0.0318576	-0.253289	-0.287792	-0.0684175	-0.0788756	-0.0792717	0.0715121	0.24426	0.341569	-0.102423	0.417609	0.353681	0.593776	0.385599	0.41036	0.273817	-0.168627	0.118215
HexCer.18.1.2O.24.0	grey	Sphingolipids	Glycosphingolipids	HexCer	-0.0527192	0.0990882	0.175286	0.156523	-0.052111	-0.150129	0.0708266	-0.312878	-0.218593	-0.240083	-0.0966937	0.391509	0.300629	-0.056902	0.309517	0.0655369	0.182984	0.330719	0.0911386	0.0847357	-0.0160656	0.27088
lactosylceramide.d18.1.24.1.15Z	grey	Sphingolipids	Neutral_glycosphingolipids	LacCer	-0.326442	-0.101803	0.0681798	0.018607	-0.0513917	-0.312813	-0.0877584	-0.362644	-0.217298	-0.0219936	0.317775	0.092117	0.295691	0.0404495	0.26025	0.41555	0.230544	-0.127346	-0.113278	0.202751	0.177337	-0.0222178
LNAPE.18.2_N.19.0	grey	Glycerophospholipids	Glycerophosphoethanolamines	LPE	-0.0650832	0.169227	0.12013	0.110805	-0.0692287	-0.366902	-0.105001	-0.0209853	-0.0135637	-0.0735058	0.00683628	0.150351	0.260255	0.0213819	0.39847	0.49598	0.386591	0.120056	0.0889024	0.173837	-0.0253086	-0.00331046
LNAPE.18.2.N.20.0	grey	Glycerophospholipids	Glycerophosphoethanolamines	LPE	-0.121329	0.0820688	0.0369706	-0.149496	0.183227	0.0409021	-0.174213	-0.0391954	-0.0721739	0.0364122	0.0820412	0.0483579	0.0236439	-0.044429	0.0251119	-0.05558	0.0779688	0.0331541	0.0672742	0.263027	-0.274814	0.281562
LPC.14.0	grey	Glycerophospholipids	Glycerophosphocholines	LPC	-0.179891	0.0376148	-0.192346	0.190115	-0.0840068	0.226928	0.382236	-0.175657	-0.263478	-0.457951	-0.461788	0.31032	0.164454	0.205236	-0.0537837	-0.161372	-0.163119	0.00870384	-0.204846	0.527443	0.593775	0.252821
LPC.15.0	grey	Glycerophospholipids	Glycerophosphocholines	LPC	-0.365446	-0.163356	-0.243701	-0.0296926	0.0328755	0.132765	0.144417	-0.277511	-0.296984	-0.434865	-0.449815	0.496713	0.423077	0.334596	0.322644	0.040246	0.0751826	0.175248	0.0556676	0.743465	0.297439	0.404687
LPC.18.2	grey	Glycerophospholipids	Glycerophosphocholines	LPC	-0.330754	-0.124803	-0.104343	-0.327374	0.0372375	0.0950297	-0.0622324	0.151845	0.171908	0.0178057	-0.0595962	0.177495	0.126718	0.401841	-0.076252	-0.202678	-0.0415823	-0.0471741	0.112883	0.59111	-0.304601	0.0636804
LPC.20.0	grey	Glycerophospholipids	Glycerophosphocholines	LPC	-0.364477	-0.0859245	-0.0886122	-0.250761	0.374184	0.0652816	-0.0730256	-0.252938	-0.316178	-0.161637	-0.119563	0.482232	0.278029	0.440727	-0.00981235	0.0605303	0.077136	-0.305506	-0.200751	0.624285	-0.26313	0.52661
LPC.20.1	grey	Glycerophospholipids	Glycerophosphocholines	LPC	-0.381398	-0.0922604	-0.0976219	-0.138965	0.273963	0.0659325	0.0817507	-0.349702	-0.341933	-0.162072	-0.148941	0.52232	0.287626	0.410721	0.130924	0.0763305	0.0900862	-0.193563	-0.121363	0.538114	-0.250807	0.587761
LPC.20.2	grey	Glycerophospholipids	Glycerophosphocholines	LPC	-0.48327	-0.25709	-0.292241	-0.262713	0.249626	0.171449	-0.0525305	-0.342805	-0.255611	-0.156197	-0.277834	0.493712	0.428368	0.690869	0.192777	0.00148384	-0.136455	-0.361278	-0.124624	0.633017	-0.184835	0.624694
LPC.20.3	grey	Glycerophospholipids	Glycerophosphocholines	LPC	-0.340095	-0.323881	-0.334886	-0.271526	-0.0998718	0.104906	-0.0225541	0.120687	0.111488	0.0152789	-0.189455	0.23777	0.339974	0.667001	0.138349	0.0819032	-0.163076	-0.212298	-0.0234944	0.554624	0.00474145	0.127642
LPC.20.4	grey	Glycerophospholipids	Glycerophosphocholines	LPC	-0.190284	-0.351613	-0.346791	-0.424705	0.00430751	0.175521	-0.0969336	0.389715	0.379898	0.179368	-0.223484	0.218778	0.183748	0.666207	-0.0978373	-0.220882	-0.234413	-0.199271	0.15554	0.370579	-0.365311	0.0529894
LPC.20.5	grey	Glycerophospholipids	Glycerophosphocholines	LPC	-0.221005	-0.264501	-0.349334	-0.36073	-0.00907748	0.185083	-0.0702467	0.316456	0.236924	0.110692	-0.249006	0.186364	0.124177	0.475369	-0.186448	-0.246236	-0.183452	-0.109176	0.18812	0.482955	-0.154285	0.148121
LPC.22.6	grey	Glycerophospholipids	Glycerophosphocholines	LPC	-0.0625682	-0.249063	-0.339234	-0.372008	-0.0180679	0.0756068	-0.0587185	0.363413	0.336018	0.250597	-0.179507	0.153887	0.0307891	0.639793	-0.252112	-0.246687	-0.339865	-0.308183	0.0483922	0.33643	-0.326008	0.0717347
LPC.32.0	grey	Glycerophospholipids	Glycerophosphocholines	LPC	-0.0944199	0.27986	0.264711	0.201135	-0.000169454	-0.264939	-0.0956667	-0.123399	-0.0616123	-0.245086	0.0324689	0.0344598	0.190224	-0.204789	0.339548	0.346604	0.450173	0.301235	0.191071	0.308338	0.0835868	-0.00369771
LPC.O.16.0	grey	Glycerophospholipids	Glycerophosphocholines	O-LPC	-0.476193	-0.25992	-0.238127	-0.201736	-0.0445282	-0.103931	-0.136214	-0.371089	-0.215654	-0.201682	-0.163085	0.585361	0.546994	0.670025	0.341083	0.22743	0.185827	-0.071139	0.0416033	0.684488	-0.0664855	0.530689
LPC.O.20.1	grey	Glycerophospholipids	Glycerophosphocholines	O-LPC	-0.273402	-0.334009	-0.31866	-0.233645	0.0554359	0.297103	0.0152251	-0.24614	-0.135647	-0.136194	-0.131778	0.250674	0.365644	0.178052	0.16105	-0.0368725	-0.11522	0.0187012	-0.0434309	0.0934659	0.139389	0.390231
LPC.O.22.0	grey	Glycerophospholipids	Glycerophosphocholines	O-LPC	-0.37594	-0.115913	-0.0489916	-0.0750084	0.20898	0.0548094	0.108544	-0.310217	-0.243182	-0.0786688	-0.0294347	0.172842	0.173307	0.200576	0.332688	0.160058	0.0966957	-0.14184	-0.157896	0.463524	-1.22559e-05	0.346755
LPC.O.24.0	grey	Glycerophospholipids	Glycerophosphocholines	O-LPC	-0.0867163	0.069444	0.229398	0.112574	0.200822	0.0791194	0.165525	-0.208648	-0.0926665	-0.132021	0.00549625	-0.0234373	0.00805422	-0.16728	0.129142	-0.042939	0.15253	0.0226768	-0.0785183	0.12173	-0.0459026	0.0724661
LPC.O.24.1	grey	Glycerophospholipids	Glycerophosphocholines	O-LPC	-0.173624	0.112362	0.139321	0.0758603	0.1319	-0.0259211	-0.0516321	-0.372948	-0.289555	-0.153159	-0.00678251	0.163243	0.195246	0.219387	0.157345	0.237243	0.09587	-0.0891882	-0.166826	0.407662	-0.0564487	0.377764
LPC.P.16.0.or.LPC.O.16.1	grey	Glycerophospholipids	Glycerophosphocholines	O-LPC	-0.513421	-0.289528	-0.201327	-0.127168	0.00856381	0.0127133	-0.161394	-0.293722	-0.175592	-0.190078	-0.125523	0.530198	0.696801	0.491997	0.448129	0.3247	0.178069	0.0460028	0.00167776	0.621894	0.119257	0.473844
LPC.p.18.0	grey	Glycerophospholipids	Glycerophosphocholines	O-LPC	-0.409151	-0.235734	-0.207917	-0.183228	0.103211	-0.0291306	-0.0969646	-0.359541	-0.200418	-0.258771	-0.253347	0.614098	0.636478	0.613925	0.388069	0.178165	0.158435	0.0272949	0.163996	0.614654	-0.117248	0.587051
LPC.P.18.0.or.LPC.O.18.1	grey	Glycerophospholipids	Glycerophosphocholines	O-LPC	-0.420235	-0.202024	-0.202834	-0.209257	0.000875732	-0.0393752	-0.0645464	-0.32651	-0.239654	-0.154036	-0.110317	0.539617	0.319478	0.586938	0.0613138	0.0314419	0.0965978	-0.18756	-0.112811	0.702716	-0.0714009	0.492268
LPE.16.0	grey	Glycerophospholipids	Glycerophosphoethanolamines	LPE	-0.471667	-0.477489	-0.570743	-0.639806	-0.0933892	-0.120214	-0.471188	-0.398818	-0.203042	0.324117	0.350043	0.311174	0.512499	0.61547	0.297118	0.148668	0.191598	-0.16443	0.0413458	0.186672	-0.311045	0.448301
LPE.18.0	grey	Glycerophospholipids	Glycerophosphoethanolamines	LPE	-0.379063	-0.202993	-0.259425	-0.196962	-0.200115	-0.165728	-0.249195	-0.465823	-0.247332	0.171236	0.269005	0.264449	0.528878	0.603682	0.370302	0.28231	0.0842696	-0.175848	-0.0694632	0.18634	-0.0704676	0.324387
LPE.18.1	grey	Glycerophospholipids	Glycerophosphoethanolamines	LPE	-0.554265	-0.573059	-0.485478	-0.575034	-0.154745	-0.115087	-0.408826	-0.195368	-0.0328757	0.407787	0.443344	0.245133	0.36121	0.620015	0.23619	0.119101	0.189508	-0.204178	0.0366607	0.214237	-0.299182	0.185137
LPE.18.2	grey	Glycerophospholipids	Glycerophosphoethanolamines	LPE	-0.492248	-0.436455	-0.381951	-0.488601	0.0363022	0.016823	-0.306636	-0.0721268	0.0311989	0.301402	0.220696	0.148271	0.282331	0.584525	0.209011	0.086334	0.0436329	-0.185886	0.113121	0.345453	-0.369995	0.151208
LPE.20.4	grey	Glycerophospholipids	Glycerophosphoethanolamines	LPE	-0.319377	-0.537117	-0.504848	-0.640111	-0.00151921	0.150515	-0.252265	0.258502	0.295033	0.452622	0.086324	0.15038	0.162918	0.685536	-0.037249	-0.140522	-0.138426	-0.246658	0.166345	0.146764	-0.499206	0.107964
LPE.22.6	grey	Glycerophospholipids	Glycerophosphoethanolamines	LPE	-0.223477	-0.486873	-0.500241	-0.623194	2.95856e-06	0.196262	-0.263249	0.170262	0.243525	0.412293	0.00622635	0.152697	0.137649	0.66464	-0.122956	-0.188378	-0.276137	-0.330231	0.0381318	0.148418	-0.390745	0.227627
LPE.O.16.1	grey	Glycerophospholipids	Glycerophosphoethanolamines	O-LPE	-0.494024	-0.324019	-0.346789	-0.286924	-0.22209	-0.112587	-0.253087	-0.315735	-0.201986	0.169957	0.282203	0.526039	0.663684	0.480059	0.515672	0.414246	0.322836	0.0879512	0.135128	0.316675	-0.00730544	0.364982
LPE.O.18.1	grey	Glycerophospholipids	Glycerophosphoethanolamines	O-LPE	-0.445015	-0.434573	-0.457282	-0.45021	-0.253705	-0.128402	-0.351057	-0.297955	-0.0882863	0.287444	0.285998	0.44627	0.622984	0.659828	0.371006	0.242292	0.12624	-0.0418092	0.119047	0.206077	-0.169046	0.323714
LPI.18.0	grey	Glycerophospholipids	Glycerophosphoinositols	LPI	-0.385341	-0.150426	-0.2889	-0.127125	0.163359	0.272424	0.0217678	-0.364221	-0.434182	-0.342846	-0.431332	0.416099	0.408562	0.583752	0.224821	0.11293	-0.0541499	-0.201527	0.0544503	0.544226	-0.141424	0.644557
LPS.18.0	grey	Glycerophospholipids	Glycerophosphoserines	LPS	-0.57987	-0.447424	-0.508525	-0.46193	0.0770733	0.18535	-0.201928	-0.344698	-0.244664	0.00273118	-0.0695572	0.480393	0.576876	0.793904	0.250035	0.0397513	-0.0278703	-0.2516	0.0896077	0.444544	-0.358336	0.602165
MGDG.16.0_20.5	grey	Glycerolipids	Glycosyldiradylglycerols	MGDG	-0.190772	0.0609733	-0.157264	-0.184159	0.0752089	-0.193203	-0.249575	-0.270017	-0.286418	0.0860948	0.154344	0.281053	0.27346	0.115751	0.27151	0.324478	0.446356	0.185579	0.354207	0.195833	-0.30511	0.370712
N.docosanoyl.4.sphingenyl.1.O.phosphorylcholine	grey	Sphingolipids	Phosphosphingolipids	SM	0.192913	0.0824465	-0.001877	-0.21152	-0.302663	-0.443832	-0.522591	0.517293	0.527552	0.458516	0.345217	-0.213891	0.0132865	0.00403153	0.0824053	0.428244	0.278287	0.254895	0.442888	-0.0980168	-0.302213	-0.410729
OxPC.36.3.1O	grey	Glycerophospholipids	Glycerophosphocholines	PC	0.0521571	0.308536	0.256673	0.200083	-0.00970526	-0.150241	-0.113922	-0.242875	-0.296205	-0.362392	0.0464238	-0.0746557	-0.0804588	-0.47765	0.147806	0.147751	0.37999	0.325197	0.00515898	0.0414522	0.242858	0.0127302
PA.18.1_18.1	grey	Glycerophospholipids	Glycerophosphates	PA	-0.334928	-0.0718508	-0.130103	0.0153751	0.0676066	-0.012392	0.0417605	-0.462822	-0.47244	-0.251801	-0.117828	0.456138	0.400731	0.199756	0.359696	0.270871	0.270055	0.177323	0.0713818	0.31622	0.0405864	0.51946
palmitoyl.ethanolamide	grey	Fatty Acyls	Fatty amides	NAE	-0.582441	-0.426334	-0.513172	-0.435588	0.193121	0.102831	-0.206208	-0.346458	-0.335927	0.152031	0.0330878	0.48845	0.522386	0.580046	0.248022	0.121902	0.107094	-0.106693	0.136616	0.319888	-0.238752	0.69258
PC.16.0_18.2	grey	Glycerophospholipids	Glycerophosphocholines	PC	-0.000174817	0.298216	0.0802355	0.122839	0.087965	-0.132978	-0.0998433	-0.0724401	-0.139048	-0.213239	-0.145788	0.157258	0.196961	-0.0796877	0.184955	0.1883	0.125709	0.214273	0.19625	0.19604	-0.0904546	0.266905
PC.16.0_22.6	grey	Glycerophospholipids	Glycerophosphocholines	PC	0.339368	0.0254958	-0.0828414	-0.169594	0.120415	0.00536622	-0.0245054	0.40816	0.302931	0.328051	-0.111134	-0.0952172	-0.321934	0.069457	-0.419424	-0.235958	-0.307537	-0.24203	-0.0195757	-0.169764	-0.44815	0.0541372
PC.16.0_5.oxovaleryl	grey	Glycerophospholipids	Glycerophosphocholines	PC	0.420105	0.317854	0.150389	0.277173	0.0840881	0.230201	0.335995	0.268629	-0.044723	-0.203122	-0.411253	-0.0586469	-0.41921	-0.331895	-0.182896	-0.171012	-0.0982549	0.252895	0.186237	-0.0490032	0.0331205	-0.050371
PC.16.0_azealic.acid..PCPAz.PC.	grey	Glycerophospholipids	Glycerophosphocholines	PC	0.151181	0.432826	0.200365	0.401354	0.1242	0.0550722	0.260299	-0.313215	-0.518435	-0.490622	-0.430664	0.207383	-0.100983	-0.170184	0.00710169	0.0722014	0.0318042	0.136629	-0.0122302	0.268547	0.184279	0.337213
PC.16.0_glutaric.acid	grey	Glycerophospholipids	Glycerophosphocholines	PC	0.421238	0.422042	0.208046	0.372721	0.0200103	0.101932	0.302645	0.134529	-0.151044	-0.304937	-0.444797	0.0741612	-0.222058	-0.290344	0.0241729	0.0251316	0.0520952	0.332344	0.179084	0.0909055	0.127323	-0.00245292
PC.16.0.9.0.CHO	grey	Glycerophospholipids	Glycerophosphocholines	PC	0.0799271	0.245706	0.0331655	0.235583	0.123386	0.242586	0.294623	-0.0601254	-0.309389	-0.428518	-0.555897	0.267789	-0.0815816	0.0703925	-0.137958	-0.058653	-0.130585	0.0705323	0.126315	0.416816	0.0345575	0.330026
PC.18.0_18.1	grey	Glycerophospholipids	Glycerophosphocholines	PC	-0.0542079	0.205033	0.304701	0.229497	-0.189355	-0.197973	0.0550043	-0.0703026	-0.0573755	-0.185272	0.209412	-0.0432525	-0.118048	-0.361522	-0.0230753	0.0181778	0.243951	0.17889	-0.116664	0.253554	0.322504	-0.153749
PC.19.1	grey	Glycerophospholipids	Glycerophosphocholines	PC	0.270462	0.3848	0.289673	0.22891	-0.0372663	-0.23845	-0.0244112	-0.134554	-0.113028	-0.0476004	0.283031	-0.312564	-0.362823	-0.539689	-0.105251	0.0633934	0.181356	0.0890588	-0.152139	-0.250432	0.0930996	-0.23766
PC.19.2	grey	Glycerophospholipids	Glycerophosphocholines	PC	0.26788	0.372638	0.290211	0.173705	-0.0659159	-0.184765	-0.0542804	0.0235211	0.0575907	-0.00500601	0.242567	-0.373016	-0.421247	-0.506578	-0.182089	0.00397908	0.127697	0.0737565	-0.121245	-0.271496	0.0542054	-0.324387
PC.21.4	grey	Glycerophospholipids	Glycerophosphocholines	PC	0.0874048	0.0983443	0.0918215	-0.0656749	-0.00845353	0.0413709	-0.0839194	0.1518	0.191061	0.0387083	0.0484576	-0.197954	-0.299133	-0.130573	-0.237456	-0.134648	-0.0838362	-0.0653536	-0.0947145	-0.167777	-0.11822	-0.196502
PC.24.0	grey	Glycerophospholipids	Glycerophosphocholines	PC	0.324186	0.548877	0.373981	0.523737	-0.0400664	-0.170097	0.112388	-0.259311	-0.373314	-0.415595	-0.158213	-0.025712	-0.150537	-0.561799	0.0647774	0.154818	0.25728	0.392418	0.0278574	0.0209556	0.40027	0.0279387
PC.30.0	grey	Glycerophospholipids	Glycerophosphocholines	PC	-0.288531	-0.0754981	-0.217677	0.0508092	0.16067	0.138631	0.188114	-0.326739	-0.367289	-0.320774	-0.383491	0.32933	0.273981	0.171827	0.241501	0.0740304	-0.111282	0.0814025	0.21592	0.3822	0.166978	0.517222
PC.30.6	grey	Glycerophospholipids	Glycerophosphocholines	PC	0.0205202	-0.00840947	-0.0959556	-0.0560108	0.14318	0.214361	0.159402	0.0954261	-0.078052	-0.170205	-0.353212	0.208722	-0.0376171	0.201889	-0.204801	-0.0988302	-0.231248	-0.158382	-0.00363205	0.371252	-0.235565	0.314555
PC.31.0	grey	Glycerophospholipids	Glycerophosphocholines	PC	-0.177644	-0.159431	-0.189455	-0.00258435	-0.437604	0.0104255	-0.0242703	-0.0230951	0.127878	-0.0391171	0.0739823	-0.0221041	0.251628	-0.0394413	0.326814	0.0588542	0.0345011	0.333317	0.0768761	0.205914	0.611606	-0.289034
PC.32.0	grey	Glycerophospholipids	Glycerophosphocholines	PC	-0.00656839	0.327805	0.283828	0.293458	-0.00726896	-0.278059	-0.0536244	-0.230241	-0.214226	-0.291617	0.0390325	0.275917	0.262109	-0.213068	0.280103	0.385044	0.41621	0.215881	0.073151	0.406588	0.211491	0.0627052
PC.32.2	grey	Glycerophospholipids	Glycerophosphocholines	PC	0.286626	0.321835	0.0335115	0.329	-0.460626	-0.122412	0.122191	0.0626114	0.0373728	-0.291178	-0.131259	-0.170806	-0.236899	-0.271646	-0.190406	-0.0909565	-0.0519487	0.152389	-0.26267	-0.0434507	0.752112	-0.339106
PC.33.0	grey	Glycerophospholipids	Glycerophosphocholines	PC	-0.0854031	0.0470654	0.100757	0.14163	-0.265967	-0.172505	-0.058324	-0.0486597	0.0270011	-0.159388	0.0892516	-0.0342367	0.0516513	-0.3018	0.281263	0.0664959	0.288677	0.41377	0.123645	0.258724	0.470076	-0.332911
PC.33.2	grey	Glycerophospholipids	Glycerophosphocholines	PC	0.299766	0.202773	0.0185531	0.171249	-0.535426	-0.166741	-0.0772416	0.316627	0.34211	-0.16544	-0.114544	-0.275875	-0.173455	-0.236684	0.0957121	0.00969843	0.0331949	0.439955	0.0970746	-0.00441161	0.506618	-0.572539
PC.33.3	grey	Glycerophospholipids	Glycerophosphocholines	PC	-0.233135	-0.225467	-0.192086	-0.247308	0.0595586	0.0560819	-0.210878	-0.188791	-0.184907	0.187015	0.240533	0.272448	0.422184	0.232841	0.296231	0.249657	0.288286	0.00980752	0.235682	-0.00379981	-0.415473	0.362232
PC.34.0	grey	Glycerophospholipids	Glycerophosphocholines	PC	-0.129192	0.0376725	0.216405	-0.0677612	-0.0331765	-0.194754	-0.204214	0.0250056	0.119232	-0.0391027	0.209794	0.131368	0.052984	-0.180287	0.193527	0.0109382	0.560102	0.278143	0.0890987	0.351933	-0.0531367	-0.247631
PC.34.1	grey	Glycerophospholipids	Glycerophosphocholines	PC	0.0903258	0.206759	0.295484	0.476286	-0.201357	-0.21956	0.111615	-0.231331	-0.289005	-0.385724	-0.0254062	0.00694479	0.000219176	-0.343326	0.0684482	0.15399	0.0591211	0.150364	-0.188268	0.180198	0.642048	-0.0454801
PC.34.2	grey	Glycerophospholipids	Glycerophosphocholines	PC	0.128626	0.364024	0.0671801	0.145968	-0.0784124	-0.173512	-0.0819836	0.123512	0.0317998	-0.148423	-0.131452	-0.0408568	0.0413699	-0.114324	0.0610097	0.152021	0.0336059	0.249871	0.196264	0.15301	0.0520609	0.0373374
PC.34.3.Isomer.B	grey	Glycerophospholipids	Glycerophosphocholines	PC	0.277655	0.249909	0.0875835	0.264186	-0.545838	-0.238079	-0.00819437	0.391447	0.381187	-0.109073	-0.020368	-0.200705	-0.164572	-0.205658	-0.152216	-0.0621291	-0.0882445	0.208269	-0.0951801	0.05135	0.59975	-0.607857
PC.34.4	grey	Glycerophospholipids	Glycerophosphocholines	PC	0.380934	0.0971745	-0.0607713	0.155309	-0.331163	0.0299749	0.180532	0.349975	0.291284	0.0290508	-0.156186	-0.051269	-0.268104	-0.0648253	-0.279654	-0.270113	-0.275078	-0.0112234	-0.27573	-0.236746	0.42304	-0.36735
PC.35.2	grey	Glycerophospholipids	Glycerophosphocholines	PC	-0.234412	-0.0791265	-0.0542298	-0.0767833	0.0332561	0.123497	-0.0447245	-0.02499	-0.00460293	-0.0678766	-0.0492764	0.0673501	0.0205024	-0.0365412	0.0950074	-0.152836	0.146613	0.280617	0.289871	0.275513	-0.0110359	0.0348256
PC.35.2.Isomer.B	grey	Glycerophospholipids	Glycerophosphocholines	PC	0.251261	0.172855	0.180046	0.0721532	-0.422386	-0.227486	-0.258456	0.516344	0.542779	0.0408578	0.09393	-0.342992	-0.220692	-0.26249	0.00470231	0.0485388	0.143363	0.372985	0.18009	0.0177661	0.20399	-0.709683
PC.35.3	grey	Glycerophospholipids	Glycerophosphocholines	PC	0.205605	0.113143	0.01629	0.205233	-0.530089	-0.182364	-0.0660362	0.380363	0.36483	-0.0443073	0.00559432	-0.235905	-0.124849	-0.0995265	-0.0145748	0.0378778	-0.149395	0.158771	-0.0663383	0.0876496	0.504839	-0.552685
PC.35.4	grey	Glycerophospholipids	Glycerophosphocholines	PC	0.271259	0.020417	-0.0350696	-0.114338	0.180305	-0.046081	0.0515084	0.514862	0.355825	0.286746	-0.0719749	-0.0510233	-0.299979	0.103776	-0.360923	-0.144835	-0.263387	-0.358716	-0.0907208	-0.181663	-0.303232	-0.140939
PC.36.0	grey	Glycerophospholipids	Glycerophosphocholines	PC	-0.235082	-0.115799	0.150443	-0.0864643	-0.0152876	-0.239356	-0.160245	-0.164794	0.0437181	-0.00320451	0.330843	0.123314	0.116819	-0.0287255	0.103833	0.107848	0.3879	-0.0728384	-0.194186	0.158824	0.021518	-0.182179
PC.36.1	grey	Glycerophospholipids	Glycerophosphocholines	PC	-0.0369623	0.188493	0.333023	0.207335	-0.129182	-0.238761	-0.00918084	0.031007	-0.00732847	-0.122903	0.233641	-0.0702825	-0.096479	-0.452639	-0.00274186	0.0568991	0.269454	0.215073	0.0020594	0.174598	0.257332	-0.22909
PC.36.2	grey	Glycerophospholipids	Glycerophosphocholines	PC	0.301902	0.360828	0.4206	0.202649	-0.396805	-0.357428	-0.146451	0.493774	0.510152	0.0386037	0.22438	-0.332652	-0.312623	-0.398587	-0.169858	-0.0503023	0.182331	0.28559	0.0423673	0.0279992	0.180496	-0.743872
PC.36.3.Isomer.B	grey	Glycerophospholipids	Glycerophosphocholines	PC	0.131985	0.19593	0.0483034	0.157233	-0.278554	-0.243857	-0.064659	0.24829	0.230571	0.13618	0.12501	-0.0843245	-0.0573707	0.121384	-0.0670369	0.118203	-0.186809	-0.148217	-0.198843	0.0696558	0.146885	-0.263604
PC.36.4.Isomer.A	grey	Glycerophospholipids	Glycerophosphocholines	PC	0.108008	0.193699	0.0397164	-0.118668	-0.307419	-0.249628	-0.163949	0.401655	0.474874	0.150069	0.185694	-0.142566	-0.0812267	0.027103	-0.171141	-0.0823509	0.0287845	0.075236	0.0368343	0.233532	0.0556714	-0.477123
PC.36.5.Isomer.D	grey	Glycerophospholipids	Glycerophosphocholines	PC	0.349996	-0.0906381	-0.1179	-0.166923	-0.428082	-0.0720674	-0.148891	0.677135	0.660671	0.30551	0.0364654	-0.235145	-0.2189	0.0548447	-0.271183	-0.252756	-0.201707	0.0420079	0.0751319	-0.0573232	0.0589675	-0.52809
PC.37.3	grey	Glycerophospholipids	Glycerophosphocholines	PC	0.209005	0.0771349	0.100092	0.162686	-0.406682	-0.145617	-0.129937	0.372436	0.339105	0.0774361	0.0897489	-0.334952	-0.221552	-0.1081	0.014683	0.107008	-0.0530245	0.136181	-0.0425328	-0.103195	0.276166	-0.561467
PC.38.1	grey	Glycerophospholipids	Glycerophosphocholines	PC	0.0765624	0.217683	0.523754	0.237329	-0.00697793	-0.36772	-0.0963471	-0.0527038	0.0599444	-0.070938	0.344677	-0.119328	-0.220676	-0.519242	-0.0419566	0.0669461	0.465264	0.124939	-0.20951	0.0392951	0.135045	-0.374455
PC.38.2	grey	Glycerophospholipids	Glycerophosphocholines	PC	-0.0810305	0.0829953	-0.0201836	-0.017553	0.0869852	-0.130331	-0.0182	-0.136705	-0.0947123	0.0285721	0.0960667	-0.0694709	-0.17254	-0.102685	-0.0966543	0.102399	0.0369682	-0.0762223	-0.0102559	-0.0785722	-0.183326	0.194015
PC.38.3	grey	Glycerophospholipids	Glycerophosphocholines	PC	-0.0242851	0.111061	-0.00697934	0.11908	-0.0730576	-0.0161275	-0.13682	0.0344479	-0.0746329	-0.00763145	0.0132764	0.0712605	0.103468	0.173542	0.196284	0.322849	0.0309729	0.0132329	0.0521797	0.276428	0.0157312	0.030214
PC.38.5.Isomer.B	grey	Glycerophospholipids	Glycerophosphocholines	PC	0.293459	-0.107225	-0.00483044	-0.145918	-0.352743	-0.067939	-0.178654	0.763667	0.778637	0.357418	0.107533	-0.242029	-0.196301	-0.110191	-0.207536	-0.219762	-0.100551	0.171685	0.0638755	-0.0218068	0.122443	-0.602399
PC.38.6.Isomer.A	grey	Glycerophospholipids	Glycerophosphocholines	PC	0.223889	-0.0876216	-0.10562	-0.272931	-0.367268	-0.122105	-0.21683	0.803552	0.802818	0.37748	0.10382	-0.1676	-0.147738	0.098746	-0.263856	-0.235902	-0.111519	0.0710455	0.119231	0.0754543	-0.0256506	-0.551353
PC.40.1	grey	Glycerophospholipids	Glycerophosphocholines	PC	0.0319257	0.131163	0.321121	0.0806261	-0.0598646	-0.167621	-0.207585	-0.141264	-0.081527	-0.127895	0.241261	0.0750736	-0.00467222	-0.406729	0.0380703	0.10734	0.402085	0.100803	-0.181204	0.0967435	0.0831958	-0.073376
PC.40.4	grey	Glycerophospholipids	Glycerophosphocholines	PC	0.31544	0.0931013	0.296963	0.18286	-0.268239	-0.265277	-0.0165565	0.611535	0.671392	0.281254	0.177109	-0.311255	-0.253463	-0.172301	-0.243316	-0.0522822	-0.126223	0.0555311	-0.017773	-0.1875	0.181501	-0.709829
PC.40.5.Isomer.B	grey	Glycerophospholipids	Glycerophosphocholines	PC	0.158148	0.0305566	0.245745	0.135361	-0.200408	-0.261765	-0.197018	0.430457	0.524257	0.244416	0.193766	-0.216801	-0.0504359	-0.138374	-0.0432674	0.0269273	-0.0681228	0.205534	0.093541	-0.122832	0.119153	-0.433863
PC.40.6.Isomer.B	grey	Glycerophospholipids	Glycerophosphocholines	PC	0.43941	0.0525358	0.0105939	-0.13407	-0.231803	-0.148961	-0.13121	0.693746	0.655842	0.485623	0.113552	-0.285752	-0.404249	-0.0114697	-0.466944	-0.197505	-0.230908	-0.0509209	0.0596272	-0.211041	-0.21814	-0.430595
PC.40.7.Isomer.B	grey	Glycerophospholipids	Glycerophosphocholines	PC	0.311147	0.0861089	0.0321337	-0.115527	-0.162678	-0.164127	-0.161565	0.571922	0.559245	0.326049	0.0789896	-0.232469	-0.303738	-0.0393307	-0.372298	-0.0970655	-0.173847	-0.0680633	-0.00523712	0.000302465	-0.134096	-0.285156
PC.42.2	grey	Glycerophospholipids	Glycerophosphocholines	PC	0.365117	0.211299	0.421056	0.299446	-0.115662	-0.230481	-0.00702789	0.203236	0.0960079	-0.151161	0.0434464	-0.203785	-0.230924	-0.487404	-0.0538681	0.180154	0.0696201	0.0819334	-0.0372397	-0.215013	0.130116	-0.408275
PC.O.18.0_16.0	grey	Glycerophospholipids	Glycerophosphocholines	O-PC	-0.260082	0.0118193	0.0475998	0.0793808	0.381428	0.105506	-0.011315	-0.466147	-0.454713	-0.32934	-0.19807	0.389899	0.403393	0.0911437	0.436951	0.28262	0.309078	0.0536541	0.0273682	0.311226	-0.0566862	0.536053
PC.O.30.0	grey	Glycerophospholipids	Glycerophosphocholines	O-PC	-0.185118	-0.144561	0.0785251	0.0587355	-0.230141	-0.0545734	0.0139337	0.0214198	0.227696	-0.128551	0.0469747	-0.198403	0.0578057	-0.373743	0.250248	-0.0189608	0.235764	0.436491	0.155642	0.0706225	0.4914	-0.348241
PC.O.30.1	grey	Glycerophospholipids	Glycerophosphocholines	O-PC	-0.0225715	-0.198796	-0.0779463	-0.163721	-0.295703	0.0579479	-0.0620642	0.167148	0.360155	0.0332127	0.128171	-0.0717172	0.0476481	-0.261329	0.130717	-0.187298	0.162819	0.361943	0.181934	-0.0860219	0.196629	-0.282119
PC.O.31.7	grey	Glycerophospholipids	Glycerophosphocholines	O-PC	-0.0186247	0.156885	0.153936	0.103135	-0.0247837	-0.334628	-0.103621	-0.359585	-0.275119	0.0169961	0.380204	-0.158183	-0.0405914	-0.3776	0.173893	0.134407	0.293038	0.0735984	-0.218076	-0.229424	0.202845	-0.0237738
PC.O.32.0	grey	Glycerophospholipids	Glycerophosphocholines	O-PC	-0.0984705	0.154504	0.208598	0.166959	-0.14076	-0.29309	-0.116495	-0.00460856	0.114923	-0.0971076	0.188748	0.0100262	0.19074	-0.29181	0.35316	0.398561	0.468984	0.326043	0.16285	0.219329	0.289732	-0.290409
PC.O.32.1	grey	Glycerophospholipids	Glycerophosphocholines	O-PC	0.15036	0.14199	0.247768	0.0403228	-0.369776	-0.358892	-0.266765	0.256933	0.463402	0.188325	0.407505	-0.238966	-0.0819305	-0.39527	0.169867	0.125072	0.359625	0.368421	0.160538	-0.119885	0.106674	-0.555752
PC.O.33.0	grey	Glycerophospholipids	Glycerophosphocholines	O-PC	-0.26531	0.0550731	0.128306	0.285279	-0.137778	-0.148926	0.0326011	-0.187998	-0.0921799	-0.289913	0.0411016	-0.062392	0.173432	-0.352825	0.388269	0.29913	0.285989	0.390988	0.12201	0.160015	0.580059	-0.197407
PC.O.34.0	grey	Glycerophospholipids	Glycerophosphocholines	O-PC	-0.240145	0.00449223	0.195536	0.143486	-0.00908014	-0.265281	-0.107723	-0.214978	-0.0654008	-0.163893	0.129772	0.143873	0.215108	-0.25459	0.457467	0.258263	0.437583	0.254308	0.0728799	0.112275	0.119314	-0.0820667
PC.O.36.1	grey	Glycerophospholipids	Glycerophosphocholines	O-PC	-0.0253365	0.0955219	0.394765	0.29038	-0.0756296	-0.210908	0.0583649	0.162179	0.268846	-0.0434339	0.213602	-0.382448	-0.269853	-0.57966	0.0447988	0.0590904	0.183091	0.179318	-0.0873382	-0.191398	0.376725	-0.550223
PC.O.40.2.or.PC.40.2e	grey	Glycerophospholipids	Glycerophosphocholines	O-PC	0.0471095	0.131491	0.278548	0.229976	0.201847	-0.0540797	0.147311	-0.127847	-0.0963555	-0.0712777	0.0971111	-0.205533	-0.254615	-0.311014	-0.144398	0.0577052	-0.0487773	-0.311274	-0.367406	-0.148676	0.129167	-0.0220818
PC.O.42.2.or.PC.42.2e	grey	Glycerophospholipids	Glycerophosphocholines	O-PC	0.268954	0.44378	0.578423	0.578811	-0.00532677	-0.239201	0.27884	0.0586927	-0.046924	-0.35033	-0.0772722	-0.263095	-0.405272	-0.515196	-0.117735	0.0532766	0.0701046	0.0463965	-0.154416	-0.0143185	0.363402	-0.374081
PC.P.34.0.or.PC.O.34.1	grey	Glycerophospholipids	Glycerophosphocholines	O-PC	-0.0548084	0.0493429	0.0558211	0.0207739	-0.0136241	-0.232713	-0.0804617	-0.0745079	-0.0110386	-0.0902784	0.108164	-0.0254948	0.00459569	-0.28296	0.123679	0.0534959	0.319652	0.260058	0.07671	0.338353	0.145628	0.0144495
PC.P.34.1.or.PC.O.34.2	grey	Glycerophospholipids	Glycerophosphocholines	O-PC	0.176814	4.38178e-05	0.128779	-0.116158	-0.42159	-0.347009	-0.342514	0.477532	0.685513	0.247594	0.360636	-0.324301	-0.259401	-0.282943	-0.072083	0.00320274	0.257497	0.245156	0.123841	-0.162976	-0.0115705	-0.676517
PC.P.34.1.or.PC.O.34.2.Isomer.A	grey	Glycerophospholipids	Glycerophosphocholines	O-PC	0.106666	0.106893	0.161166	0.0589745	-0.160258	-0.174957	-0.139727	0.0353211	0.162903	0.0215279	0.229185	0.0479805	-0.0635721	-0.135516	0.0257807	0.165023	0.220838	0.078536	0.0928627	-0.0411395	-0.111177	-0.17607
PC.P.34.2.or.PC.O.34.3	grey	Glycerophospholipids	Glycerophosphocholines	O-PC	0.190915	0.00685542	0.0162406	-0.223395	-0.453587	-0.329052	-0.437025	0.469887	0.679653	0.373436	0.409289	-0.31686	-0.151228	-0.233429	0.00833673	-0.0101684	0.253506	0.305539	0.18809	-0.196021	-0.0576374	-0.64157
PC.P.36.1.or.PC.O.36.2.A	grey	Glycerophospholipids	Glycerophosphocholines	O-PC	0.116334	0.148457	0.343161	0.101484	-0.203501	-0.264059	-0.0975308	0.319199	0.431023	0.0779883	0.35394	-0.417062	-0.414431	-0.557028	-0.231256	-0.0359891	0.228299	0.162111	-0.055134	-0.113138	0.190768	-0.651201
PC.P.36.1.or.PC.O.36.2.B	grey	Glycerophospholipids	Glycerophosphocholines	O-PC	-0.0359394	0.0379525	0.176989	-0.0208008	-0.294828	-0.274303	-0.146192	0.160033	0.34782	0.109731	0.383009	-0.163798	-0.0441448	-0.337185	0.215481	0.0553545	0.396245	0.276202	0.0331969	-0.0807008	0.0645188	-0.493516
PC.P.36.2.or.PC.O.36.3	grey	Glycerophospholipids	Glycerophosphocholines	O-PC	0.259976	0.123476	0.236121	-0.0848886	-0.320171	-0.404743	-0.303047	0.410359	0.577434	0.30516	0.436248	-0.396252	-0.319291	-0.403768	-0.10891	-0.109214	0.294013	0.26838	0.0545956	-0.162604	-0.000786089	-0.706185
PC.P.40.5.or.PC.O.40.6	grey	Glycerophospholipids	Glycerophosphocholines	O-PC	0.276131	-0.072482	0.0237232	-0.22589	-0.112075	-0.149121	-0.249158	0.609859	0.652554	0.366579	0.139256	-0.20955	-0.246679	-0.109153	-0.325024	-0.203871	-0.103159	0.0476378	0.127722	-0.209688	-0.348021	-0.336316
PC.P.42.2.or.PC.O.42.3	grey	Glycerophospholipids	Glycerophosphocholines	O-PC	0.235882	0.409019	0.313491	0.203036	-0.0529578	-0.261922	-0.00707151	-0.0267435	-0.0839894	-0.0812554	0.155531	-0.387518	-0.548018	-0.469957	-0.192194	0.0743226	0.196632	0.0169264	-0.175536	-0.0685734	0.068931	-0.259892
PC.P.42.4.or.PC.O.42.5	grey	Glycerophospholipids	Glycerophosphocholines	O-PC	0.289575	0.0471945	0.161189	-0.0476115	-0.12739	-0.145985	-0.0852834	0.66291	0.759086	0.336104	0.0519539	-0.354685	-0.25803	-0.155895	-0.240071	-0.173032	-0.125779	0.0833992	0.122703	-0.176191	-0.219107	-0.473315
PC.P.42.5.or.PC.O.42.6.Isomer.A	grey	Glycerophospholipids	Glycerophosphocholines	O-PC	0.180289	0.28972	0.382321	0.0640121	0.306628	-0.231322	-0.10951	0.428344	0.416237	0.273959	0.109247	-0.4308	-0.358153	-0.28853	-0.168012	0.104537	0.0129394	-0.0435892	0.0146665	-0.109204	-0.201714	-0.25732
PC.P.44.4.or.PC.O.44.5	grey	Glycerophospholipids	Glycerophosphocholines	O-PC	0.198801	-0.103383	0.0387765	-0.135665	-0.121187	-0.115207	-0.141868	0.534789	0.62401	0.317175	0.143391	-0.310605	-0.358577	-0.0509358	-0.380471	-0.223652	-0.150482	-0.131071	-0.149922	-0.174865	-0.135745	-0.455084
PE.38.6.Isomer.B	grey	Glycerophospholipids	Glycerophosphoethanolamines	PE	-0.045148	-0.217489	-0.248044	-0.233575	0.103538	0.211778	-0.115241	-0.111109	-0.210363	0.396361	0.197302	0.0613573	0.0484266	-0.0134219	0.11947	0.121355	-0.00499134	0.0462179	0.0391071	-0.086245	-0.145713	0.329605
PE.O.16.1_18.2	grey	Glycerophospholipids	Glycerophosphoethanolamines	O-PE	-0.235556	-0.116292	-0.0505383	-0.363452	0.02952	-0.166795	-0.481875	-0.104755	0.00910667	0.466671	0.528699	-0.103871	0.175003	0.0262575	0.243723	0.186243	0.287509	0.0641925	0.131611	-0.0513465	-0.353183	0.0569698
PE.O.18.1_16.0	grey	Glycerophospholipids	Glycerophosphoethanolamines	O-PE	-0.433038	-0.274742	-0.249248	-0.308399	0.220151	-0.0174822	-0.176597	-0.352619	-0.285726	0.0777586	0.0390244	0.333268	0.383761	0.351154	0.441377	0.016831	0.292662	0.0921762	0.304074	0.185683	-0.403262	0.506727
PE.O.18.1_22.6	grey	Glycerophospholipids	Glycerophosphoethanolamines	O-PE	-0.0348459	-0.0518084	-0.201754	-0.248652	0.11502	0.114295	-0.0880781	0.044949	-0.0295901	0.446176	0.30428	-0.126899	-0.131525	-0.0301578	-0.131033	0.00253848	-0.00149768	-0.0802834	-0.0100622	-0.194029	-0.258138	0.24077
PE.O.38.6.Isomer.A	grey	Glycerophospholipids	Glycerophosphoethanolamines	O-PE	-0.0879092	-0.190319	-0.149618	-0.298733	-0.0720418	-0.0298809	-0.220865	0.220593	0.218558	0.625341	0.501359	-0.348407	-0.198165	-0.101676	-0.0964933	-0.0135192	0.00263668	-0.0342708	0.0686658	-0.124349	-0.155345	-0.078377
PE.O.40.4	grey	Glycerophospholipids	Glycerophosphoethanolamines	O-PE	-0.187504	-0.131933	-0.226958	-0.281676	-0.0578653	-0.11043	-0.413783	0.0427258	0.151887	0.573586	0.571897	-0.185778	0.0550168	-0.073985	0.232444	0.223705	0.302569	0.291009	0.407423	-0.1581	-0.286902	0.015934
PE.P.38.4.or.PE.O.38.5	grey	Glycerophospholipids	Glycerophosphoethanolamines	O-PE	-0.049478	-0.279438	-0.220364	-0.422083	-0.244542	-0.142752	-0.436472	0.316058	0.430279	0.739834	0.585535	-0.193899	0.0375337	-0.000891717	0.0833332	0.0868471	0.0564343	0.106466	0.179376	-0.313775	-0.221897	-0.202732
PEtOH.16.0_16.0	grey	Glycerophospholipids	Glycerophosphatidylethanol	PEth	-0.419444	-0.249638	-0.247096	-0.217252	0.232683	0.115899	-0.0977006	-0.299742	-0.32307	-0.0971519	-0.283464	0.607923	0.610436	0.626773	0.375367	0.276609	0.141609	-0.0600007	0.207225	0.539956	-0.166028	0.61514
PEtOH.16.0_16.1	grey	Glycerophospholipids	Glycerophosphatidylethanol	PEth	-0.348062	-0.132722	-0.211724	-0.0897423	-0.0267367	-0.0173676	-0.126338	-0.382276	-0.3314	-0.10381	-0.157158	0.519347	0.602351	0.494347	0.424229	0.32852	0.307197	0.109009	0.166969	0.38363	0.00923671	0.474674
PEtOH.16.0_20.4	grey	Glycerophospholipids	Glycerophosphatidylethanol	PEth	-0.380039	-0.140192	-0.0369728	0.000425535	0.453258	0.186889	0.174259	-0.39313	-0.493778	-0.0758891	-0.123833	0.379829	0.358807	0.254515	0.306187	0.229218	0.0557777	-0.256435	-0.202387	0.364363	-0.093964	0.561896
PFAP.FT_diPAP	grey	PFAS_related	Perfluoroalkyl_Phosphate_Acid_derivative	PFAP	-0.307318	-0.292393	-0.307568	-0.255457	0.00308643	0.257725	-0.0301562	0.157629	0.0771663	0.000561943	-0.238999	0.235722	0.210211	0.467688	0.0438348	-0.0232314	-0.150141	-0.0197736	0.315242	0.290973	-0.0851244	0.163923
PGE2	grey	Fatty Acyls	Eicosanoids	Prostaglandins	-0.407762	-0.130916	-0.279481	-0.0423225	0.10968	0.127301	0.0229803	-0.631315	-0.579693	-0.246612	-0.181006	0.613161	0.585341	0.533944	0.457707	0.232741	0.0672348	-0.0901509	0.0174289	0.331458	-0.140958	0.714257
PI.16.0_16.0	grey	Glycerophospholipids	Glycerophosphoinositols	PI	-0.0640216	0.00936298	-0.0255574	0.163421	-0.249943	0.0623566	-0.029898	-0.211568	-0.28479	-0.2941	-0.133506	-0.0420845	0.0299205	-0.286524	0.22489	0.11915	0.191918	0.461414	0.11329	0.152412	0.538895	-0.000822279
PI.32.1	grey	Glycerophospholipids	Glycerophosphoinositols	PI	-0.0136099	0.371864	0.204211	0.274056	0.0478358	-0.0311503	0.118457	-0.346421	-0.435142	-0.475453	-0.247928	0.123409	0.0664223	-0.254867	0.262249	0.117125	0.243873	0.331795	0.103792	0.205831	0.192165	0.204024
PI.34.1.Isomer.A	grey	Glycerophospholipids	Glycerophosphoinositols	PI	-0.0455052	-0.120869	-0.0992086	-0.0704582	-0.229644	-0.0763167	-0.222259	0.234385	0.217138	0.130662	0.0438551	-0.218305	0.0826596	0.0405422	0.0826302	0.0574231	0.145503	0.27843	0.325934	0.0202098	0.0539486	-0.0783794
PI.34.2	grey	Glycerophospholipids	Glycerophosphoinositols	PI	0.155894	0.37132	0.0878282	0.175427	0.0286055	-0.181816	-0.00424622	0.200715	-0.020278	-0.0774341	-0.100922	-0.163619	-0.297876	-0.225397	-0.150721	0.0222973	0.206548	0.237829	0.229357	0.106298	-0.0177574	-0.0211599
PI.34.2.Isomer.B	grey	Glycerophospholipids	Glycerophosphoinositols	PI	0.0302545	0.341294	-0.0320927	0.109752	0.0752814	-0.0360189	-0.12361	0.0162742	-0.188279	-0.0214471	-0.00715774	-0.0104261	0.0739354	-0.139674	0.185835	0.301988	0.303642	0.298211	0.321563	0.167382	-0.0160672	0.148332
PI.36.1.Isomer.A	grey	Glycerophospholipids	Glycerophosphoinositols	PI	0.0475203	0.111486	0.289771	0.269239	0.0194184	-0.139864	0.0318269	-0.115324	-0.176932	-0.335681	0.00190287	-0.1304	-0.117362	-0.497938	0.0849225	0.184952	0.290342	0.186934	-0.0183355	-0.0104575	0.257531	-0.101851
PI.38.3	grey	Glycerophospholipids	Glycerophosphoinositols	PI	0.167472	0.221632	0.0720284	0.151648	-0.233417	-0.0138268	-0.0432274	0.133205	0.0228861	-0.129225	0.00067288	-0.247256	-0.226684	-0.200644	-0.172821	-0.081261	-0.0808947	0.00750966	-0.154124	0.218765	0.166083	-0.227525
PMeOH.16.0_18.1	grey	Glycerophospholipids	Glycerophosphoinositols	PMeOH	-0.0238937	0.25856	0.241406	0.250638	0.0651514	-0.250299	-0.053115	-0.475322	-0.477376	-0.139375	0.224926	0.10207	0.0654107	-0.273902	0.154986	0.350118	0.358711	0.160286	-0.0271469	-0.183351	0.107891	0.199811
PS.16.0_22.4	grey	Glycerophospholipids	Glycerophosphoserines	PS	0.0515182	-0.164381	-0.156787	-0.343704	0.046139	0.0294202	-0.180892	0.571895	0.515507	0.594353	0.209998	-0.244274	-0.125314	0.188496	-0.0971114	-0.0123812	-0.129592	-0.149858	0.20217	-0.032108	-0.36135	-0.241466
PS.18.0_22.6	grey	Glycerophospholipids	Glycerophosphoserines	PS	0.134938	-0.121653	-0.228308	-0.344163	0.0214884	0.0770655	-0.145314	0.34107	0.243171	0.433365	0.0595136	-0.231426	-0.160366	0.171107	-0.215438	-0.0932698	-0.113721	-0.0133697	0.259257	-0.0546113	-0.368031	0.0377769
PS.36.1	grey	Glycerophospholipids	Glycerophosphoserines	PS	-0.246472	-0.228991	-0.225331	-0.318348	-0.0669823	-0.240439	-0.404047	-0.107859	0.0371742	0.315659	0.412689	-0.0159752	0.236864	0.174932	0.307054	0.304783	0.387497	0.0352137	0.195726	-0.0394138	-0.26155	-0.0785346
PS.36.2	grey	Glycerophospholipids	Glycerophosphoserines	PS	-0.142786	-0.140663	-0.194537	-0.343977	0.153068	0.0362474	-0.253876	-0.211473	-0.145562	0.234088	0.307955	0.238262	0.151077	0.0773405	0.0849902	0.0949616	0.199085	-0.156253	-0.0714894	-0.150138	-0.427479	0.199117
PS.38.3	grey	Glycerophospholipids	Glycerophosphoserines	PS	-0.273769	-0.156778	-0.249406	-0.370233	-0.0425061	-0.240286	-0.512768	-0.0267133	0.0767795	0.403476	0.478502	-0.0885678	0.207242	0.285179	0.0886977	0.281997	0.131101	-0.112035	0.0978552	0.0163085	-0.338861	0.0502637
PS.40.4	grey	Glycerophospholipids	Glycerophosphoserines	PS	-0.0925767	-0.213029	-0.307969	-0.440307	0.105647	-0.0121596	-0.212934	0.157441	0.121012	0.47838	0.183498	-0.0149992	0.0431763	0.312205	0.137849	0.146054	0.0829697	-0.10566	0.220781	-0.122625	-0.511391	0.0406323
SHexCer.34.1.3O	grey	Sphingolipids	Glycosphingolipids	SHexCer	-0.0891589	-0.107094	-0.203872	-0.367058	0.190467	0.168064	-0.138541	-0.0232579	-0.00828467	0.0562603	-0.0126005	0.000452912	-0.10952	-0.0330332	0.0117076	-0.242848	0.135842	0.220156	0.186528	-0.0169632	-0.280864	0.246165
SHexCer.d34.1	grey	Sphingolipids	Glycosphingolipids	SHexCer	-0.137862	-0.0746044	-0.026917	-0.202594	0.180586	0.320047	-0.0615235	0.0357568	0.149323	0.0228738	0.0999098	-0.0269182	0.00241426	-0.0969381	-0.206028	-0.224205	-0.137116	0.0260765	0.0733307	0.0819883	-0.0820746	0.0953422
SM.12.1.2O.32.8	grey	Sphingolipids	Phosphosphingolipids	SM	0.404956	0.221683	0.356525	0.203863	-0.25977	-0.167974	-0.0583889	0.714437	0.61755	0.0484304	-0.0219821	-0.171095	-0.257536	-0.371785	-0.126475	-0.0438715	0.177929	0.420578	0.297784	-0.0624547	0.0636581	-0.592967
SM.16.1.2O.16.0	grey	Sphingolipids	Phosphosphingolipids	SM	-0.328629	-0.286756	-0.14515	-0.211626	-0.0251003	0.109875	-0.229931	-0.215496	-0.0843264	0.010781	0.123472	0.146418	0.42327	0.0866396	0.254142	0.113519	0.338764	0.193822	0.226075	0.0447235	-0.0216379	0.244414
SM.20.0.2O.22.3	grey	Sphingolipids	Phosphosphingolipids	SM	-0.156266	0.0606988	-0.131866	-0.0309834	0.0399522	-0.00511556	-0.118239	-0.304287	-0.333931	-0.0857434	0.0163072	0.287869	0.353512	0.0447669	0.369629	0.40986	0.281452	0.319181	0.317614	0.120862	-0.0687848	0.408168
SM.22.1.2O.12.0	grey	Sphingolipids	Phosphosphingolipids	SM	-0.24769	0.0363421	0.0420012	-0.0930417	0.255967	0.0298055	-0.116446	-0.21871	-0.265701	-0.127786	-0.0334686	0.319969	0.279648	0.0766261	0.233609	0.121866	0.328439	0.102468	0.220282	0.314044	-0.238641	0.381974
SM.25.2.2O.15.1	grey	Sphingolipids	Phosphosphingolipids	SM	0.164476	0.0985381	0.023377	-0.0351782	-0.297792	-0.335425	-0.41617	0.317152	0.273162	0.180033	0.110659	-0.231118	0.0806791	-0.0955674	0.250173	0.381843	0.256667	0.495601	0.596744	-0.0911151	-0.0650095	-0.263491
SM.26.0.2O.18.1	grey	Sphingolipids	Phosphosphingolipids	SM	-0.141908	0.0444784	-0.0545474	0.0537944	0.10667	-0.270226	-0.0815941	-0.392357	-0.450133	-0.247403	-0.169567	0.473063	0.481508	0.136987	0.433656	0.368245	0.459912	0.167487	0.194307	0.18893	0.0140001	0.439168
SM.30.2.2O..FA.14.0.	grey	Sphingolipids	Phosphosphingolipids	SM	0.276048	0.403795	0.24252	0.164234	0.01458	-0.247625	-0.144846	-0.0096826	0.0278539	0.05913	0.229468	-0.438768	-0.509319	-0.432172	-0.23347	0.0727986	0.0686665	-0.0598182	-0.224587	-0.237214	0.00226336	-0.152891
SM.32.0.3O	grey	Sphingolipids	Phosphosphingolipids	SM	-0.259562	-0.164003	-0.0805766	0.0355374	-0.166728	0.00485542	-0.131441	-0.257563	-0.0794215	-0.0628556	0.121535	0.0262066	0.309503	-0.166958	0.482579	0.227386	0.399327	0.414801	0.148738	0.038786	0.416133	0.0185171
SM.34.0.3O	grey	Sphingolipids	Phosphosphingolipids	SM	-0.356043	-0.257891	-0.151067	-0.432451	-0.0315014	-0.0748606	-0.526949	-0.166829	-0.0315526	0.0782093	0.319734	0.267741	0.390306	0.152525	0.276184	0.167353	0.572053	0.191725	0.222164	0.246582	-0.25175	0.171565
SM.34.2.3O	grey	Sphingolipids	Phosphosphingolipids	SM	0.0330401	0.254208	0.175492	0.199172	0.04387	-0.275596	-0.192657	-0.317841	-0.324783	-0.232305	0.000331074	0.0838556	0.275686	-0.326947	0.574567	0.464485	0.583192	0.479672	0.310721	0.135962	0.142801	0.114536
SM.35.1.2O	grey	Sphingolipids	Phosphosphingolipids	SM	0.0334816	-0.192482	-0.266086	-0.276518	-0.185426	-0.0502085	-0.259361	0.0970912	0.0833552	0.117786	0.0518845	0.0503351	0.205027	0.139987	0.317642	0.0708495	0.202378	0.366008	0.50524	-0.00425708	-0.189796	-0.0241206
SM.42.0.3O	grey	Sphingolipids	Phosphosphingolipids	SM	-0.292744	-0.0143431	0.033018	-0.0514435	0.326904	-0.0476587	-0.209472	-0.413385	-0.202222	-0.117724	0.114322	0.100507	0.309636	-0.0992995	0.394367	0.302601	0.444076	0.117009	-0.0264362	0.236666	0.00187121	0.333491
SM.42.2.3O	grey	Sphingolipids	Phosphosphingolipids	SM	0.188583	0.306609	0.301571	0.411853	-0.0371312	-0.0865947	0.0490195	-0.290693	-0.342995	-0.335835	-0.164135	0.0636341	0.165441	-0.332404	0.372297	0.266306	0.400909	0.383511	0.192	-0.0194956	0.283256	0.062915
SM.42.7.3O	grey	Sphingolipids	Phosphosphingolipids	SM	0.17129	0.433942	0.418668	0.422805	-0.03793	-0.269261	0.0689513	-0.24672	-0.278514	-0.2546	0.138033	-0.055306	-0.146932	-0.628714	0.1028	0.198923	0.363023	0.384487	0.00756533	-0.0218188	0.29104	-0.114674
SM.46.5.3O	grey	Sphingolipids	Phosphosphingolipids	SM	0.282803	0.142633	0.281509	0.137575	-0.124272	-0.135484	0.043133	0.395648	0.493766	0.171234	0.13286	-0.389211	-0.399964	-0.245667	-0.25602	-0.153606	-0.1215	0.0317293	-0.00719369	-0.163456	-0.101552	-0.442483
SM.d30.1	grey	Sphingolipids	Phosphosphingolipids	SM	0.00942586	0.0264086	0.115938	0.13851	-0.355148	-0.0585232	-0.055789	-0.0268672	0.0447922	-0.243338	-0.0442061	-0.163755	-0.0197218	-0.372449	0.0796289	-0.0756717	0.188734	0.453127	0.103336	0.0768245	0.538563	-0.26427
SM.d31.1	grey	Sphingolipids	Phosphosphingolipids	SM	-0.0555999	0.0165548	-0.0620126	0.0847682	-0.236635	0.084565	-0.0297713	-0.115748	-0.119629	-0.250789	-0.0681409	-0.0553201	0.0841268	-0.334477	0.246096	-0.0396894	0.27522	0.626861	0.28814	-0.0082484	0.43362	-0.0805169
SM.d32.1	grey	Sphingolipids	Phosphosphingolipids	SM	-0.125326	-0.221012	-0.0485215	0.000338967	-0.229282	0.109557	-0.00268875	-0.0409296	0.000605101	-0.22232	-0.170226	0.00600724	0.272997	-0.142014	0.343244	-0.0118715	0.161161	0.524175	0.383549	0.0418447	0.335914	-0.0424281
SM.d32.2	grey	Sphingolipids	Phosphosphingolipids	SM	0.0704256	0.105533	0.20234	0.238932	-0.375957	-0.144567	-0.0294179	0.0743743	0.0820857	-0.102404	0.113558	-0.151157	-0.0197067	-0.406261	0.0613374	0.126352	0.211378	0.469773	0.156161	-0.0409727	0.495903	-0.372915
SM.d34.0	grey	Sphingolipids	Phosphosphingolipids	SM	-0.22254	-0.0385216	-0.029707	-0.121866	-0.117169	-0.204261	-0.345395	-0.294707	-0.177507	-0.0594288	0.158061	0.408653	0.477338	0.131019	0.432515	0.446236	0.613082	0.24155	0.264739	0.288928	-0.105322	0.263531
SM.d34.1	grey	Sphingolipids	Phosphosphingolipids	SM	-0.288402	-0.0658208	-0.0228756	-0.191856	0.0467142	-0.176995	-0.383101	-0.241095	-0.181152	-0.0892375	0.0940437	0.303327	0.446356	0.0524033	0.479388	0.336092	0.580987	0.35823	0.411094	0.323034	-0.250508	0.312434
SM.d36.0.Isomer.B	grey	Sphingolipids	Phosphosphingolipids	SM	0.0981104	0.142096	-0.0229319	0.147483	-0.221977	-0.0950941	-0.113504	-0.0321719	-0.106195	-0.107905	-0.191439	0.0872292	0.203253	0.178997	0.310338	0.328308	0.192656	0.262058	0.404878	0.115553	-0.0330552	0.143333
SM.d38.0.Isomer.B	grey	Sphingolipids	Phosphosphingolipids	SM	0.193355	0.256704	0.0758465	0.272952	-0.273247	-0.147087	-0.0564777	-0.239847	-0.223106	-0.269673	-0.169814	0.134253	0.190278	0.0121017	0.364258	0.297777	0.298808	0.365212	0.246733	0.103327	0.191644	0.130108
SM.d38.3	grey	Sphingolipids	Phosphosphingolipids	SM	0.127902	0.147832	0.0215922	0.159125	-0.252643	-0.118921	-0.229274	0.114288	0.0742336	0.0128959	0.0238786	-0.171608	0.123744	-0.113864	0.291662	0.34803	0.0255581	0.379421	0.421643	-0.0032244	0.114866	-0.0723116
SM.d40.0.Isomer.B	grey	Sphingolipids	Phosphosphingolipids	SM	0.00387132	0.0611188	0.00789789	0.117853	-0.179999	-0.196598	-0.18098	-0.3053	-0.307606	-0.259384	-0.103516	0.318807	0.325667	0.0762464	0.428891	0.380522	0.543396	0.318165	0.150573	0.223436	0.203951	0.205097
SM.d40.1.Isomer.B	grey	Sphingolipids	Phosphosphingolipids	SM	-0.205722	-0.163735	-0.0700942	-0.0831551	-0.051397	-0.153163	-0.315884	-0.263943	-0.212713	-0.141864	0.0632145	0.282289	0.440341	-0.00843202	0.61505	0.375388	0.561605	0.38839	0.264903	0.193864	-0.000387714	0.25303
SM.d40.4	grey	Sphingolipids	Phosphosphingolipids	SM	0.0367172	0.0340083	0.0161299	0.0121397	-0.259176	-0.0847201	-0.177537	-0.0522025	-0.0721846	-0.219356	-0.0684047	0.21808	0.271379	-0.129134	0.423774	0.170731	0.525325	0.717962	0.586952	0.199428	-0.0382978	0.0835327
SM.d41.2.Isomer.A	grey	Sphingolipids	Phosphosphingolipids	SM	-0.285962	-0.325239	-0.169069	-0.0996606	0.0481888	0.173931	-0.0738998	-0.0915473	-0.107684	0.0089345	0.0498548	0.11937	0.267413	-0.120198	0.355416	0.112271	0.171132	0.364076	0.384297	-0.0232609	-0.0922407	0.228359
SM.d42.2.Isomer.B	grey	Sphingolipids	Phosphosphingolipids	SM	-0.0531613	0.113219	0.157259	0.0848866	-0.0659564	-0.382508	-0.292199	-0.292871	-0.34458	-0.0840096	0.227196	0.152759	0.251571	-0.0935253	0.318703	0.585273	0.565334	0.157517	0.0548683	0.16566	-0.00083399	0.204701
SM.d43.1	grey	Sphingolipids	Phosphosphingolipids	SM	-0.151624	0.0654766	0.0259347	-0.00406963	-0.10263	-0.137995	-0.166087	-0.109644	-0.031207	-0.0449505	0.175742	0.043075	0.21592	-0.165291	0.333441	0.271423	0.470621	0.549159	0.383761	0.0942748	0.101955	-0.00925841
SM.d44.2	grey	Sphingolipids	Phosphosphingolipids	SM	-0.216625	0.00287646	-0.0337349	-0.100743	0.392278	-0.0179513	-0.105279	-0.401103	-0.486228	-0.16127	-0.00925969	0.272932	0.283667	0.0709054	0.155953	0.19843	0.290631	-0.175715	-0.0683102	0.288353	-0.162544	0.467564
SM.d44.3	grey	Sphingolipids	Phosphosphingolipids	SM	-0.045383	0.224729	0.0857864	0.0674487	0.206524	-0.205183	-0.0831926	-0.266267	-0.345846	0.00655591	0.115769	0.11496	0.180351	-0.0417892	0.205701	0.440696	0.401261	0.0797424	0.129158	0.243931	-0.167021	0.323052
SPB.25.0.2O	grey	Sphingolipids	Sphingoid bases	SPB	-0.238706	-0.139457	-0.0327604	-0.0696728	0.369062	0.0834997	0.096631	-0.142491	-0.0373993	0.132803	0.0863899	0.0507065	-0.148841	-0.0171528	-0.158737	-0.0684735	-0.144805	-0.225697	-0.200544	-0.0584505	-0.164116	0.171276
SPB.26.0.2O	grey	Sphingolipids	Sphingoid bases	Sphinganines	-0.23304	-0.240281	-0.242755	-0.383332	0.400142	-0.0779122	-0.180192	-0.0319802	0.033256	0.285171	0.112321	0.176694	0.00577859	0.297182	-0.165949	-0.0668963	-0.0551164	-0.381252	-0.118026	-0.0118139	-0.526137	0.316311
TG.10.0_12.0_18.2	grey	Glycerolipids	Triradylglycerols	TAG	0.150693	0.466681	0.319276	0.415289	-0.132631	-0.251889	-0.0175569	-0.1097	-0.247086	-0.336152	-0.0932616	-0.00823672	-0.137861	-0.425946	0.089961	0.22805	0.396399	0.557093	0.269694	0.0453531	0.180292	-0.0124178
TG.14.0_16.0_17.1	grey	Glycerolipids	Triradylglycerols	TAG	-0.107033	-0.0749841	-0.248743	0.0506066	0.337829	0.605069	0.501301	0.0374163	-0.10369	-0.22406	-0.463301	0.219157	-0.0402278	0.0391064	-0.190338	-0.274562	-0.322192	-0.0569286	-0.0183298	0.0106996	0.130083	0.31445
TG.28.0	grey	Glycerolipids	Triradylglycerols	TAG	-0.216318	-0.229281	-0.0805226	-0.101591	0.266967	0.323299	0.0733185	-0.210538	-0.218662	0.0670048	0.0140177	0.112193	0.108057	0.152219	0.00396768	-0.0885928	-0.268939	-0.257374	-0.0826603	-0.0766259	-0.299189	0.427579
TG.40.1	grey	Glycerolipids	Triradylglycerols	TAG	-0.221977	-0.0240509	0.0700864	0.35347	-0.0431133	0.0458382	0.31534	-0.490894	-0.502745	-0.521284	-0.312366	0.533197	0.406687	0.138842	0.305593	0.0866699	0.0845588	0.142244	-0.0271743	0.355047	0.37417	0.36143
TG.42.0	grey	Glycerolipids	Triradylglycerols	TAG	0.191591	0.222585	0.220529	0.415017	0.197576	0.480739	0.727147	-0.21281	-0.342957	-0.412834	-0.368401	0.122917	-0.143135	-0.330218	-0.186242	-0.381751	-0.251529	-0.0524106	-0.27132	-0.14681	0.224118	0.128442
TG.42.2	grey	Glycerolipids	Triradylglycerols	TAG	0.0167541	0.0483346	0.0294111	0.101579	0.17659	0.595337	0.508124	0.0363821	-0.134681	-0.247944	-0.30924	0.00512836	-0.0742436	-0.155189	-0.15108	-0.438313	-0.185736	0.0494863	0.0117521	0.0748727	0.0298637	0.0723854
TG.43.0	grey	Glycerolipids	Triradylglycerols	TAG	-0.187947	-0.108972	-0.200213	-0.0215079	0.272468	0.737156	0.558201	-0.0467638	-0.136483	-0.209496	-0.396808	0.250862	0.0309848	0.123525	-0.233721	-0.406456	-0.388779	-0.177669	-0.14227	0.0645055	0.0473396	0.364871
TG.44.1	grey	Glycerolipids	Triradylglycerols	TAG	0.322216	0.395102	0.33997	0.550245	0.0948902	0.08148	0.527904	-0.244773	-0.356395	-0.372625	-0.195671	0.0252047	-0.177467	-0.524005	-0.135736	-0.165064	-0.054726	0.0729146	-0.267452	-0.223501	0.391567	0.0404123
TG.44.2	grey	Glycerolipids	Triradylglycerols	TAG	0.0302276	-0.0207646	-0.00581344	0.0940466	0.339582	0.678648	0.649284	-0.115528	-0.297721	-0.23234	-0.401063	0.179514	-0.1214	0.0940977	-0.254081	-0.523206	-0.426106	-0.325783	-0.372958	0.0646805	-0.0413021	0.275284
TG.45.0	grey	Glycerolipids	Triradylglycerols	TAG	-0.0138452	0.139517	-0.040718	0.222312	0.352335	0.455495	0.546177	-0.143508	-0.323665	-0.362822	-0.485698	0.256502	-0.0939499	-0.0426713	-0.149832	-0.205303	-0.273088	-0.0858775	-0.215784	0.13013	0.131302	0.401713
TG.45.1	grey	Glycerolipids	Triradylglycerols	TAG	0.0266275	0.171742	-0.0686356	0.223788	0.25017	0.322825	0.397798	-0.273301	-0.347145	-0.255198	-0.205924	0.056316	-0.12873	-0.333085	-0.192934	-0.113392	-0.141566	-0.0380118	-0.174504	-0.280257	0.274564	0.273288
TG.46.2	grey	Glycerolipids	Triradylglycerols	TAG	0.00608195	0.0968275	-0.0257773	0.126825	0.345611	0.556155	0.505439	-0.0569183	-0.205111	-0.244578	-0.36947	0.146835	-0.0651344	-0.00520606	-0.351131	-0.38224	-0.411893	-0.208125	-0.108931	-0.0143701	-0.113518	0.305723
TG.47.2	grey	Glycerolipids	Triradylglycerols	TAG	-0.25968	-0.0609398	-0.291039	-0.108972	0.367826	0.427505	0.198921	-0.19756	-0.293963	-0.107295	-0.198492	0.276926	0.153951	0.237262	-0.140251	-0.16249	-0.101854	-0.237576	-0.0746425	0.0836559	-0.133976	0.539339
TG.47.3.Isomer.B	grey	Glycerolipids	Triradylglycerols	TAG	-0.343642	-0.0671398	-0.288244	-0.211606	0.499056	0.355092	0.0309482	-0.182626	-0.248435	-0.101855	-0.209587	0.266117	0.0944092	0.254533	-0.112833	-0.0857071	-0.0455182	-0.148475	0.0134735	0.28092	-0.220752	0.617087
TG.49.3	grey	Glycerolipids	Triradylglycerols	TAG	0.00795123	0.184107	-0.0569695	0.307837	0.0565061	0.22157	0.434802	-0.163594	-0.307334	-0.380831	-0.409499	0.318283	0.0463728	0.11289	-0.123644	-0.220435	-0.129617	0.0291897	0.0201629	0.23777	0.145254	0.346597
TG.52.4.O2.TG.16.0_18.1_18.3.O2	grey	Glycerolipids	Triradylglycerols	TAG	0.176702	0.511815	0.298093	0.509595	-0.136433	-0.494384	-0.0328087	-0.445433	-0.452092	-0.292613	0.0164157	0.161887	0.110296	-0.0882874	0.271934	0.519362	0.322271	0.135432	-0.0122289	0.0152652	0.156254	0.144975
TG.54.0	grey	Glycerolipids	Triradylglycerols	TAG	-0.103927	-0.201592	-0.107289	-0.189256	0.449617	0.67532	0.353106	0.15318	0.0357578	-0.174471	-0.4691	0.168118	-0.0260338	0.183996	-0.227442	-0.381681	-0.361339	-0.332037	-0.130102	0.0956437	-0.238225	0.289784
TG.55.3	grey	Glycerolipids	Triradylglycerols	TAG	0.162623	0.428986	0.587638	0.557278	0.440299	0.183307	0.515098	-0.0489987	-0.153538	-0.419395	-0.430445	0.0016627	-0.258718	-0.243142	-0.250124	-0.239862	-0.165172	-0.118388	-0.166158	0.0574887	-0.00863765	0.0364912
TG.55.4	grey	Glycerolipids	Triradylglycerols	TAG	0.104548	0.525654	0.356295	0.324	0.407093	0.0246468	0.213353	-0.112724	-0.189176	-0.115698	-0.117278	0.0175145	-0.139376	-0.114717	-0.123928	0.0227825	-0.00351129	-0.144678	-0.102848	0.0540239	-0.116641	0.141115
TG.58.4	grey	Glycerolipids	Triradylglycerols	TAG	-0.193219	0.150342	-0.0587881	0.136383	0.389374	0.236457	0.363998	-0.373473	-0.561066	-0.135814	-0.0308181	0.115126	0.00124116	-0.0685537	-0.102402	0.0523381	-0.0887619	-0.26199	-0.180488	0.0301531	0.0144868	0.423177
TG.64.3	grey	Glycerolipids	Triradylglycerols	TAG	-0.327339	0.0469881	-0.256771	-0.0788814	0.338723	0.157195	-0.028827	-0.323035	-0.418641	-0.0402477	-0.111203	0.214366	0.179856	0.294004	0.0168025	0.122326	-0.0599452	-0.209537	0.0709633	0.157218	-0.167981	0.526848
trihydroxyoctadec.15.enoic.acid	grey	Fatty Acyls	Octadecanoids	Tri-HODE	-0.19101	0.156635	0.104145	0.128441	0.13313	-0.176957	-0.129475	-0.63599	-0.528145	-0.196821	0.105981	0.270089	0.301999	0.0126562	0.316701	0.355186	0.331477	0.130757	0.0579625	0.0990348	-0.0215678	0.500517
X1.2.Dioleoyl.sn.glycero.3.phospho..1..myo.inositol.	grey	Glycerophospholipids	Glycerophosphoinositols	PI	0.217188	0.456652	0.192802	0.0878813	0.0708978	-0.0844653	-0.12847	0.359812	0.160555	0.0268804	-0.0125173	-0.25489	-0.3045	-0.310504	-0.127594	0.0681925	0.274216	0.316937	0.257206	0.102611	-0.23802	-0.165839
X16.16.dimethylprostaglandin.A1	grey	Fatty Acyls	Eicosanoids	Prostaglandins	0.00917019	0.0465754	-0.00764428	0.0127221	0.0449533	0.0911398	0.0974992	-0.278449	-0.341211	-0.197573	-0.121451	0.0929163	0.00530511	0.0566402	0.0508866	0.0012295	-0.018045	0.125343	0.134823	-0.0776467	-0.0161602	0.143838
X4.methyl.2.oxopentanoic.acid	grey	Organic acids	Keto acids	Short-chain keto acids	-0.0360046	-0.20586	-0.191531	-0.183919	0.0378617	0.306408	0.0300097	0.0819045	-0.0365156	0.0762944	-0.113712	0.0284571	0.0325411	0.118096	-0.0587255	-0.169964	-0.119233	0.0407306	0.23851	-0.0649562	-0.232651	0.155472
Cer.d32.1	grey60	Sphingolipids	Ceramides	Cer	-0.530778	-0.403999	-0.289626	-0.16033	-0.021855	0.108851	-0.0729471	-0.52332	-0.362438	-0.225464	-0.130558	0.646104	0.868938	0.465194	0.631944	0.37498	0.210463	0.124746	0.203157	0.276507	0.107095	0.532136
Cer.d33.1	grey60	Sphingolipids	Ceramides	Cer	-0.605181	-0.525751	-0.468637	-0.37791	0.113429	0.29432	-0.117341	-0.425612	-0.276693	-0.0735059	-0.117664	0.597669	0.858297	0.533213	0.465802	0.115696	-0.0109858	0.0508033	0.246261	0.268025	-0.133702	0.617794
Cer.d34.1	grey60	Sphingolipids	Ceramides	Cer	-0.593377	-0.329188	-0.189382	-0.166314	0.140606	-0.0320921	-0.225794	-0.478859	-0.342158	-0.0984271	-0.0396724	0.560079	0.870946	0.507462	0.680833	0.473284	0.286074	0.0598329	0.277792	0.400734	-0.068962	0.498069
Cer.d34.2	grey60	Sphingolipids	Ceramides	Cer	-0.52629	-0.411997	-0.283789	-0.225585	-0.0340906	0.107018	-0.192475	-0.359207	-0.191941	-0.0329692	-0.00511536	0.5575	0.935056	0.54014	0.670861	0.373603	0.131012	0.101086	0.268138	0.322983	-0.0579074	0.423429
Cer.d34.2.Isomer.B	grey60	Sphingolipids	Ceramides	Cer	-0.68305	-0.49559	-0.400551	-0.29675	0.101659	0.159563	-0.10143	-0.520718	-0.363258	-0.0880669	0.0190871	0.587735	0.899452	0.50748	0.615309	0.27166	0.0900269	0.0393866	0.290146	0.31271	-0.0343205	0.576459
PEtOH.16.1_16.1	grey60	Glycerophospholipids	Glycerophosphatidylethanol	PEth	-0.52904	-0.394347	-0.350037	-0.281614	-0.038595	0.0474451	-0.180692	-0.249153	-0.168135	-0.0578106	-0.0314292	0.552146	0.818951	0.6413	0.55388	0.38699	0.230556	-0.0241706	0.178466	0.47255	-0.0492848	0.343781
SM.d33.1	lightcyan	Sphingolipids	Phosphosphingolipids	SM	-0.178489	-0.176727	-0.180226	-0.114993	-0.346095	-0.140459	-0.2378	0.0538617	0.145231	0.0264843	0.0606874	-0.0140908	0.256846	-0.0152276	0.432383	0.117208	0.327572	0.705642	0.693371	-0.0338652	0.0822911	-0.159354
SM.d35.1	lightcyan	Sphingolipids	Phosphosphingolipids	SM	-0.141165	-0.219547	-0.328297	-0.308852	-0.340139	-0.110612	-0.411342	0.15339	0.224094	0.231684	0.135836	-0.0684226	0.18309	0.0726357	0.368091	0.110803	0.348517	0.685182	0.817287	0.00753347	-0.13073	-0.122887
SM.d35.2	lightcyan	Sphingolipids	Phosphosphingolipids	SM	-0.124453	-0.153407	-0.219639	-0.153597	-0.207335	0.0386113	-0.209181	0.226073	0.235617	0.159943	-0.0160729	-0.04618	0.179196	-0.0189818	0.326214	0.124334	0.194195	0.689779	0.809598	-0.10133	0.00372991	-0.128758
SM.d36.0.Isomer.A	lightcyan	Sphingolipids	Phosphosphingolipids	SM	-0.038301	0.0530686	-0.0404331	-0.0253494	-0.0841413	-0.128242	-0.242501	0.0634418	0.0370941	-0.0344633	-0.0929463	0.079529	0.343771	0.0574013	0.421083	0.338406	0.382483	0.586534	0.860033	0.174435	-0.176308	0.0865277
SM.d36.1	lightcyan	Sphingolipids	Phosphosphingolipids	SM	-0.0572048	0.0263961	-0.051089	-0.0583355	-0.0845347	-0.161528	-0.290418	0.0609789	0.0375356	-0.011389	-0.0498087	0.0602275	0.332928	0.0367703	0.451806	0.34449	0.42341	0.598796	0.866732	0.174588	-0.207338	0.0771162
SM.d36.2	lightcyan	Sphingolipids	Phosphosphingolipids	SM	0.00518189	0.0192809	-0.0557879	-0.0978168	-0.133641	-0.152684	-0.239855	0.371072	0.308688	0.184428	-0.00523208	-0.119689	0.0762932	0.00955081	0.179178	0.18872	0.184632	0.520251	0.85609	-0.0209542	-0.23801	-0.191606
SM.d38.2	lightcyan	Sphingolipids	Phosphosphingolipids	SM	0.0309983	0.107498	0.0165164	-0.0190291	-0.186914	-0.110459	-0.262766	0.192753	0.147412	-0.0135343	0.0962853	0.0365038	0.19736	-0.150736	0.271345	0.301753	0.346416	0.534882	0.670366	-0.0179661	-0.205876	-0.118829
TG.22.0	lightgreen	Glycerolipids	Triradylglycerols	TAG	-0.265531	-0.219945	-0.223157	-0.156967	0.41927	0.830722	0.171006	-0.216674	-0.337527	-0.21319	-0.314774	0.181796	0.158492	0.18019	-0.0445852	-0.216573	-0.298309	-0.213613	-0.0570854	0.0890623	-0.173439	0.56916
TG.34.0	lightgreen	Glycerolipids	Triradylglycerols	TAG	-0.359957	-0.452188	-0.439232	-0.386772	0.29561	0.825711	0.159242	-0.041178	-0.134646	-0.0379019	-0.282111	0.182911	0.126764	0.363458	-0.119133	-0.329469	-0.337724	-0.197855	0.036395	0.0723123	-0.225925	0.458764
TG.36.0	lightgreen	Glycerolipids	Triradylglycerols	TAG	-0.270773	-0.354607	-0.296926	-0.253373	0.330011	0.900824	0.152855	-0.0774426	-0.105661	-0.0502543	-0.230906	0.127683	0.168012	0.147359	-0.0481235	-0.261323	-0.296957	-0.0424048	0.0685592	-0.0763503	-0.0806785	0.388385
TG.38.0	lightgreen	Glycerolipids	Triradylglycerols	TAG	-0.160094	-0.233595	-0.220623	-0.0877414	0.319018	0.954372	0.410863	-0.0379385	-0.156422	-0.232892	-0.444583	0.132899	0.0549931	0.11539	-0.0825753	-0.35474	-0.435102	-0.151493	-0.0873634	0.0302121	0.0306721	0.321567
TG.40.0	lightgreen	Glycerolipids	Triradylglycerols	TAG	-0.0869284	-0.184838	-0.138864	-0.0294957	0.275188	0.88841	0.616861	0.0384281	-0.0781642	-0.194284	-0.391369	0.114568	-0.0428367	-0.0194155	-0.254214	-0.561965	-0.473691	-0.168098	-0.141125	-0.0494491	0.0119055	0.202899
TG.42.1	lightgreen	Glycerolipids	Triradylglycerols	TAG	-0.104305	-0.142373	-0.0348196	0.0798452	0.315364	0.85909	0.669294	0.0508157	-0.093941	-0.256869	-0.417432	0.0842009	-0.0323765	-0.0219026	-0.261516	-0.537643	-0.507548	-0.207862	-0.179038	-0.0107648	0.0559	0.150054
Cer.18.0.2O.24.1	lightyellow	Sphingolipids	Ceramides	DHCer	-0.0805266	0.212034	0.167773	0.222786	0.10184	-0.351447	-0.230237	-0.324618	-0.370071	-0.122188	0.117141	0.0464505	0.263913	-0.072324	0.473515	0.802782	0.496267	0.143304	0.0598991	0.214712	0.126917	0.177315
Cer.18.1.2O.24.2	lightyellow	Sphingolipids	Ceramides	Cer	-0.116274	-0.0144412	-0.197073	-0.167879	-0.0740708	-0.360352	-0.379665	-0.257957	-0.197631	0.251559	0.330789	0.0181807	0.343096	0.279141	0.620709	0.809366	0.337797	-0.0139377	0.166251	0.0742346	-0.181685	0.103167
Cer.18.2.2O.24.1	lightyellow	Sphingolipids	Ceramides	Cer	-0.135691	0.0328672	-0.0785074	0.00783474	0.0707031	-0.24703	-0.346027	-0.203332	-0.268615	0.0701284	0.108037	0.119824	0.283317	0.140832	0.454753	0.749636	0.363855	0.122264	0.273044	0.131364	-0.113162	0.268296
Cer.d42.2.Isomer.A	lightyellow	Sphingolipids	Ceramides	Cer	-0.202315	0.0550441	0.0675629	0.0863392	-0.0152677	-0.314112	-0.216399	-0.419528	-0.410024	-0.0686384	0.187182	0.104628	0.309634	0.119857	0.62888	0.854045	0.457848	0.0384119	0.0423908	0.15074	0.0537553	0.110253
Cer.d42.3	lightyellow	Sphingolipids	Ceramides	Cer	-0.0881711	0.100121	0.0430368	0.0204118	-0.0669957	-0.406091	-0.342804	-0.0635447	-0.120194	0.0179477	0.118604	0.088019	0.336577	0.145479	0.558394	0.89389	0.402361	0.111333	0.25995	0.208747	-0.0710795	0.0293772
TG.16.0_18.1_20.0	magenta	Glycerolipids	Triradylglycerols	TAG	0.408835	0.508405	0.956447	0.73135	0.17674	-0.261549	0.410528	0.127894	0.0728349	-0.33707	-0.179828	-0.175792	-0.293054	-0.508841	-0.127224	0.048905	0.0625862	0.0507767	-0.191545	0.00293748	0.166471	-0.364945
TG.52.1	magenta	Glycerolipids	Triradylglycerols	TAG	0.360263	0.38824	0.823378	0.726266	0.0793921	-0.164905	0.594092	0.143864	0.0997939	-0.366771	-0.285175	-0.0582675	-0.201011	-0.359007	-0.132958	-0.0547548	-0.0805066	-0.0470765	-0.251854	0.0871022	0.264475	-0.310202
TG.54.1	magenta	Glycerolipids	Triradylglycerols	TAG	0.12528	0.149684	0.662972	0.46464	0.297902	0.0816077	0.635781	0.10216	0.0519403	-0.282041	-0.318311	0.135455	-0.0539986	-0.122352	-0.156916	-0.176443	-0.190239	-0.227667	-0.282274	0.160677	0.049126	-0.128553
TG.54.2	magenta	Glycerolipids	Triradylglycerols	TAG	0.40298	0.503724	0.960265	0.717987	0.173014	-0.281088	0.367415	0.143895	0.0975022	-0.309689	-0.143416	-0.21013	-0.313106	-0.539429	-0.123782	0.0678966	0.100916	0.0740147	-0.186039	0.00442958	0.170727	-0.393138
TG.54.3	magenta	Glycerolipids	Triradylglycerols	TAG	0.45321	0.593214	0.919055	0.662959	0.172359	-0.288365	0.22051	0.152756	0.0422337	-0.262852	-0.0452405	-0.335241	-0.441489	-0.6266	-0.196516	0.0917562	0.107555	0.0876202	-0.16219	-0.111543	0.117576	-0.414892
TG.54.4	magenta	Glycerolipids	Triradylglycerols	TAG	0.545426	0.804801	0.859888	0.592305	0.163181	-0.346607	0.0986834	0.189677	0.0792253	-0.185015	-0.0357649	-0.347475	-0.494546	-0.498399	-0.230506	0.112483	0.16304	0.0867487	-0.109123	-0.0588863	-0.0496898	-0.390107
TG.56.3	magenta	Glycerolipids	Triradylglycerols	TAG	0.3501	0.56604	0.912958	0.667923	0.361806	-0.174245	0.222256	0.0103887	-0.0351744	-0.285262	-0.114578	-0.230365	-0.321426	-0.516675	-0.114668	0.139089	0.11896	-0.00553911	-0.242576	-0.0459236	0.0988854	-0.254838
TG.56.4	magenta	Glycerolipids	Triradylglycerols	TAG	0.47199	0.760071	0.871029	0.678381	0.217032	-0.21625	0.229726	0.0861516	-0.00616611	-0.307233	-0.136776	-0.279949	-0.416633	-0.46176	-0.196313	0.0811285	0.107653	0.0345824	-0.158565	-0.0466033	0.0123494	-0.331427
TG.54.6.Isomer.B	midnightblue	Glycerolipids	Triradylglycerols	TAG	0.83022	0.679343	0.321891	0.533225	-0.153573	-0.199541	0.22332	0.291628	0.125863	-0.0306864	-0.2071	-0.230251	-0.404024	-0.284993	-0.157698	0.0225029	-0.0871484	0.130049	-0.0176658	-0.217533	0.0974699	-0.306364
TG.56.6	midnightblue	Glycerolipids	Triradylglycerols	TAG	0.887976	0.577246	0.527045	0.540853	-0.201012	-0.220505	0.125098	0.456543	0.328788	-0.0315378	-0.154907	-0.366224	-0.493372	-0.391833	-0.229439	-0.0311554	-0.0946636	0.126562	-0.0990283	-0.22972	0.131776	-0.558554
TG.56.7.Isomer.A	midnightblue	Glycerolipids	Triradylglycerols	TAG	0.90413	0.704653	0.458172	0.449964	-0.196748	-0.252992	0.100855	0.434914	0.300045	-0.0160347	-0.114382	-0.337303	-0.529525	-0.406673	-0.226055	-0.0527888	-0.0046631	0.183537	0.00187772	-0.24692	0.0419895	-0.526453
TG.56.7.Isomer.B	midnightblue	Glycerolipids	Triradylglycerols	TAG	0.905957	0.480604	0.369822	0.444474	-0.234815	-0.147819	0.186368	0.346788	0.248457	-0.102937	-0.185969	-0.333859	-0.596587	-0.408755	-0.432838	-0.226719	-0.20747	-0.0304594	-0.266572	-0.308544	0.102045	-0.375923
TG.56.8.Isomer.A	midnightblue	Glycerolipids	Triradylglycerols	TAG	0.871381	0.513547	0.18772	0.219938	-0.200835	-0.212121	-0.0038085	0.31325	0.19624	0.109878	-0.0579066	-0.37942	-0.645168	-0.285302	-0.442459	-0.187835	-0.102634	0.00494945	-0.0891129	-0.412549	-0.172798	-0.26698
TG.58.8	midnightblue	Glycerolipids	Triradylglycerols	TAG	0.891587	0.523832	0.473554	0.379636	-0.0939025	-0.213181	0.0894167	0.346315	0.307887	-0.021747	-0.0884199	-0.384248	-0.577179	-0.399368	-0.375435	-0.183782	-0.118381	-0.0407618	-0.219952	-0.351329	-0.107214	-0.44274
TG.58.9	midnightblue	Glycerolipids	Triradylglycerols	TAG	0.860462	0.543571	0.466596	0.370121	-0.0981707	-0.112822	0.144878	0.387237	0.262025	-0.0560263	-0.0814132	-0.431365	-0.573588	-0.606538	-0.374689	-0.121924	-0.0581251	0.106079	-0.0731656	-0.419126	0.0414417	-0.457649
PC.36.4.Isomer.B	pink	Glycerophospholipids	Glycerophosphocholines	PC	0.372091	-0.00219577	0.00786044	-0.0808086	-0.13375	0.0460126	-0.00696883	0.743816	0.628068	0.337978	-0.0373328	-0.134778	-0.251145	-0.0111134	-0.311881	-0.308694	-0.312072	-0.0171735	0.0276897	-0.321632	-0.192703	-0.398695
PC.36.4.Isomer.C	pink	Glycerophospholipids	Glycerophosphocholines	PC	0.480157	0.0933723	0.134543	0.0226171	-0.313487	-0.118926	-0.0339678	0.869787	0.818045	0.312673	0.0289992	-0.297975	-0.336696	-0.109781	-0.332994	-0.213248	-0.20121	0.108573	0.111595	-0.283793	-0.040757	-0.692759
PC.37.4	pink	Glycerophospholipids	Glycerophosphocholines	PC	0.335161	-0.0920623	0.0221463	-0.148409	-0.348221	0.0183039	-0.147235	0.855095	0.82144	0.372663	0.0942016	-0.316701	-0.3362	-0.121753	-0.250194	-0.250104	-0.140242	0.202274	0.200175	-0.253487	-0.106814	-0.659174
PC.38.4.Isomer.B	pink	Glycerophospholipids	Glycerophosphocholines	PC	0.136947	-0.0729258	-0.0826222	-0.33097	0.106963	0.037334	-0.229172	0.673072	0.546375	0.398073	0.00845432	-0.210134	-0.187674	0.126088	-0.135847	-0.169636	-0.0249723	0.00573536	0.302883	-0.0820691	-0.57958	-0.228228
PC.38.4.Isomer.C	pink	Glycerophospholipids	Glycerophosphocholines	PC	0.392079	0.0820013	0.161658	-0.0872977	-0.154074	-0.0311752	-0.0880473	0.905862	0.799194	0.381425	0.0619576	-0.257684	-0.335318	-0.134817	-0.354672	-0.207009	-0.106637	0.139327	0.232703	-0.231008	-0.271016	-0.559248
PC.38.5.Isomer.A	pink	Glycerophospholipids	Glycerophosphocholines	PC	0.342932	0.0943984	0.143751	0.0268686	-0.299439	-0.167312	-0.042128	0.864264	0.786849	0.284505	0.0455261	-0.250195	-0.340328	-0.170994	-0.402015	-0.211508	-0.133152	0.157124	0.108222	0.035076	0.13527	-0.639626
PC.40.5.Isomer.A	pink	Glycerophospholipids	Glycerophosphocholines	PC	0.299729	0.0484234	-0.0175902	-0.11202	-0.226996	-0.214607	-0.167651	0.665713	0.615598	0.41749	0.172119	-0.220135	-0.316659	-0.0168157	-0.432151	-0.191024	-0.136184	-0.0568007	0.0119259	0.0203221	-0.0525256	-0.486886
PI.18.0_20.4	pink	Glycerophospholipids	Glycerophosphoinositols	PI	0.453285	0.139891	0.128809	-0.0502714	-0.129016	-0.000112485	-0.0269335	0.788978	0.636875	0.348904	0.112803	-0.579736	-0.635863	-0.318143	-0.519505	-0.292709	-0.179504	0.0306809	0.0139801	-0.25041	-0.176232	-0.628206
PI.36.4	pink	Glycerophospholipids	Glycerophosphoinositols	PI	0.163667	-0.0235336	-0.0867527	-0.0298779	-0.0348795	0.0270203	0.0603798	0.614396	0.483523	0.183084	-0.0527574	-0.434686	-0.336559	-0.143233	-0.33566	-0.258921	-0.315791	-0.0637579	0.0360627	-0.0463041	0.144826	-0.405569
PI.38.4	pink	Glycerophospholipids	Glycerophosphoinositols	PI	0.464462	0.101625	0.114812	-0.0270403	-0.162266	-0.0804914	-0.0651418	0.841092	0.685576	0.305419	0.0547756	-0.497387	-0.521478	-0.329016	-0.441649	-0.222693	-0.109949	0.0970902	0.142598	-0.266129	-0.087821	-0.681468
Cer.58.11.2O	purple	Sphingolipids	Ceramides	Cer	0.430053	0.667308	0.574281	0.905907	-0.049653	-0.175438	0.54038	-0.0488406	-0.202875	-0.475112	-0.346647	-0.0436912	-0.210191	-0.410907	-0.117965	0.0601488	-0.0940871	0.136209	-0.172055	0.0698952	0.504993	-0.113552
TG.50.1	purple	Glycerolipids	Triradylglycerols	TAG	0.38099	0.546207	0.749885	0.932845	0.000754299	-0.18787	0.631649	-0.0378369	-0.14344	-0.545257	-0.379167	-0.0383814	-0.151255	-0.424969	-0.00998429	0.0990329	-0.0872515	0.0957777	-0.167604	0.0645425	0.488687	-0.218561
TG.50.2	purple	Glycerolipids	Triradylglycerols	TAG	0.453651	0.656581	0.688496	0.951886	-0.0472158	-0.14806	0.548079	-0.0329162	-0.148157	-0.510903	-0.359411	-0.0585928	-0.193417	-0.416239	-0.0936072	0.110769	-0.145326	0.10216	-0.199224	0.0409452	0.530581	-0.1837
TG.51.2.Isomer.A	purple	Glycerolipids	Triradylglycerols	TAG	0.302785	0.531582	0.57857	0.922693	0.171112	0.12298	0.709219	-0.111362	-0.257242	-0.614567	-0.572726	0.081768	-0.126042	-0.309702	-0.0611329	0.0250036	-0.259359	0.0373839	-0.171329	0.0670653	0.468378	-0.0113381
TG.51.3	purple	Glycerolipids	Triradylglycerols	TAG	0.461951	0.749355	0.488346	0.852564	0.0952252	0.0147138	0.621566	-0.0251576	-0.234977	-0.594565	-0.571071	-0.0260003	-0.293024	-0.349368	-0.143124	0.00399316	-0.106822	0.180806	-0.0230883	0.115387	0.375738	-0.0611643
TG.52.2	purple	Glycerolipids	Triradylglycerols	TAG	0.485106	0.65607	0.828844	0.870832	-0.0574413	-0.406498	0.291984	-0.015454	-0.10649	-0.449555	-0.170247	-0.183217	-0.284196	-0.521333	-0.0114482	0.254435	0.148458	0.18747	-0.147712	0.0177712	0.349942	-0.318724
TG.53.2	purple	Glycerolipids	Triradylglycerols	TAG	0.406304	0.595895	0.776106	0.924619	0.154903	-0.108057	0.588043	-0.0507444	-0.170135	-0.585759	-0.394033	-0.0527765	-0.237388	-0.488564	-0.0810052	0.0752698	0.00660667	0.0752966	-0.191464	0.0199922	0.353422	-0.193693
TG.53.3	purple	Glycerolipids	Triradylglycerols	TAG	0.51833	0.768427	0.801828	0.911803	0.1861	-0.0551679	0.572608	0.0452273	-0.113227	-0.52146	-0.428414	-0.143583	-0.341493	-0.450348	-0.173708	0.0422853	-0.109296	0.0201317	-0.142951	-0.0159263	0.231607	-0.212096
FA.18.2..linoleic.acid.	red	Fatty Acyls	Fatty acids	Unsaturated FA	-0.367186	-0.220743	-0.404752	-0.403938	-0.0160731	-0.0358159	-0.317813	-0.262576	-0.180471	0.0594104	-0.0444557	0.329645	0.427938	0.877788	0.255531	0.185665	-0.0939005	-0.254147	0.106782	0.339651	-0.29453	0.399293
FA.18.3..linolenic.acid.	red	Fatty Acyls	Fatty acids	Unsaturated FA	-0.218425	0.00456401	-0.285851	-0.387173	0.0587603	-0.00652195	-0.250302	-0.0326497	-0.0545612	0.0724456	-0.0467834	0.197235	0.128134	0.615763	-0.0477116	-0.0334447	-0.0615966	-0.148167	0.164672	0.278084	-0.318942	0.218634
FA.20.3..homo.gamma.linolenic.acid.	red	Fatty Acyls	Fatty acids	Unsaturated FA	-0.430757	-0.430432	-0.507406	-0.384894	-0.10636	0.0669987	-0.21421	-0.307388	-0.169927	0.131159	-0.0198793	0.428456	0.559325	0.925773	0.323677	0.206677	-0.145854	-0.348149	-0.0531808	0.319656	-0.141401	0.418018
FA.20.4..arachidonic.acid.	red	Fatty Acyls	Fatty acids	Unsaturated FA	-0.481226	-0.492639	-0.519624	-0.474982	0.0352675	0.135054	-0.174028	-0.166652	-0.0657904	0.138488	-0.141158	0.565553	0.622954	0.962544	0.302837	0.110608	-0.12465	-0.275018	0.121828	0.387745	-0.305649	0.49532
FA.20.5..eicosapentaenoic.acid.	red	Fatty Acyls	Fatty acids	Unsaturated FA	-0.228436	-0.364662	-0.443406	-0.352718	-0.052123	0.168243	-0.0158996	0.084515	0.0732129	0.188091	-0.178018	0.346274	0.251828	0.747759	-0.00265276	-0.0716397	-0.215093	-0.2057	0.169208	0.35648	-0.210553	0.33325
FA.22.4	red	Fatty Acyls	Fatty acids	Unsaturated FA	-0.564538	-0.532669	-0.501228	-0.410568	0.0627268	0.208514	-0.078143	-0.265743	-0.155319	0.096202	-0.153521	0.554346	0.67613	0.902401	0.396059	0.145098	-0.166012	-0.271792	0.0945566	0.395252	-0.204655	0.564902
FA.22.6..docosahexaenoic.acid.	red	Fatty Acyls	Fatty acids	Unsaturated FA	-0.301944	-0.454219	-0.504207	-0.436477	0.0511098	0.219228	-0.0747425	-0.17292	-0.1087	0.134332	-0.193996	0.443363	0.408853	0.85878	0.063935	-0.0454471	-0.306519	-0.426893	-0.036778	0.284842	-0.324667	0.57209
X13.HODE	red	Fatty Acyls	Octadecanoids	HODE	-0.474015	-0.240707	-0.354109	-0.277386	0.0567996	0.0886587	-0.152327	-0.419952	-0.360825	-0.0695013	-0.126899	0.511841	0.549356	0.894899	0.304886	0.193476	-0.074526	-0.25465	0.0756956	0.444058	-0.295967	0.616028
X4.HDoHE	red	Fatty Acyls	Docosanoids	Docosanoids	-0.3408	-0.39695	-0.434694	-0.370561	0.0790296	0.223811	-0.0782835	-0.203737	-0.149495	0.0681667	-0.195553	0.502039	0.472333	0.892367	0.110647	0.00571452	-0.278467	-0.397542	0.0101847	0.320263	-0.387148	0.603543
X5.HETE	red	Fatty Acyls	Eicosanoids	HETE	-0.438003	-0.480569	-0.484209	-0.430053	-0.0544928	0.105235	-0.158288	-0.112141	-0.0235592	0.111445	-0.144633	0.53626	0.60869	0.951491	0.27908	0.0796836	-0.149727	-0.252801	0.12359	0.377363	-0.308485	0.425166
X8.15.DiHETE	red	Fatty Acyls	Eicosanoids	HETE	-0.592313	-0.456466	-0.559465	-0.384969	-0.0295586	0.170884	-0.0880534	-0.401961	-0.286757	0.021715	-0.0518573	0.654028	0.729284	0.795503	0.431857	0.144708	0.0267062	-0.0647632	0.189439	0.407504	-0.191355	0.584833
PEtOH.16.0_18.1	royalblue	Glycerophospholipids	Glycerophosphatidylethanol	PEth	-0.384904	-0.245388	-0.167426	-0.116092	-0.0369552	0.0382176	0.034693	-0.359932	-0.28871	-0.182102	-0.117132	0.886851	0.704298	0.544162	0.392328	0.216953	0.219508	0.00234689	0.0733854	0.492473	-0.0979122	0.462743
PEtOH.16.1_18.1	royalblue	Glycerophospholipids	Glycerophosphatidylethanol	PEth	-0.448279	-0.319086	-0.356462	-0.194935	0.0385406	0.104138	0.0862934	-0.349047	-0.327787	-0.165659	-0.19639	0.896287	0.686975	0.65132	0.286518	0.0989067	0.0952297	-0.122162	-0.0436736	0.484088	-0.0295024	0.542955
PEtOH.18.1_18.1	royalblue	Glycerophospholipids	Glycerophosphatidylethanol	PEth	-0.398664	-0.111734	-0.198682	-0.13115	0.0913375	0.0682866	0.152904	-0.448103	-0.433166	-0.150921	-0.116781	0.7927	0.480415	0.473842	0.07318	-0.0227229	0.149058	-0.0398951	0.0359303	0.467018	-0.133703	0.585547
PEtOH.18.1_20.4	royalblue	Glycerophospholipids	Glycerophosphatidylethanol	PEth	-0.31644	-0.218938	-0.233903	-0.122857	0.186645	0.216065	0.090207	-0.22764	-0.315991	-0.212646	-0.356115	0.847998	0.512437	0.460358	0.186103	-0.0112436	0.077788	0.0385888	0.218206	0.311625	-0.210856	0.602624
PEtOH.36.1	royalblue	Glycerophospholipids	Glycerophosphatidylethanol	PEth	-0.197787	-0.151702	-0.12016	0.0387344	0.0690122	0.102512	0.228086	-0.31841	-0.358423	-0.289779	-0.347771	0.817384	0.54726	0.378444	0.267326	0.0859706	0.0696201	0.027624	0.138481	0.204165	-0.0702354	0.508481
PC.P.36.3.or.PC.O.36.4	salmon	Glycerophospholipids	Glycerophosphocholines	O-PC	0.271893	-0.152011	0.0110239	-0.237918	-0.319197	-0.144714	-0.258443	0.815237	0.938146	0.477596	0.247094	-0.355031	-0.303357	-0.0729134	-0.325346	-0.237901	-0.12023	0.0116061	0.047954	-0.287152	-0.154697	-0.66125
PC.P.36.4.or.PC.O.36.5	salmon	Glycerophospholipids	Glycerophosphocholines	O-PC	0.227295	-0.0789462	0.10147	-0.18367	-0.286341	-0.182315	-0.330374	0.711014	0.850309	0.48042	0.294339	-0.297997	-0.159094	-0.178693	-0.172347	-0.12175	-0.0034323	0.17812	0.160385	-0.267905	-0.0801522	-0.569705
PC.P.38.3.or.PC.O.38.4.Isomer.B	salmon	Glycerophospholipids	Glycerophosphocholines	O-PC	0.176942	-0.164673	0.0776546	-0.150673	-0.258016	-0.0919464	-0.138791	0.776374	0.93186	0.379017	0.201859	-0.429987	-0.247376	-0.175185	-0.249693	-0.301656	-0.152186	0.117577	0.113369	-0.2763	-0.00416509	-0.714371
PC.P.38.4.or.PC.O.38.5.Isomer.A	salmon	Glycerophospholipids	Glycerophosphocholines	O-PC	0.264395	-0.07074	0.0784808	-0.191624	-0.191887	-0.0489658	-0.169588	0.815332	0.898859	0.412156	0.146311	-0.29183	-0.319145	-0.104915	-0.469002	-0.279609	-0.135124	0.0476668	0.098368	-0.114554	-0.142724	-0.516938
PC.P.40.4.or.PC.O.40.5	salmon	Glycerophospholipids	Glycerophosphocholines	O-PC	0.301573	-0.0398454	0.0558926	-0.100655	-0.257804	-0.148843	-0.129948	0.688698	0.851678	0.371596	0.105179	-0.362655	-0.290273	-0.0662581	-0.382339	-0.336248	-0.288426	0.07952	0.0909719	-0.190772	-0.0721872	-0.583211
SM.38.4.3O	salmon	Sphingolipids	Phosphosphingolipids	SM	0.268276	-0.135324	-0.00116719	-0.257744	-0.312957	-0.114964	-0.279626	0.8126	0.94424	0.467179	0.232978	-0.364628	-0.302736	-0.0860206	-0.335228	-0.256506	-0.0848393	0.0542135	0.0878372	-0.249359	-0.161258	-0.635779
SM.42.5.3O	salmon	Sphingolipids	Phosphosphingolipids	SM	0.287855	0.00693104	0.076627	-0.141117	-0.195996	-0.266936	-0.229397	0.580969	0.772349	0.385826	0.191899	-0.499101	-0.314551	-0.104671	-0.256985	-0.208388	-0.0428561	0.0677465	0.125751	-0.164213	-0.059714	-0.586328
TG.56.1	tan	Glycerolipids	Triradylglycerols	TAG	-0.16942	0.00668496	0.24315	0.0263486	0.826113	0.341766	0.33668	0.0868224	0.0183153	-0.0885608	-0.356673	0.185709	0.0248955	0.0474877	-0.154182	-0.112245	-0.107508	-0.246566	-0.0452085	0.165655	-0.365424	0.319721
TG.56.2.Isomer.B	tan	Glycerolipids	Triradylglycerols	TAG	0.117466	0.313225	0.711808	0.419607	0.754714	0.0254497	0.351706	-0.0658443	-0.141263	-0.252456	-0.27785	-0.0439149	-0.133803	-0.230959	-0.154641	0.0246708	-0.0589231	-0.263814	-0.198538	0.0559105	-0.154643	0.07581
TG.58.2	tan	Glycerolipids	Triradylglycerols	TAG	-0.112389	0.139524	0.331842	0.173286	0.947935	0.214769	0.28666	-0.105004	-0.23818	-0.111973	-0.230289	0.0447898	-0.0851244	-0.109892	-0.109243	0.00821938	-0.0755187	-0.338339	-0.165866	-0.0105175	-0.268361	0.300121
TG.58.3	tan	Glycerolipids	Triradylglycerols	TAG	-0.208572	0.109835	0.190494	0.00557365	0.807264	0.296829	0.199893	-0.147381	-0.224329	-0.06194	-0.220956	0.242093	0.0825164	0.0717688	-0.0972647	0.00270966	-0.0273006	-0.338888	-0.0609989	0.142718	-0.39029	0.408177
TG.60.1	tan	Glycerolipids	Triradylglycerols	TAG	-0.300019	-0.209248	-0.126303	-0.232233	0.762266	0.315449	0.0353328	-0.152358	-0.214261	-0.0212262	-0.156388	0.189544	0.177604	0.132291	0.101471	-0.000227694	-0.0492278	-0.27502	0.0331717	0.0383216	-0.449481	0.507584
TG.60.2	tan	Glycerolipids	Triradylglycerols	TAG	-0.301071	-0.109561	-0.0148923	-0.126113	0.884188	0.368327	0.167328	-0.171749	-0.292249	-0.0503217	-0.189232	0.126415	0.0152569	0.0728013	-0.0842389	-0.0331669	-0.117747	-0.460079	-0.18525	0.0589931	-0.332968	0.494711
TG.60.3	tan	Glycerolipids	Triradylglycerols	TAG	-0.269747	-0.110245	0.0259837	-0.0910111	0.868478	0.453529	0.241035	-0.207541	-0.311234	-0.0782003	-0.273285	0.16085	0.114224	0.0657251	-0.0695293	-0.152117	-0.182311	-0.311535	-0.113986	0.00276528	-0.296018	0.554583
TG.64.2	tan	Glycerolipids	Triradylglycerols	TAG	-0.210998	0.0516687	0.107162	0.0565897	0.894392	0.315155	0.212677	-0.256676	-0.370292	-0.105339	-0.19635	0.0708692	0.0203582	-0.0210431	0.0374558	0.0903052	-0.050106	-0.310073	-0.111414	0.00487172	-0.24142	0.437004
TG.44.0	turquoise	Glycerolipids	Triradylglycerols	TAG	0.184869	0.233763	0.307169	0.471468	0.220503	0.418501	0.825411	-0.058525	-0.191597	-0.381793	-0.353294	0.0907969	-0.184838	-0.370057	-0.330964	-0.424435	-0.398557	-0.122301	-0.245594	-0.103986	0.229801	-0.00136803
TG.46.0	turquoise	Glycerolipids	Triradylglycerols	TAG	0.00773328	0.0838913	0.180569	0.452646	0.201835	0.452372	0.948621	-0.0842013	-0.239006	-0.444178	-0.484281	0.164375	-0.060642	-0.132949	-0.185687	-0.339057	-0.445772	-0.212191	-0.32888	0.0863689	0.351931	0.099153
TG.46.1	turquoise	Glycerolipids	Triradylglycerols	TAG	0.164091	0.192877	0.337679	0.512748	0.144875	0.422985	0.907025	0.0614928	-0.101649	-0.416106	-0.40409	-0.00281582	-0.271111	-0.315626	-0.35585	-0.438759	-0.412779	-0.160136	-0.348957	-0.0263271	0.356579	-0.113509
TG.47.0.TG.14.0_16.0_17.0	turquoise	Glycerolipids	Triradylglycerols	TAG	-0.118852	-0.0571362	-0.135745	0.141789	0.355418	0.520823	0.615263	-0.0471556	-0.206194	-0.361596	-0.638806	0.359004	0.0473166	0.157064	-0.12824	-0.272322	-0.428638	-0.143485	-0.113409	0.14654	0.131532	0.414107
TG.48.0	turquoise	Glycerolipids	Triradylglycerols	TAG	0.148888	0.26772	0.481937	0.712847	0.156138	0.243491	0.930802	-0.0052943	-0.163597	-0.508699	-0.488063	0.11125	-0.0799425	-0.238845	-0.139459	-0.184662	-0.363276	-0.134212	-0.263678	0.0978405	0.39845	-0.0636816
TG.48.1	turquoise	Glycerolipids	Triradylglycerols	TAG	0.209574	0.344591	0.434646	0.76754	0.0844624	0.215172	0.900721	-0.121592	-0.257385	-0.529051	-0.439806	0.084238	-0.124819	-0.33358	-0.162428	-0.199409	-0.332752	-0.0631007	-0.341597	0.0486536	0.580238	-0.0284065
TG.48.2	turquoise	Glycerolipids	Triradylglycerols	TAG	0.359172	0.486626	0.463068	0.746567	0.0156738	0.168843	0.84914	0.0317008	-0.17855	-0.487184	-0.422841	-0.0718952	-0.341084	-0.378794	-0.288575	-0.238679	-0.275405	-0.0213475	-0.305577	0.0207075	0.496544	-0.146023
TG.48.3	turquoise	Glycerolipids	Triradylglycerols	TAG	0.367819	0.52997	0.40444	0.5828	0.0866306	0.164046	0.773824	0.0172925	-0.187881	-0.360154	-0.284584	-0.0451051	-0.341676	-0.281632	-0.383091	-0.296029	-0.277497	-0.161423	-0.366902	-0.00183417	0.2571	-0.106833
TG.49.0	turquoise	Glycerolipids	Triradylglycerols	TAG	-0.0261737	0.0352126	0.141356	0.320455	0.40551	0.443493	0.847128	0.0182609	-0.143124	-0.369095	-0.591383	0.290445	-0.0401955	0.0732985	-0.190068	-0.347773	-0.457356	-0.289494	-0.20592	0.0661482	0.0465698	0.215588
TG.49.1	turquoise	Glycerolipids	Triradylglycerols	TAG	0.077742	0.26339	0.202962	0.584476	0.401709	0.432368	0.835121	-0.1134	-0.309634	-0.502898	-0.680394	0.240076	-0.098938	-0.0923037	-0.155026	-0.229873	-0.39025	-0.0797156	-0.170458	0.101533	0.307253	0.279095
TG.49.2	turquoise	Glycerolipids	Triradylglycerols	TAG	0.143995	0.395832	0.125898	0.459103	0.347476	0.295725	0.591698	0.0456655	-0.206378	-0.426643	-0.600985	0.150871	-0.209984	-0.0585602	-0.260375	-0.149119	-0.271222	-0.0235987	-0.0513651	0.193246	0.147905	0.254127
TG.50.0	turquoise	Glycerolipids	Triradylglycerols	TAG	0.18285	0.210949	0.585348	0.588416	0.132618	0.119769	0.796378	0.103646	0.0393651	-0.366284	-0.364871	0.0817938	-0.0797034	-0.210207	-0.15052	-0.191146	-0.260026	-0.152992	-0.247631	0.134038	0.235622	-0.169151
TG.51.0	turquoise	Glycerolipids	Triradylglycerols	TAG	-0.186836	-0.140706	0.054449	0.123131	0.46081	0.542075	0.690088	-0.0284717	-0.104183	-0.268888	-0.502985	0.385338	0.112038	0.178166	-0.165632	-0.426213	-0.406359	-0.268457	-0.122828	0.150604	-0.141476	0.353137
TG.51.1.Isomer.B	turquoise	Glycerolipids	Triradylglycerols	TAG	0.175609	0.36196	0.540743	0.80824	0.250653	0.248161	0.898523	-0.0260515	-0.170683	-0.554337	-0.584207	0.129503	-0.0993686	-0.26316	-0.138781	-0.169598	-0.332678	-0.0610922	-0.22432	0.0820507	0.398854	-0.00457504
TG.52.0	turquoise	Glycerolipids	Triradylglycerols	TAG	0.0205779	-0.0572918	0.301748	0.168692	0.289596	0.431101	0.621271	0.121397	0.0471943	-0.220627	-0.430802	0.18488	-0.0496434	0.13648	-0.242363	-0.393429	-0.433055	-0.397281	-0.273827	0.13821	-0.143021	0.0761285
PE.16.1_18.1	yellow	Glycerophospholipids	Glycerophosphoethanolamines	PE	-0.0929893	-0.180606	-0.276553	-0.457957	-0.137641	-0.26311	-0.471906	0.0514614	0.140392	0.701603	0.822151	-0.256979	-0.119398	-0.0793849	-0.024699	0.244221	0.144051	-0.157006	-0.0993398	-0.343602	-0.279257	-0.205086
PE.34.1	yellow	Glycerophospholipids	Glycerophosphoethanolamines	PE	-0.165842	-0.246922	-0.244727	-0.43283	-0.235239	-0.302886	-0.500235	-0.113498	0.036209	0.647329	0.923989	-0.317887	-0.0980759	-0.138344	0.0572177	0.178283	0.327274	0.0124417	-0.0947901	-0.312134	-0.119312	-0.211868
PE.34.2	yellow	Glycerophospholipids	Glycerophosphoethanolamines	PE	-0.13286	-0.212514	-0.199079	-0.38776	-0.287202	-0.403354	-0.565146	0.047888	0.23852	0.719615	0.919549	-0.319388	0.00867304	-0.0869413	0.123132	0.320228	0.258444	0.03051	0.00643578	-0.276296	-0.137581	-0.316051
PE.36.1	yellow	Glycerophospholipids	Glycerophosphoethanolamines	PE	-0.0995867	-0.179047	-0.0349513	-0.325188	-0.283404	-0.373023	-0.525485	0.0366263	0.275404	0.594216	0.915837	-0.400528	-0.0777554	-0.238363	0.0482667	0.175509	0.329357	0.0344491	-0.0607243	-0.368698	-0.0675085	-0.485262
PE.36.2	yellow	Glycerophospholipids	Glycerophosphoethanolamines	PE	-0.112476	-0.191009	-0.112959	-0.40255	-0.266865	-0.319654	-0.538025	0.0724238	0.310784	0.686927	0.936413	-0.357749	-0.0536085	-0.13263	-0.0027134	0.13068	0.28342	-0.000942305	-0.0613728	-0.247088	-0.130194	-0.383741
PE.36.3	yellow	Glycerophospholipids	Glycerophosphoethanolamines	PE	-0.270014	-0.295855	-0.22482	-0.479019	-0.124806	-0.195684	-0.512109	-0.0456418	0.123127	0.671801	0.865096	-0.16942	0.0116896	0.0390238	-0.0109497	0.123284	0.152098	-0.148853	-0.111781	-0.199771	-0.211394	-0.143602
PE.O.16.1_18.1	yellow	Glycerophospholipids	Glycerophosphoethanolamines	O-PE	-0.0781923	-0.129216	-0.0992241	-0.36853	-0.273735	-0.370973	-0.573633	0.0810319	0.23763	0.753897	0.925286	-0.306698	-0.0622933	-0.125575	0.0841833	0.246193	0.312343	0.0884518	0.0777464	-0.259137	-0.24702	-0.319693
PE.P.34.1.or.PE.O.34.2	yellow	Glycerophospholipids	Glycerophosphoethanolamines	O-PE	-0.136119	-0.226926	-0.276346	-0.391784	-0.295421	-0.296004	-0.476079	-0.104735	-1.1129e-05	0.603855	0.779955	-0.256899	-0.0297536	-0.0207578	0.140603	0.148074	0.256325	0.0216301	0.00528474	-0.375371	-0.175576	-0.142703
PE.P.36.1.or.PE.O.36.2	yellow	Glycerophospholipids	Glycerophosphoethanolamines	O-PE	-0.0854939	-0.231404	-0.137136	-0.350589	-0.392509	-0.39047	-0.565034	0.0103099	0.239028	0.631862	0.912442	-0.272535	-0.00235477	-0.184228	0.111106	0.186197	0.372042	0.152444	0.00381095	-0.372262	-0.0756392	-0.385579
PE.P.36.2.or.PE.O.36.3	yellow	Glycerophospholipids	Glycerophosphoethanolamines	O-PE	-0.036457	-0.177722	-0.141036	-0.392299	-0.267713	-0.312518	-0.48935	0.169989	0.348064	0.791912	0.900516	-0.330886	-0.129729	-0.0715349	-0.0808472	0.0966101	0.162264	-0.0359819	0.015929	-0.308034	-0.234592	-0.350818
Phosphatidylethanolamine.alkenyl.18.0.18.2	yellow	Glycerophospholipids	Glycerophosphoethanolamines	PE	-0.184483	-0.244991	-0.191977	-0.361224	-0.332044	-0.317116	-0.488799	-0.16098	0.0433214	0.539574	0.848319	-0.0897179	0.014891	0.000309118	-0.0318576	0.126035	0.185541	-0.130541	-0.158081	-0.221623	-0.149059	-0.0970414

## Sheet: S2.Module Trait Corr10-16weeks
Correlation Coefficients
	weight_base	weight_wk26	weight_wk36	weight_mth3	weight_mth6	height_base	bmi	bmi_base	bmi_wk26	bmi_wk36	bmi_mth3	bmi_mth6	gwg	egwg	ppwr	ppwr_e	apo	preterm	apo_hdp	apo_gdm	apo_other
MEmidnightblue	-0.019	0.025	-0.019	0	-0.018	-0.069	0.007	0.02	0.065	0.06	0.025	0.002	-0.057	-0.08	0.01	-0.092	0.01	-0.025	-0.087	0.309	-0.319
MEblack	0.05	0.089	0.013	-0.022	-0.017	0.101	0.006	0.01	0.038	-0.052	-0.097	-0.087	-0.088	-0.119	-0.157	-0.168	0.231	-0.067	0.161	0.669	-0.28
MEmagenta	0.156	0.153	0.177	0.134	0.098	0.25	0.007	0.033	0.032	0.054	0.015	-0.026	-0.025	0.141	-0.141	-0.201	0.291	0.013	0.136	0.389	-0.273
MEpurple	0.315	0.356	0.307	0.221	0.237	0.241	0.223	0.224	0.271	0.202	0.112	0.128	-0.225	-0.047	-0.149	-0.052	0.443	0.069	0.412	0.49	-0.224
MEtan	0.076	0.027	-0.102	-0.028	-0.048	0.222	-0.04	-0.036	-0.12	-0.313	-0.139	-0.155	-0.288	-0.305	-0.356	-0.231	0.112	0.005	0.201	0.33	-0.483
MElightgreen	0.095	0.03	0.014	0.113	0.129	0.057	0.04	0.086	-0.026	-0.096	0.123	0.137	-0.069	-0.02	0.092	0.164	0.068	0.13	0.081	-0.115	-0.262
MEturquoise	0.294	0.349	0.292	0.304	0.302	0.233	0.164	0.199	0.239	0.119	0.219	0.213	-0.061	0.071	0.085	0.207	0.48	0.225	0.336	-0.015	-0.195
MEpink	0.01	-0.031	0.065	0.097	0.04	-0.079	0.079	0.059	0.024	0.137	0.145	0.079	0.148	0.099	0.086	-0.076	-0.259	-0.033	-0.307	-0.174	-0.07
MEsalmon	-0.076	-0.077	0.044	0.032	-0.014	-0.1	-0.043	-0.031	-0.011	0.137	0.086	0.031	0.277	0.166	0.172	-0.054	-0.284	-0.054	-0.162	-0.427	-0.016
MEbrown	-0.139	-0.118	-0.078	-0.101	-0.126	-0.187	-0.011	-0.052	0.015	0.096	-0.012	-0.04	0.048	-0.086	-0.009	-0.104	-0.474	-0.104	-0.307	-0.457	0.074
MEyellow	-0.182	-0.128	-0.045	-0.103	-0.111	-0.057	-0.149	-0.184	-0.09	0.047	-0.091	-0.098	0.261	0.149	0.151	-0.006	-0.354	0.006	-0.18	-0.391	0.283
MEroyalblue	0.076	0.051	0.008	0.1	0.129	-0.161	0.192	0.203	0.174	0.093	0.225	0.252	-0.049	-0.001	0.193	0.276	0.043	0.039	0.048	0.061	-0.315
MEgrey60	0.101	0.087	0.057	0.063	0.093	-0.054	0.153	0.157	0.162	0.131	0.106	0.136	-0.025	-0.042	0.018	0.125	-0.085	-0.106	0.29	0.119	-0.204
MEred	0.045	0.038	0.018	0.08	0.084	-0.131	0.14	0.138	0.135	0.087	0.175	0.175	0.115	0.043	0.133	0.026	-0.202	-0.041	0.168	0.064	-0.361
MEcyan	0.146	0.133	0.102	0.054	0.081	0.186	0.071	0.064	0.052	0.063	-0.05	-0.017	-0.054	-0.003	-0.134	-0.047	0.061	-0.056	0.1	0.133	0.095
MElightyellow	0.18	0.217	0.167	0.09	0.101	0.201	0.149	0.099	0.142	0.098	-0.026	-0.01	-0.099	-0.005	-0.173	-0.161	-0.052	-0.118	0.383	-0.029	-0.277
MEblue	-0.017	-0.053	0.007	-0.052	-0.045	0.053	-0.066	-0.035	-0.061	0.042	-0.094	-0.082	0.184	0.145	-0.047	-0.065	0.09	-0.001	-0.165	0.057	0.076
MEgreen	0.105	0.019	0.121	0.025	0.041	0.098	0.053	0.077	0.003	0.185	-0.03	-0.01	0.027	0.085	-0.148	-0.07	0.062	-0.096	-0.33	0.074	0.402
MElightcyan	0.183	0.081	0.145	0.093	0.093	0.089	0.184	0.183	0.091	0.224	0.055	0.056	0.047	0.062	-0.205	-0.152	-0.035	-0.011	-0.432	0.055	0.232
MEdarkred	0.167	0.203	0.212	0.116	0.106	0.135	0.077	0.126	0.156	0.112	0.071	0.062	0.16	0.224	-0.103	-0.151	0.239	-0.016	-0.01	0.436	-0.337
MEgreenyellow	0.149	0.227	0.246	0.137	0.193	-0.032	0.151	0.17	0.283	0.284	0.153	0.212	-0.118	0.027	0.157	0.181	0.385	0.123	0.154	-0.261	0.48
MEgrey	-0.085	-0.083	-0.248	-0.167	-0.141	-0.067	-0.025	-0.054	-0.079	-0.286	-0.132	-0.101	-0.242	-0.313	-0.2	-0.001	0	-0.055	0.202	0.282	-0.325
P-values
	weight_base	weight_wk26	weight_wk36	weight_mth3	weight_mth6	height_base	bmi	bmi_base	bmi_wk26	bmi_wk36	bmi_mth3	bmi_mth6	gwg	egwg	ppwr	ppwr_e	apo	preterm	apo_hdp	apo_gdm	apo_other
MEmidnightblue	0.899	0.863	0.898	0.999	0.903	0.639	0.964	0.893	0.661	0.685	0.867	0.988	0.7	0.587	0.946	0.532	0.947	0.863	0.556	0.0303	0.0248
MEblack	0.732	0.544	0.929	0.884	0.908	0.493	0.966	0.948	0.799	0.724	0.511	0.552	0.548	0.416	0.282	0.251	0.111	0.647	0.272	4.14e-08	0.0509
MEmagenta	0.285	0.297	0.226	0.36	0.507	0.0836	0.962	0.824	0.828	0.716	0.921	0.862	0.866	0.337	0.336	0.166	0.0422	0.93	0.352	0.00532	0.0572
MEpurple	0.0272	0.0117	0.0313	0.127	0.101	0.0948	0.124	0.123	0.0591	0.165	0.445	0.384	0.121	0.749	0.308	0.724	0.00124	0.641	0.003	0.000281	0.121
MEtan	0.606	0.856	0.487	0.848	0.743	0.126	0.789	0.805	0.413	0.028	0.343	0.288	0.0443	0.0323	0.0114	0.111	0.444	0.975	0.166	0.0201	0.000347
MElightgreen	0.517	0.837	0.926	0.441	0.38	0.699	0.788	0.559	0.86	0.513	0.4	0.35	0.641	0.895	0.533	0.262	0.645	0.377	0.58	0.435	0.0689
MEturquoise	0.04	0.0136	0.0415	0.0334	0.0346	0.108	0.261	0.171	0.0977	0.417	0.131	0.142	0.679	0.631	0.564	0.154	0.000392	0.12	0.0177	0.921	0.18
MEpink	0.944	0.832	0.658	0.51	0.786	0.591	0.593	0.688	0.872	0.348	0.321	0.591	0.311	0.501	0.557	0.605	0.072	0.825	0.0316	0.234	0.635
MEsalmon	0.604	0.599	0.765	0.826	0.924	0.495	0.768	0.831	0.938	0.351	0.561	0.834	0.0536	0.256	0.238	0.714	0.0475	0.712	0.268	0.00198	0.912
MEbrown	0.344	0.421	0.597	0.494	0.392	0.199	0.942	0.723	0.917	0.514	0.933	0.785	0.746	0.559	0.954	0.48	0.000473	0.481	0.0315	0.000809	0.615
MEyellow	0.213	0.383	0.761	0.484	0.449	0.7	0.309	0.207	0.54	0.75	0.534	0.505	0.0697	0.308	0.301	0.967	0.0121	0.965	0.216	0.00506	0.0486
MEroyalblue	0.604	0.731	0.955	0.498	0.38	0.27	0.188	0.163	0.232	0.529	0.121	0.0807	0.737	0.994	0.184	0.0549	0.768	0.793	0.744	0.678	0.0271
MEgrey60	0.49	0.553	0.697	0.67	0.528	0.713	0.295	0.283	0.267	0.373	0.471	0.353	0.865	0.776	0.901	0.396	0.565	0.472	0.043	0.417	0.162
MEred	0.76	0.794	0.901	0.587	0.568	0.373	0.34	0.347	0.357	0.555	0.23	0.23	0.433	0.773	0.363	0.861	0.165	0.783	0.251	0.662	0.0104
MEcyan	0.317	0.363	0.486	0.716	0.581	0.201	0.628	0.664	0.723	0.67	0.734	0.91	0.715	0.986	0.36	0.752	0.676	0.704	0.496	0.366	0.519
MElightyellow	0.218	0.135	0.254	0.54	0.494	0.166	0.308	0.501	0.332	0.505	0.861	0.944	0.501	0.975	0.237	0.27	0.723	0.423	0.0062	0.846	0.0534
MEblue	0.91	0.718	0.964	0.722	0.76	0.718	0.654	0.815	0.678	0.774	0.525	0.576	0.206	0.321	0.752	0.657	0.54	0.995	0.259	0.7	0.604
MEgreen	0.476	0.9	0.409	0.865	0.781	0.503	0.719	0.601	0.982	0.205	0.841	0.948	0.852	0.562	0.312	0.633	0.674	0.512	0.0201	0.615	0.00385
MElightcyan	0.209	0.583	0.32	0.527	0.528	0.546	0.207	0.208	0.537	0.122	0.709	0.706	0.748	0.675	0.159	0.3	0.811	0.939	0.00172	0.707	0.109
MEdarkred	0.253	0.162	0.144	0.428	0.469	0.356	0.603	0.389	0.286	0.447	0.629	0.674	0.275	0.122	0.481	0.301	0.0982	0.914	0.945	0.00152	0.0172
MEgreenyellow	0.308	0.117	0.0881	0.351	0.185	0.827	0.302	0.243	0.0482	0.0473	0.295	0.145	0.423	0.857	0.283	0.214	0.00597	0.403	0.291	0.0704	0.000387
MEgrey	0.562	0.575	0.0858	0.253	0.334	0.647	0.868	0.712	0.592	0.046	0.367	0.493	0.094	0.0282	0.169	0.993	0.998	0.708	0.165	0.0491	0.0221

## Sheet: S3.Consensus_Hub_Lipids_10-16w
Module	HubLipid	Rank
midnightblue	TG.56.7.Isomer.B	1
midnightblue	TG.56.7.Isomer.A	2
midnightblue	TG.58.8	3
midnightblue	TG.56.6	4
midnightblue	TG.56.8.Isomer.A	5
midnightblue	TG.58.9	6
midnightblue	TG.54.6.Isomer.B	7
black	TG.52.5	1
black	TG.52.4	2
black	TG.53.4	3
black	TG.54.5.Isomer.A	4
black	TG.52.3	5
black	TG.54.6.Isomer.A	6
black	TG.50.4	7
black	TG.50.3.Isomer.A	8
black	TG.51.4	9
black	TG.54.7.Isomer.A	10
magenta	TG.54.2	1
magenta	TG.16.0_18.1_20.0	2
magenta	TG.54.3	3
magenta	TG.56.3	4
magenta	TG.56.4	5
magenta	TG.54.4	6
magenta	TG.52.1	7
magenta	TG.54.1	8
purple	TG.50.2	1
purple	TG.50.1	2
purple	TG.53.2	3
purple	TG.51.2.Isomer.A	4
purple	TG.53.3	5
purple	Cer.58.11.2O	6
purple	TG.52.2	7
purple	TG.51.3	8
tan	TG.58.2	1
tan	TG.64.2	2
tan	TG.60.2	3
tan	TG.60.3	4
tan	TG.56.1	5
tan	TG.58.3	6
tan	TG.60.1	7
tan	TG.56.2.Isomer.B	8
lightgreen	TG.38.0	1
lightgreen	TG.36.0	2
lightgreen	TG.40.0	3
lightgreen	TG.42.1	4
lightgreen	TG.22.0	5
lightgreen	TG.34.0	6
turquoise	TG.46.0	1
turquoise	TG.48.0	2
turquoise	TG.46.1	3
turquoise	TG.48.1	4
turquoise	TG.51.1.Isomer.B	5
turquoise	TG.48.2	6
turquoise	TG.49.0	7
turquoise	TG.49.1	8
turquoise	TG.44.0	9
turquoise	TG.50.0	10
pink	PC.38.4.Isomer.C	1
pink	PC.36.4.Isomer.C	2
pink	PC.38.5.Isomer.A	3
pink	PC.37.4	4
pink	PI.38.4	5
pink	PI.18.0_20.4	6
pink	PC.36.4.Isomer.B	7
pink	PC.38.4.Isomer.B	8
pink	PC.40.5.Isomer.A	9
pink	PI.36.4	10
salmon	SM.38.4.3O	1
salmon	PC.P.36.3.or.PC.O.36.4	2
salmon	PC.P.38.3.or.PC.O.38.4.Isomer.B	3
salmon	PC.P.38.4.or.PC.O.38.5.Isomer.A	4
salmon	PC.P.40.4.or.PC.O.40.5	5
salmon	PC.P.36.4.or.PC.O.36.5	6
salmon	SM.42.5.3O	7
brown	PE.P.36.4.or.PE.O.36.5	1
brown	PE.P.38.5.or.PE.O.38.6	2
brown	PE.36.4	3
brown	PE.O.18.1_22.6.1	4
brown	PE.38.4	5
brown	PE.38.6	6
brown	Phosphatidylethanolamine.alkenyl.16.0.20.4	7
brown	PE.O.16.1_22.6	8
brown	PE.P.40.4.or.PE.O.40.5.Isomer.A	9
brown	PE.38.5	10
yellow	PE.36.2	1
yellow	PE.O.16.1_18.1	2
yellow	PE.34.1	3
yellow	PE.34.2	4
yellow	PE.36.1	5
yellow	PE.P.36.1.or.PE.O.36.2	6
yellow	PE.P.36.2.or.PE.O.36.3	7
yellow	PE.36.3	8
yellow	Phosphatidylethanolamine.alkenyl.18.0.18.2	9
yellow	PE.16.1_18.1	10
royalblue	PEtOH.16.1_18.1	1
royalblue	PEtOH.16.0_18.1	2
royalblue	PEtOH.18.1_20.4	3
royalblue	PEtOH.36.1	4
royalblue	PEtOH.18.1_18.1	5
grey60	Cer.d34.2	1
grey60	Cer.d34.2.Isomer.B	2
grey60	Cer.d34.1	3
grey60	Cer.d32.1	4
grey60	Cer.d33.1	5
grey60	PEtOH.16.1_16.1	6
red	FA.20.4..arachidonic.acid.	1
red	X5.HETE	2
red	FA.20.3..homo.gamma.linolenic.acid.	3
red	FA.22.4	4
red	X13.HODE	5
red	X4.HDoHE	6
red	FA.18.2..linoleic.acid.	7
red	FA.22.6..docosahexaenoic.acid.	8
red	X8.15.DiHETE	9
red	FA.20.5..eicosapentaenoic.acid.	10
cyan	Cer.d38.1	1
cyan	Cer.d40.1	2
cyan	Cer.18.2.2O.22.0	3
cyan	Cer.d36.1	4
cyan	Cer.d40.2	5
cyan	Cer.d42.1	6
cyan	Cer.18.2.2O.23.0	7
lightyellow	Cer.d42.3	1
lightyellow	Cer.d42.2.Isomer.A	2
lightyellow	Cer.18.1.2O.24.2	3
lightyellow	Cer.18.0.2O.24.1	4
lightyellow	Cer.18.2.2O.24.1	5
blue	SM.d42.0	1
blue	SM.d44.1	2
blue	SM.d40.0.Isomer.A	3
blue	SM.d40.1	4
blue	SM.d44.2.isomer.A	5
blue	PC.O.37.0	6
blue	SM.d43.1.Isomer.B	7
blue	SM.24.1	8
blue	SM.42.1.3O	9
blue	SM.d42.1	10
green	SM.d38.0.Isomer.A	1
green	SM.d41.2.Isomer.B	2
green	SM.d38.1	3
green	SM.d39.1	4
green	SM.d41.1	5
green	SM.d41.0	6
green	SM.d37.1.Isomer.B	7
green	SM.18.0.2O.21.0	8
green	SM.d40.2.Isomer.B	9
green	SM.d39.2.Isomer.B	10
lightcyan	SM.d36.1	1
lightcyan	SM.d36.0.Isomer.A	2
lightcyan	SM.d36.2	3
lightcyan	SM.d35.1	4
lightcyan	SM.d35.2	5
lightcyan	SM.d33.1	6
lightcyan	SM.d38.2	7
darkred	LPC.18.0	1
darkred	LPC.16.0	2
darkred	LPC.18.1	3
darkred	LPC.17.0	4
darkred	LPC.16.1	5
greenyellow	PC.16.0_14.0	1
greenyellow	PC.32.1	2
greenyellow	PC.33.1	3
greenyellow	PC.31.1	4
greenyellow	PC.29.0	5
greenyellow	PC.14.0_16.1	6
greenyellow	PC.28.0	7
greenyellow	PC.35.1	8
grey	FA.24.1..nervonic.acid.	1
grey	Cer.d34.2.Isomer.A	2
grey	PGE2	3
grey	palmitoyl.ethanolamide	4
grey	Cer.d46.1	5
grey	FA.19.1	6
grey	LPI.18.0	7
grey	FA.22.1..erucic.acid.	8
grey	LPC.20.2	9
grey	FA.17.0..margaric.acid.	10

## Sheet: S4.Consensus_Hub_Lipids_36-38w
Module	HubLipid	Rank
midnightblue	TG.56.6	1
midnightblue	TG.56.7.Isomer.B	2
midnightblue	TG.56.7.Isomer.A	3
midnightblue	TG.58.8	4
midnightblue	TG.56.8.Isomer.A	5
midnightblue	TG.58.9	6
midnightblue	TG.54.6.Isomer.B	7
black	TG.52.5	1
black	TG.52.4	2
black	TG.53.4	3
black	TG.54.5.Isomer.A	4
black	TG.51.4	5
black	TG.54.6.Isomer.A	6
black	TG.50.4	7
black	TG.52.3	8
black	TG.50.3.Isomer.A	9
black	TG.54.7.Isomer.A	10
magenta	TG.54.2	1
magenta	TG.16.0_18.1_20.0	2
magenta	TG.56.3	3
magenta	TG.54.3	4
magenta	TG.54.4	5
magenta	TG.56.4	6
magenta	TG.52.1	7
magenta	TG.54.1	8
purple	TG.51.2.Isomer.A	1
purple	TG.50.2	2
purple	TG.51.3	3
purple	TG.52.2	4
purple	TG.53.2	5
purple	TG.50.1	6
purple	Cer.58.11.2O	7
purple	TG.53.3	8
tan	TG.58.2	1
tan	TG.60.2	2
tan	TG.60.3	3
tan	TG.56.1	4
tan	TG.64.2	5
tan	TG.58.3	6
tan	TG.60.1	7
tan	TG.56.2.Isomer.B	8
lightgreen	TG.38.0	1
lightgreen	TG.36.0	2
lightgreen	TG.40.0	3
lightgreen	TG.34.0	4
lightgreen	TG.22.0	5
lightgreen	TG.42.1	6
turquoise	TG.46.0	1
turquoise	TG.49.0	2
turquoise	TG.51.1.Isomer.B	3
turquoise	TG.49.1	4
turquoise	TG.48.0	5
turquoise	TG.50.0	6
turquoise	TG.48.1	7
turquoise	TG.44.0	8
turquoise	TG.48.2	9
turquoise	TG.46.1	10
pink	PC.38.4.Isomer.C	1
pink	PC.36.4.Isomer.B	2
pink	PC.38.4.Isomer.B	3
pink	PI.38.4	4
pink	PC.37.4	5
pink	PC.36.4.Isomer.C	6
pink	PC.38.5.Isomer.A	7
pink	PI.18.0_20.4	8
pink	PC.40.5.Isomer.A	9
pink	PI.36.4	10
salmon	SM.38.4.3O	1
salmon	PC.P.36.4.or.PC.O.36.5	2
salmon	PC.P.40.4.or.PC.O.40.5	3
salmon	PC.P.38.4.or.PC.O.38.5.Isomer.A	4
salmon	PC.P.38.3.or.PC.O.38.4.Isomer.B	5
salmon	PC.P.36.3.or.PC.O.36.4	6
salmon	SM.42.5.3O	7
brown	PE.P.36.4.or.PE.O.36.5	1
brown	PE.P.38.5.or.PE.O.38.6	2
brown	PE.36.4	3
brown	PE.38.4	4
brown	PE.38.6	5
brown	PE.O.18.1_22.6.1	6
brown	PE.38.5	7
brown	Phosphatidylethanolamine.alkenyl.16.0.20.4	8
brown	PE.P.40.4.or.PE.O.40.5.Isomer.A	9
brown	MG.20.4	10
yellow	PE.P.36.1.or.PE.O.36.2	1
yellow	PE.36.2	2
yellow	PE.O.16.1_18.1	3
yellow	PE.34.2	4
yellow	Phosphatidylethanolamine.alkenyl.18.0.18.2	5
yellow	PE.P.36.2.or.PE.O.36.3	6
yellow	PE.36.1	7
yellow	PE.P.34.1.or.PE.O.34.2	8
yellow	PE.34.1	9
yellow	PE.16.1_18.1	10
royalblue	PEtOH.16.1_18.1	1
royalblue	PEtOH.18.1_18.1	2
royalblue	PEtOH.16.0_18.1	3
royalblue	PEtOH.36.1	4
royalblue	PEtOH.18.1_20.4	5
grey60	Cer.d34.2	1
grey60	Cer.d32.1	2
grey60	Cer.d34.2.Isomer.B	3
grey60	Cer.d34.1	4
grey60	PEtOH.16.1_16.1	5
grey60	Cer.d33.1	6
red	FA.20.3..homo.gamma.linolenic.acid.	1
red	FA.22.4	2
red	X5.HETE	3
red	FA.20.4..arachidonic.acid.	4
red	FA.22.6..docosahexaenoic.acid.	5
red	FA.18.2..linoleic.acid.	6
red	X4.HDoHE	7
red	X13.HODE	8
red	FA.18.3..linolenic.acid.	9
red	X8.15.DiHETE	10
cyan	Cer.d38.1	1
cyan	Cer.d36.1	2
cyan	Cer.d40.1	3
cyan	Cer.18.2.2O.22.0	4
cyan	Cer.18.2.2O.23.0	5
cyan	Cer.d40.2	6
cyan	Cer.d42.1	7
lightyellow	Cer.18.0.2O.24.1	1
lightyellow	Cer.d42.3	2
lightyellow	Cer.d42.2.Isomer.A	3
lightyellow	Cer.18.1.2O.24.2	4
lightyellow	Cer.18.2.2O.24.1	5
blue	SM.d42.0	1
blue	SM.d44.1	2
blue	SM.d44.2.isomer.A	3
blue	PC.O.37.0	4
blue	SM.d43.1.Isomer.B	5
blue	SM.d40.0.Isomer.A	6
blue	SM.d40.1	7
blue	SM.24.1	8
blue	SM.d42.1	9
blue	SM.42.1.3O	10
green	SM.d41.2.Isomer.B	1
green	SM.d38.1	2
green	SM.d40.2.Isomer.B	3
green	SM.d38.0.Isomer.A	4
green	SM.d39.1	5
green	SM.d41.1	6
green	SM.d41.0	7
green	SM.d37.1.Isomer.B	8
green	SM.18.0.2O.21.0	9
green	SM.d39.2.Isomer.B	10
lightcyan	SM.d36.2	1
lightcyan	SM.d35.1	2
lightcyan	SM.d36.0.Isomer.A	3
lightcyan	SM.d36.1	4
lightcyan	SM.d38.2	5
lightcyan	SM.d35.2	6
lightcyan	SM.d33.1	7
darkred	LPC.18.0	1
darkred	LPC.17.0	2
darkred	LPC.16.0	3
darkred	LPC.18.1	4
darkred	LPC.16.1	5
greenyellow	PC.16.0_14.0	1
greenyellow	PC.31.1	2
greenyellow	PC.32.1	3
greenyellow	PC.33.1	4
greenyellow	PC.29.0	5
greenyellow	PC.28.0	6
greenyellow	PC.14.0_16.1	7
greenyellow	PC.35.1	8
grey	TG.43.0	1
grey	TG.47.2	2
grey	Cer.d34.2.Isomer.A	3
grey	Cer.20.0.2O.24.0	4
grey	TG.14.0_16.0_17.1	5
grey	TG.47.3.Isomer.B	6
grey	Cer.22.0.2O.26.0	7
grey	Cer.20.0.3O.24.0..2OH.	8
grey	palmitoyl.ethanolamide	9
grey	FA.24.1..nervonic.acid.	10

## Sheet: S5.Consensus_Hub_Lipids_Postpar
Module	HubLipid	Rank
midnightblue	TG.56.7.Isomer.B	1
midnightblue	TG.56.7.Isomer.A	2
midnightblue	TG.58.8	3
midnightblue	TG.56.6	4
midnightblue	TG.56.8.Isomer.A	5
midnightblue	TG.58.9	6
midnightblue	TG.54.6.Isomer.B	7
black	TG.52.4	1
black	TG.50.4	2
black	TG.52.3	3
black	TG.52.5	4
black	TG.53.4	5
black	TG.50.3.Isomer.A	6
black	TG.54.5.Isomer.A	7
black	TG.51.4	8
black	TG.54.6.Isomer.A	9
black	TG.54.7.Isomer.A	10
magenta	TG.54.2	1
magenta	TG.16.0_18.1_20.0	2
magenta	TG.56.3	3
magenta	TG.54.3	4
magenta	TG.52.1	5
magenta	TG.54.4	6
magenta	TG.56.4	7
magenta	TG.54.1	8
purple	TG.50.2	1
purple	TG.51.2.Isomer.A	2
purple	TG.53.2	3
purple	Cer.58.11.2O	4
purple	TG.52.2	5
purple	TG.50.1	6
purple	TG.53.3	7
purple	TG.51.3	8
tan	TG.60.2	1
tan	TG.64.2	2
tan	TG.58.2	3
tan	TG.56.2.Isomer.B	4
tan	TG.56.1	5
tan	TG.60.3	6
tan	TG.60.1	7
tan	TG.58.3	8
lightgreen	TG.38.0	1
lightgreen	TG.40.0	2
lightgreen	TG.34.0	3
lightgreen	TG.36.0	4
lightgreen	TG.22.0	5
lightgreen	TG.42.1	6
turquoise	TG.46.1	1
turquoise	TG.51.1.Isomer.B	2
turquoise	TG.49.1	3
turquoise	TG.50.0	4
turquoise	TG.48.0	5
turquoise	TG.46.0	6
turquoise	TG.48.1	7
turquoise	TG.48.2	8
turquoise	TG.52.0	9
turquoise	TG.49.0	10
pink	PC.36.4.Isomer.C	1
pink	PC.38.5.Isomer.A	2
pink	PC.37.4	3
pink	PC.38.4.Isomer.C	4
pink	PC.36.4.Isomer.B	5
pink	PI.38.4	6
pink	PI.18.0_20.4	7
pink	PC.38.4.Isomer.B	8
pink	PC.40.5.Isomer.A	9
pink	PI.36.4	10
salmon	SM.38.4.3O	1
salmon	PC.P.36.3.or.PC.O.36.4	2
salmon	PC.P.38.3.or.PC.O.38.4.Isomer.B	3
salmon	PC.P.40.4.or.PC.O.40.5	4
salmon	PC.P.38.4.or.PC.O.38.5.Isomer.A	5
salmon	SM.42.5.3O	6
salmon	PC.P.36.4.or.PC.O.36.5	7
brown	PE.P.36.4.or.PE.O.36.5	1
brown	PE.36.4	2
brown	PE.P.40.4.or.PE.O.40.5.Isomer.A	3
brown	MG.20.4	4
brown	PE.38.6	5
brown	Phosphatidylethanolamine.alkenyl.16.0.20.4	6
brown	PE.P.38.5.or.PE.O.38.6	7
brown	PE.38.4	8
brown	PE.O.18.1_22.6.1	9
brown	PE.38.5	10
yellow	PE.34.2	1
yellow	PE.36.2	2
yellow	PE.34.1	3
yellow	PE.O.16.1_18.1	4
yellow	PE.36.1	5
yellow	PE.16.1_18.1	6
yellow	PE.P.36.1.or.PE.O.36.2	7
yellow	PE.P.36.2.or.PE.O.36.3	8
yellow	PE.P.34.1.or.PE.O.34.2	9
yellow	Phosphatidylethanolamine.alkenyl.18.0.18.2	10
royalblue	PEtOH.16.1_18.1	1
royalblue	PEtOH.18.1_18.1	2
royalblue	PEtOH.36.1	3
royalblue	PEtOH.16.0_18.1	4
royalblue	PEtOH.18.1_20.4	5
grey60	Cer.d34.2	1
grey60	Cer.d34.2.Isomer.B	2
grey60	Cer.d32.1	3
grey60	Cer.d34.1	4
grey60	Cer.d33.1	5
grey60	PEtOH.16.1_16.1	6
red	FA.20.4..arachidonic.acid.	1
red	X5.HETE	2
red	FA.20.3..homo.gamma.linolenic.acid.	3
red	FA.22.4	4
red	X8.15.DiHETE	5
red	X13.HODE	6
red	FA.22.6..docosahexaenoic.acid.	7
red	FA.18.2..linoleic.acid.	8
red	X4.HDoHE	9
red	FA.20.5..eicosapentaenoic.acid.	10
cyan	Cer.d40.1	1
cyan	Cer.d38.1	2
cyan	Cer.d40.2	3
cyan	Cer.d36.1	4
cyan	Cer.d42.1	5
cyan	Cer.18.2.2O.22.0	6
cyan	Cer.18.2.2O.23.0	7
lightyellow	Cer.d42.2.Isomer.A	1
lightyellow	Cer.d42.3	2
lightyellow	Cer.18.1.2O.24.2	3
lightyellow	Cer.18.2.2O.24.1	4
lightyellow	Cer.18.0.2O.24.1	5
blue	SM.d44.2.isomer.A	1
blue	SM.d42.0	2
blue	SM.d44.1	3
blue	SM.d40.0.Isomer.A	4
blue	SM.24.1	5
blue	SM.d40.1	6
blue	PC.O.37.0	7
blue	SM.42.1.3O	8
blue	SM.d42.3	9
blue	SM.d43.1.Isomer.B	10
green	SM.d38.1	1
green	SM.d38.0.Isomer.A	2
green	SM.d41.2.Isomer.B	3
green	SM.d41.0	4
green	SM.d37.1.Isomer.B	5
green	SM.d41.1	6
green	SM.d40.2.Isomer.B	7
green	SM.d39.1	8
green	SM.18.0.2O.21.0	9
green	SM.d34.2	10
lightcyan	SM.d36.1	1
lightcyan	SM.d36.2	2
lightcyan	SM.d35.1	3
lightcyan	SM.d36.0.Isomer.A	4
lightcyan	SM.d35.2	5
lightcyan	SM.d38.2	6
lightcyan	SM.d33.1	7
darkred	LPC.16.0	1
darkred	LPC.18.0	2
darkred	LPC.18.1	3
darkred	LPC.17.0	4
darkred	LPC.16.1	5
greenyellow	PC.31.1	1
greenyellow	PC.14.0_16.1	2
greenyellow	PC.16.0_14.0	3
greenyellow	PC.33.1	4
greenyellow	PC.32.1	5
greenyellow	PC.28.0	6
greenyellow	PC.29.0	7
greenyellow	PC.35.1	8
grey	PC.38.1	1
grey	PC.O.32.1	2
grey	PC.34.1	3
grey	PC.O.32.0	4
grey	PC.32.0	5
grey	PC.34.0	6
grey	SM.34.2.3O	7
grey	PC.33.0	8
grey	PC.P.36.1.or.PC.O.36.2.A	9
grey	PC.O.34.0	10

## Sheet: S6.Diff Lipids APOs 10-16wks
	FC	log2(FC)	raw.pval	#NAME?
PE.38.6	0.18267	-2.4527	0.0010768	2.9679
Phosphatidylethanolamine.alkenyl.16.0.20.4	0.21654	-2.2073	0.002608	2.5837
PE.P.38.5.or.PE.O.38.6	0.21896	-2.1913	0.00061087	3.2141
PE.O.16.1_22.6	0.22258	-2.1676	0.0030476	2.516
PC.36.4.Isomer.B	0.22408	-2.1579	0.0044336	2.3532
PE.36.4	0.22408	-2.1579	0.0014568	2.8366
PE.P.36.4.or.PE.O.36.5	0.24367	-2.037	0.0016467	2.7834
PE.O.18.1_22.6	0.2489	-2.0064	0.0094685	2.0237
N.docosanoyl.4.sphingenyl.1.O.phosphorylcholine	0.26634	-1.9087	0.0044196	2.3546
PE.38.4	0.27002	-1.8888	0.00019709	3.7053
SM.25.2.2O.15.1	0.29278	-1.7721	0.010467	1.9802
PE.P.38.4.or.PE.O.38.5	0.30202	-1.7273	0.0058594	2.2321
PE.38.5	0.3129	-1.6762	0.0092687	2.033
LPE.O.18.1	0.34727	-1.5259	0.017587	1.7548
PC.38.4.Isomer.B	0.35269	-1.5035	0.0022609	2.6457
PE.O.40.4	0.40571	-1.3015	0.010057	1.9975
PE.O.40.5.Isomer.B	0.40957	-1.2878	0.028321	1.5479
PE.P.40.4.or.PE.O.40.5.Isomer.A	0.43797	-1.1911	0.036039	1.4432
PC.P.36.4.or.PC.O.36.5	0.45716	-1.1292	0.0038209	2.4178
PS.40.4	0.47304	-1.08	0.0071575	2.1452
PC.38.4.Isomer.C	0.4802	-1.0583	0.015342	1.8141
PS.18.0_22.6	0.48336	-1.0488	0.0084763	2.0718
PE.P.34.1.or.PE.O.34.2	0.49303	-1.0203	0.014208	1.8475
LPE.16.0	0.49563	-1.0127	0.0053915	2.2683
TG.16.0_18.1_20.0	2.0991	1.0697	0.038457	1.415
TG.54.2	2.1622	1.1125	0.04354	1.3611
DG.34.1	2.2339	1.1595	0.035126	1.4544
PC.33.0	2.2523	1.1714	0.0073544	2.1335
TG.40.1	2.2963	1.1993	0.032087	1.4937
Cer.d34.0	2.3373	1.2248	0.049712	1.3035
TG.42.0	2.4079	1.2678	0.031363	1.5036
PC.O.30.0	2.4732	1.3064	0.023373	1.6313
acylcarnitine.18.0.Isomer.A	2.4932	1.318	0.013799	1.8602
TG.50.4	2.5332	1.341	0.021585	1.6658
PC.O.34.0	2.5917	1.3739	0.026383	1.5787
Cer.d42.0	2.6216	1.3905	0.025968	1.5856
acylcarnitine.16.0	2.6517	1.4069	0.035705	1.4473
TG.53.3	2.6801	1.4223	0.0071294	2.1469
PC.34.1	2.7267	1.4471	0.04892	1.3105
TG.48.3	2.7467	1.4577	0.013135	1.8816
TG.52.2	2.7562	1.4627	0.04766	1.3218
PC.35.1	2.7681	1.4689	0.027149	1.5663
PC.31.1	2.779	1.4746	0.025809	1.5882
PC.33.1	2.7801	1.4752	0.015203	1.8181
TG.50.3.Isomer.A	2.8136	1.4924	0.0076055	2.1189
Cer.d41.1	2.8925	1.5323	0.041039	1.3868
PC.14.0_16.1	2.9783	1.5745	0.031813	1.4974
PC.16.0_azealic.acid..PCPAz.PC.	3.0644	1.6156	0.024388	1.6128
PC.32.1	3.2226	1.6882	0.0081229	2.0903
PC.O.32.0	3.2292	1.6912	0.0058429	2.2334
TG.44.0	3.2305	1.6917	0.010807	1.9663
TG.49.3	3.2409	1.6964	0.033102	1.4801
TG.52.1	3.2709	1.7097	0.0021783	2.6619
PC.29.0	3.3303	1.7357	0.032093	1.4936
TG.50.2	3.4451	1.7845	0.001656	2.7809
PC.32.0	3.4907	1.8035	0.0086854	2.0612
Cer.58.11.2O	3.5892	1.8437	0.0080242	2.0956
PC.16.0_14.0	3.6438	1.8654	0.0039979	2.3982
TG.46.1	3.7142	1.893	0.011832	1.9269
TG.49.2	3.7267	1.8979	0.010671	1.9718
TG.54.1	3.7287	1.8987	0.045944	1.3378
TG.53.2	3.7747	1.9164	0.0057539	2.24
Cer.18.1.2O_26.0..2OH.	3.825	1.9355	0.014029	1.853
TG.58.4	3.8659	1.9508	0.030656	1.5135
TG.51.3	3.9064	1.9658	0.00059351	3.2266
TG.50.1	3.9462	1.9805	0.00046343	3.334
PC.O.33.0	4.0828	2.0295	0.0019191	2.7169
TG.48.2	4.2638	2.0921	0.0017548	2.7558
TG.52.0	4.2656	2.0928	0.040742	1.39
TG.49.0	4.2968	2.1032	0.0050901	2.2933
TG.51.2.Isomer.A	4.4844	2.1649	0.0012033	2.9196
TG.51.0	4.5678	2.1915	0.01198	1.9215
TG.50.0	4.5832	2.1963	0.00080269	3.0955
TG.48.1	4.7488	2.2476	0.00057742	3.2385
TG.46.0	5.1155	2.3549	0.0038578	2.4137
TG.48.0	5.1154	2.3549	0.00024781	3.6059
TG.49.1	5.6273	2.4924	0.0022549	2.6469
TG.51.1.Isomer.B	5.7244	2.5171	0.00056162	3.2506

## Sheet: S7.Module-Trait Corr36-38weeks
Correlation Coefficients
	weight_base	weight_wk26	weight_wk36	weight_mth3	weight_mth6	height_base	bmi	bmi_base	bmi_wk26	bmi_wk36	bmi_mth3	bmi_mth6	gwg	egwg	ppwr	ppwr_e	apo	preterm	apo_hdp	apo_gdm	apo_other
MEmidnightblue	-0.011	0.123	0.096	0.042	0.026	0.009	-0.01	-0.034	0.114	0.042	0.016	-0.002	0.053	0.079	0.122	0.261	0.051	0.129	0.015	-0.329	-0.145
MEblack	0.169	0.322	0.23	0.154	0.14	0.21	0.104	0.063	0.198	0.092	0.019	0.006	-0.02	0.027	-0.017	0.091	0.137	0.064	0.23	0.175	-0.127
MEmagenta	0.274	0.336	0.314	0.34	0.285	0.241	0.206	0.169	0.203	0.21	0.224	0.166	0.065	0.172	0.109	0.06	0.142	-0.023	0.119	0.14	-0.027
MEpurple	0.297	0.394	0.283	0.274	0.262	0.226	0.284	0.201	0.255	0.175	0.155	0.142	-0.13	0.062	-0.032	-0.035	0.123	0.049	0.188	0.235	-0.333
MEtan	0.207	0.2	0.221	0.289	0.274	0.109	0.142	0.174	0.133	0.162	0.262	0.241	0.175	0.177	0.264	0.363	0.184	0.113	0.135	-0.058	0.204
MElightgreen	-0.261	-0.272	-0.268	-0.295	-0.28	-0.17	-0.221	-0.215	-0.218	-0.214	-0.242	-0.223	-0.021	-0.032	-0.129	0.015	0.032	0.092	-0.224	0.028	0.306
MEturquoise	-0.042	0.008	-0.036	-0.017	-0.037	-0.092	0.059	-0.02	0.031	-0.011	0.006	-0.016	-0.103	-0.036	-0.01	0.035	0.119	0.128	-0.554	0.078	0.725
MEpink	0.107	0.128	0.159	0.101	0.091	-0.02	0.172	0.149	0.237	0.194	0.138	0.127	-0.066	0.038	-0.033	0.032	-0.124	-0.201	0.163	-0.034	-0.532
MEsalmon	0.027	0.018	0.087	0.046	0.042	-0.002	0.063	0.047	0.09	0.115	0.068	0.063	-0.026	-0.015	0.045	0.114	-0.262	-0.269	0.121	-0.048	-0.5
MEbrown	-0.178	-0.268	-0.234	-0.206	-0.222	-0.146	-0.106	-0.126	-0.172	-0.118	-0.157	-0.171	0.057	-0.092	-0.202	-0.131	-0.147	0.08	-0.106	-0.224	0.327
MEyellow	-0.243	-0.317	-0.354	-0.254	-0.29	-0.13	-0.187	-0.213	-0.29	-0.235	-0.23	-0.267	0.149	-0.029	-0.22	-0.238	-0.233	0.137	-0.234	-0.03	0.164
MEroyalblue	-0.086	-0.126	-0.213	-0.122	-0.112	-0.053	-0.065	-0.069	-0.143	-0.193	-0.108	-0.095	-0.009	-0.147	-0.092	-0.117	0.021	0.058	-0.224	-0.167	0.371
MEgrey60	0.006	-0.135	-0.19	-0.075	-0.064	-0.083	0.04	0.082	-0.08	-0.046	-0.024	-0.01	-0.038	-0.209	-0.19	-0.282	-0.051	-0.032	-0.136	0.084	0.361
MEred	-0.074	-0.215	-0.234	-0.192	-0.163	-0.105	-0.043	-0.004	-0.142	-0.154	-0.13	-0.098	-0.042	-0.141	-0.284	-0.305	0.18	0.006	-0.163	0.267	0.102
MEcyan	0.209	0.117	0.075	0.13	0.143	0.124	0.175	0.191	0.074	0.125	0.083	0.097	-0.129	-0.121	-0.132	-0.281	-0.042	-0.058	0.005	0.099	-0.103
MElightyellow	0.195	0.128	0.055	0.104	0.114	0.161	0.161	0.155	0.058	0.042	0.026	0.038	-0.229	-0.183	-0.181	-0.262	-0.007	-0.102	0.225	0.09	-0.209
MEblue	0.16	0.123	0.102	0.126	0.117	0.113	0.146	0.14	0.075	0.112	0.087	0.076	-0.029	0.011	-0.085	-0.307	-0.184	-0.231	0.125	0.117	-0.506
MEgreen	0.204	0.182	0.195	0.209	0.204	0.145	0.176	0.168	0.127	0.177	0.168	0.16	-0.02	0.092	0.045	-0.163	-0.211	-0.266	0.05	0.053	-0.384
MElightcyan	0.226	0.193	0.181	0.165	0.165	0.137	0.229	0.204	0.156	0.181	0.123	0.122	-0.103	-0.02	-0.126	-0.285	-0.223	-0.268	0.077	0.108	-0.46
MEdarkred	-0.045	-0.078	-0.079	-0.055	-0.039	-0.009	-0.089	-0.032	-0.085	-0.121	-0.038	-0.021	-0.093	-0.062	0.016	-0.091	0.153	-0.167	0.115	0.193	-0.404
MEgreenyellow	0.111	0.111	0.09	0.162	0.135	0.027	0.165	0.12	0.085	0.077	0.17	0.137	-0.053	0.072	0.085	-0.085	-0.058	-0.151	-0.11	0.024	-0.181
MEgrey	-0.198	-0.196	-0.19	-0.185	-0.174	-0.165	-0.162	-0.15	-0.129	-0.144	-0.125	-0.111	0.031	-0.075	0.019	0.203	0.185	0.273	-0.129	-0.042	0.469
	weight_base	weight_wk26	weight_wk36	weight_mth3	weight_mth6	height_base	bmi	bmi_base	bmi_wk26	bmi_wk36	bmi_mth3	bmi_mth6	gwg	egwg	ppwr	ppwr_e	apo	preterm	apo_hdp	apo_gdm	apo_other
MEmidnightblue	0.942	0.403	0.515	0.774	0.861	0.95	0.948	0.818	0.439	0.778	0.912	0.99	0.718	0.59	0.405	0.0704	0.728	0.38	0.916	0.0206	0.321
MEblack	0.247	0.0235	0.112	0.292	0.339	0.149	0.478	0.667	0.173	0.534	0.895	0.97	0.894	0.856	0.909	0.537	0.35	0.664	0.113	0.232	0.385
MEmagenta	0.0562	0.0178	0.0276	0.0162	0.0465	0.0954	0.157	0.246	0.163	0.148	0.122	0.257	0.66	0.238	0.457	0.682	0.333	0.874	0.418	0.339	0.856
MEpurple	0.0376	0.0047	0.0486	0.0568	0.0685	0.119	0.0473	0.167	0.077	0.231	0.288	0.332	0.375	0.676	0.826	0.814	0.403	0.74	0.197	0.105	0.019
MEtan	0.154	0.169	0.128	0.0434	0.0569	0.458	0.333	0.234	0.363	0.268	0.0693	0.0958	0.232	0.224	0.0667	0.00992	0.206	0.44	0.357	0.694	0.16
MElightgreen	0.0702	0.0588	0.0625	0.0391	0.051	0.245	0.127	0.138	0.133	0.14	0.0936	0.123	0.889	0.83	0.38	0.921	0.828	0.531	0.121	0.849	0.0321
MEturquoise	0.776	0.956	0.805	0.907	0.803	0.53	0.691	0.892	0.833	0.941	0.97	0.911	0.483	0.806	0.946	0.813	0.419	0.382	2.32e-05	0.596	4.88e-10
MEpink	0.466	0.381	0.277	0.494	0.536	0.894	0.238	0.307	0.101	0.183	0.347	0.388	0.652	0.797	0.823	0.826	0.398	0.167	0.266	0.819	5.78e-05
MEsalmon	0.857	0.901	0.554	0.756	0.775	0.99	0.67	0.749	0.54	0.434	0.645	0.67	0.86	0.917	0.76	0.437	0.0688	0.0618	0.409	0.742	0.000192
MEbrown	0.223	0.0623	0.106	0.156	0.125	0.317	0.469	0.389	0.24	0.422	0.284	0.241	0.697	0.531	0.164	0.372	0.317	0.587	0.472	0.122	0.0213
MEyellow	0.0928	0.0259	0.0122	0.0784	0.0425	0.374	0.199	0.142	0.0426	0.105	0.113	0.0636	0.309	0.843	0.13	0.0999	0.107	0.351	0.106	0.84	0.261
MEroyalblue	0.559	0.392	0.142	0.404	0.447	0.718	0.659	0.639	0.328	0.184	0.462	0.517	0.952	0.314	0.531	0.426	0.888	0.696	0.123	0.253	0.0082
MEgrey60	0.969	0.357	0.192	0.609	0.663	0.575	0.787	0.579	0.587	0.754	0.871	0.945	0.794	0.15	0.192	0.0493	0.728	0.83	0.354	0.566	0.0103
MEred	0.613	0.139	0.106	0.187	0.264	0.475	0.77	0.98	0.331	0.291	0.375	0.506	0.774	0.337	0.048	0.0327	0.216	0.968	0.264	0.0637	0.487
MEcyan	0.151	0.425	0.612	0.374	0.327	0.399	0.23	0.19	0.613	0.392	0.571	0.508	0.38	0.41	0.366	0.0501	0.775	0.693	0.975	0.501	0.481
MElightyellow	0.18	0.384	0.711	0.478	0.437	0.272	0.271	0.29	0.692	0.773	0.859	0.796	0.115	0.209	0.214	0.0684	0.961	0.487	0.12	0.542	0.15
MEblue	0.273	0.402	0.49	0.39	0.426	0.442	0.318	0.338	0.609	0.445	0.553	0.604	0.845	0.943	0.562	0.0313	0.206	0.111	0.394	0.425	0.000159
MEgreen	0.161	0.211	0.181	0.15	0.161	0.322	0.227	0.249	0.387	0.225	0.251	0.274	0.892	0.532	0.76	0.266	0.146	0.0642	0.734	0.719	0.00611
MElightcyan	0.12	0.186	0.214	0.258	0.26	0.35	0.113	0.161	0.287	0.215	0.404	0.404	0.485	0.891	0.39	0.0472	0.124	0.0623	0.603	0.462	0.00075
MEdarkred	0.759	0.598	0.593	0.708	0.79	0.951	0.544	0.826	0.565	0.41	0.796	0.889	0.525	0.676	0.915	0.535	0.296	0.253	0.433	0.186	0.00371
MEgreenyellow	0.449	0.449	0.541	0.268	0.356	0.855	0.258	0.412	0.564	0.601	0.244	0.349	0.718	0.623	0.562	0.564	0.693	0.302	0.455	0.871	0.216
MEgrey	0.174	0.179	0.192	0.205	0.233	0.257	0.268	0.307	0.378	0.326	0.394	0.448	0.835	0.61	0.898	0.162	0.203	0.0576	0.378	0.774	0.000565

## Sheet: S8.Diff Lipids APOs 36-38wks
	FC	log2(FC)	raw.pval	#NAME?
TG.58.4	4.7593	2.2507	0.042857	1.368
FA.30.0	4.6765	2.2254	0.016152	1.7918
FA.28.0..montanic.acid.	4.4585	2.1566	0.048197	1.317
X4.methyl.2.oxopentanoic.acid	4.1673	2.0591	0.02225	1.6527
PC.30.6	3.8057	1.9282	0.033595	1.4737
Cer.22.0.2O.26.0	3.8015	1.9266	0.045592	1.3411
FA.14.0..myristic.acid.	3.5427	1.8249	0.015918	1.7981
TG.55.3	3.3621	1.7494	0.0076957	2.1138
FA.17.0..margaric.acid.	3.3111	1.7273	0.040557	1.3919
acylcarnitine.10.0	3.2213	1.6876	0.019018	1.7208
FAHFA.38.4	3.1535	1.6569	0.010208	1.9911
LPI.18.0	3.0762	1.6211	0.011594	1.9358
FA.32.0	2.9884	1.5794	0.026426	1.578
FA.18.1..oleic.acid.	2.8999	1.536	0.0030536	2.5152
Cer.18.1.2O_26.0..2OH.	2.6605	1.4117	0.030351	1.5178
X13.HODE	2.3318	1.2214	0.048311	1.316
acylcarnitine.14.1	2.2784	1.188	0.029456	1.5308
FAHFA.18.0.20.2	2.0314	1.0225	0.042431	1.3723
PE.36.1	0.48394	-1.0471	0.028006	1.5528
SHexCer.d34.1	0.46969	-1.0902	0.039627	1.402
PC.40.5.Isomer.B	0.44484	-1.1686	0.036999	1.4318
PC.21.4	0.42594	-1.2313	0.0043059	2.3659
PE.16.1_18.1	0.37753	-1.4053	0.019602	1.7077
PE.36.4	0.31234	-1.6788	0.043574	1.3608
PC.P.38.3.or.PC.O.38.4.Isomer.B	0.29685	-1.7522	0.014678	1.8333

## Sheet: S9.Module-Trait Corr Postpartum
Correlation Coefficients
	weight_base	weight_wk26	weight_wk36	weight_mth3	weight_mth6	height_base	bmi	bmi_base	bmi_wk26	bmi_wk36	bmi_mth3	bmi_mth6	gwg	egwg	ppwr	ppwr_e	apo	preterm	apo_hdp	apo_gdm	apo_other
MEmidnightblue	0.121	0.077	0.119	0.252	0.23	0.167	-0.021	0.055	-0.027	0.017	0.197	0.168	0.07	0.085	0.386	0.349	0.134	0.111	-0.239	0.302	-0.161
MEblack	0.309	0.269	0.298	0.399	0.39	0.27	0.122	0.215	0.149	0.162	0.305	0.29	0.036	0.036	0.351	0.252	0.13	-0.048	0.065	0.703	-0.248
MEmagenta	0.247	0.205	0.199	0.315	0.31	0.27	0.046	0.127	0.052	0.029	0.217	0.208	0.054	-0.003	0.262	0.247	0.265	0.037	0.173	0.702	-0.13
MEpurple	0.286	0.215	0.23	0.353	0.349	0.364	0.042	0.12	0.005	0.014	0.211	0.203	-0.074	-0.034	0.259	0.271	0.309	0.124	0.253	0.347	-0.132
MEtan	0.234	0.269	0.211	0.274	0.29	0.132	0.09	0.192	0.226	0.138	0.246	0.261	0.171	0.077	0.231	0.205	0.24	-0.043	0.29	0.616	-0.202
MElightgreen	0.177	0.175	0.251	0.243	0.244	0.049	0.117	0.173	0.202	0.213	0.263	0.258	0.227	0.243	0.224	0.197	0.181	0.084	0.413	0.143	-0.159
MEturquoise	0.106	0.032	0.057	0.133	0.153	0.232	-0.089	-0.019	-0.121	-0.128	0.038	0.06	-0.129	-0.182	0.151	0.216	0.277	0.125	0.216	0.114	0.077
MEpink	0.075	0.031	0.094	0.131	0.087	0.086	0.051	0.043	-0.011	0.057	0.094	0.043	0.115	0.33	0.055	0.093	-0.029	-0.062	-0.236	0.415	-0.037
MEsalmon	-0.008	-0.08	0.054	0.033	-0.011	0.032	0.009	-0.028	-0.124	0.062	0.014	-0.037	0.215	0.363	-0.024	-0.083	-0.097	-0.028	-0.522	0.136	0.091
MEbrown	-0.098	-0.126	-0.105	-0.131	-0.125	-0.05	0.008	-0.065	-0.13	-0.05	-0.12	-0.111	0.084	0.012	-0.114	-0.174	-0.246	-0.01	-0.362	-0.188	0.082
MEyellow	-0.114	-0.133	-0.104	-0.156	-0.142	0.004	-0.063	-0.12	-0.168	-0.098	-0.18	-0.16	0.1	0.081	-0.124	-0.193	-0.141	0.064	-0.256	-0.128	0.016
MEroyalblue	-0.141	-0.009	-0.145	-0.198	-0.172	-0.357	0.075	0.056	0.264	0.07	-0.015	0.013	-0.111	-0.262	-0.124	-0.199	-0.222	-0.243	0.431	-0.334	-0.042
MEgrey60	-0.123	-0.073	-0.182	-0.241	-0.211	-0.352	0.107	0.072	0.172	0.051	-0.065	-0.034	-0.177	-0.271	-0.291	-0.314	-0.258	-0.23	0.232	-0.301	0.101
MEred	-0.089	-0.008	-0.111	-0.155	-0.134	-0.42	0.209	0.148	0.307	0.179	0.054	0.074	-0.173	-0.264	-0.15	-0.16	-0.234	-0.234	0.108	-0.232	0.367
MEcyan	-0.041	-0.016	-0.12	-0.207	-0.186	-0.139	0.06	0.042	0.106	0.043	-0.158	-0.133	-0.245	-0.261	-0.437	-0.414	-0.125	-0.112	0.054	-0.024	0.004
MElightyellow	0.056	0.105	0.002	-0.071	-0.065	-0.112	0.173	0.146	0.222	0.126	-0.019	-0.014	-0.209	-0.131	-0.34	-0.329	-0.123	-0.161	0.2	0.014	-0.275
MEblue	-0.127	-0.142	-0.111	-0.179	-0.19	-0.096	-0.062	-0.091	-0.101	-0.047	-0.143	-0.156	0.016	0.026	-0.25	-0.271	0.063	0.076	-0.055	0.116	-0.429
MEgreen	-0.044	-0.109	-0.029	-0.038	-0.068	0.072	-0.071	-0.106	-0.19	-0.074	-0.087	-0.12	0.017	0.166	-0.112	-0.165	-0.003	0.115	-0.433	-0.085	0.05
MElightcyan	-0.135	-0.201	-0.103	-0.16	-0.212	-0.052	-0.096	-0.126	-0.196	-0.065	-0.154	-0.21	0.154	0.178	-0.289	-0.254	-0.129	0.049	-0.4	-0.213	0.065
MEdarkred	-0.126	-0.105	-0.065	-0.093	-0.119	-0.164	-0.081	-0.073	0.008	-0.038	-0.037	-0.068	-0.096	-0.039	0.012	0.073	0.029	0.088	-0.154	0.021	0.063
MEgreenyellow	0.108	0.058	0.113	0.06	0.068	0.316	-0.034	-0.074	-0.161	-0.086	-0.113	-0.101	-0.126	0.101	-0.107	0.011	0.2	0.209	0.015	-0.439	-0.213
MEgrey	0.017	-0.022	0.05	0.014	-0.017	0.246	-0.121	-0.139	-0.207	-0.105	-0.135	-0.164	0.047	0.243	-0.1	-0.073	0.127	0.21	-0.346	0.014	-0.288
	weight_base	weight_wk26	weight_wk36	weight_mth3	weight_mth6	height_base	bmi	bmi_base	bmi_wk26	bmi_wk36	bmi_mth3	bmi_mth6	gwg	egwg	ppwr	ppwr_e	apo	preterm	apo_hdp	apo_gdm	apo_other
MEmidnightblue	0.409	0.602	0.417	0.0807	0.112	0.252	0.886	0.71	0.856	0.906	0.176	0.25	0.633	0.562	0.00569	0.0134	0.36	0.448	0.0982	0.0343	0.271
MEblack	0.0302	0.0615	0.0369	0.00422	0.00528	0.0606	0.404	0.139	0.307	0.269	0.0327	0.0426	0.81	0.805	0.0128	0.0812	0.376	0.744	0.657	3.21e-09	0.0856
MEmagenta	0.0878	0.159	0.171	0.0268	0.0295	0.0604	0.752	0.385	0.722	0.846	0.134	0.152	0.716	0.984	0.0685	0.0873	0.0655	0.803	0.236	3.49e-09	0.374
MEpurple	0.0462	0.139	0.113	0.0124	0.0136	0.00959	0.776	0.415	0.974	0.923	0.147	0.163	0.617	0.818	0.0726	0.0598	0.0305	0.4	0.0793	0.014	0.367
MEtan	0.106	0.061	0.146	0.0569	0.0432	0.367	0.538	0.187	0.119	0.346	0.0879	0.0701	0.241	0.602	0.11	0.158	0.0969	0.77	0.0425	1.09e-06	0.165
MElightgreen	0.225	0.23	0.0815	0.0929	0.0916	0.738	0.426	0.236	0.165	0.143	0.0683	0.0736	0.118	0.0923	0.123	0.177	0.215	0.566	0.00288	0.328	0.275
MEturquoise	0.472	0.828	0.699	0.363	0.296	0.108	0.544	0.9	0.411	0.383	0.798	0.683	0.381	0.212	0.303	0.137	0.0537	0.393	0.137	0.437	0.602
MEpink	0.61	0.836	0.525	0.372	0.554	0.56	0.73	0.77	0.939	0.699	0.522	0.771	0.432	0.0201	0.707	0.529	0.842	0.671	0.103	0.00275	0.803
MEsalmon	0.954	0.585	0.713	0.822	0.94	0.829	0.953	0.85	0.396	0.673	0.924	0.804	0.139	0.01	0.871	0.573	0.511	0.85	8.49e-05	0.354	0.537
MEbrown	0.505	0.39	0.476	0.371	0.393	0.732	0.958	0.661	0.376	0.734	0.412	0.448	0.57	0.933	0.437	0.233	0.0881	0.946	0.0101	0.197	0.575
MEyellow	0.438	0.363	0.481	0.285	0.333	0.977	0.669	0.414	0.249	0.507	0.217	0.274	0.497	0.581	0.398	0.184	0.337	0.664	0.0762	0.383	0.911
MEroyalblue	0.335	0.951	0.323	0.173	0.238	0.0113	0.611	0.704	0.0661	0.635	0.917	0.932	0.451	0.0692	0.4	0.171	0.126	0.0929	0.00179	0.0186	0.774
MEgrey60	0.401	0.622	0.211	0.0956	0.146	0.0128	0.466	0.627	0.238	0.728	0.658	0.819	0.226	0.0597	0.0423	0.0275	0.0738	0.112	0.109	0.035	0.492
MEred	0.546	0.959	0.451	0.289	0.36	0.00239	0.15	0.311	0.0313	0.22	0.714	0.617	0.235	0.0661	0.304	0.274	0.106	0.105	0.462	0.11	0.00908
MEcyan	0.783	0.915	0.414	0.155	0.203	0.344	0.681	0.776	0.47	0.773	0.279	0.366	0.0901	0.0697	0.0015	0.00279	0.395	0.444	0.713	0.873	0.981
MElightyellow	0.701	0.477	0.987	0.628	0.657	0.445	0.235	0.32	0.125	0.392	0.898	0.924	0.15	0.372	0.0164	0.0206	0.402	0.269	0.17	0.924	0.0554
MEblue	0.388	0.332	0.448	0.219	0.191	0.515	0.673	0.534	0.492	0.749	0.327	0.287	0.914	0.859	0.0831	0.0593	0.67	0.607	0.708	0.428	0.00186
MEgreen	0.766	0.457	0.842	0.797	0.642	0.623	0.631	0.47	0.191	0.616	0.554	0.415	0.909	0.257	0.448	0.258	0.983	0.434	0.00166	0.564	0.734
MElightcyan	0.355	0.167	0.482	0.274	0.144	0.722	0.513	0.389	0.179	0.657	0.294	0.149	0.292	0.223	0.0438	0.0785	0.381	0.739	0.00404	0.142	0.659
MEdarkred	0.39	0.476	0.657	0.527	0.418	0.261	0.584	0.619	0.955	0.795	0.801	0.644	0.513	0.791	0.936	0.619	0.844	0.548	0.292	0.885	0.667
MEgreenyellow	0.464	0.695	0.44	0.684	0.645	0.0266	0.819	0.615	0.27	0.557	0.441	0.491	0.392	0.491	0.465	0.938	0.168	0.15	0.92	0.0014	0.143
MEgrey	0.909	0.883	0.733	0.927	0.906	0.0885	0.408	0.343	0.154	0.473	0.355	0.262	0.748	0.0933	0.498	0.62	0.388	0.149	0.0145	0.927	0.044

[truncated: 6 more sheets: S10.Diff Lipids APOs Postpar, S11.PPWR Diff Lipid 10-16wks, S12.PPWR Diff Lipid 36-38wks, S13. PPWR Diff Lipid Postpartum, S14.EarlyPreg_APOs_TGs, S15.Postpartum_APOs_TGs]
