# Supplementary material for: Exploring cardiometabolic markers in adverse pregnancy outcomes: insights from the GROWell study
Source: Research Square preprint supplement (doi:10.21203/rs.3.rs-8844977/v1), 2026-04-23
Supplement: Supplementary file 1 [file dd2beefc472ce9da56decf75.docx]

Table of Contents

|  | **Supplementary Figures** |
| --- | --- |
| S1 | **Soft power threshold calculation** |
| S2 | **Cluster Dendrogram of module distribution** |
| S3 | **Hierarchical clustering dendrograms of module relationship at 10-16 weeks** |
| S4 | **Hierarchical clustering dendrograms of module relationship at 36-38 weeks** |
| S5 | **Hierarchical clustering dendrograms of module relationship at postpartum** |
| S6 | **Consensus Modules Similarity and Module Preservation** |
|  |  |

Figure S1 - Soft power threshold calculation

Figure S2 - Cluster Dendrogram of module distribution

Figure S3 - Hierarchical clustering dendrograms of module relationship at 10-16 weeks

Figure S4 Hierarchical clustering dendrograms of module relationship at 36-38 weeks

Figure S5 Hierarchical clustering dendrograms of module relationship at Postpartum

Figure S6 – Consensus modules similarity and module preservation
